# Supplementary material
Source: PubMed Central journal article supplement (PMC3152583)
Supplement: NIHMS61313-supplement-si20060602_090.pdf [file NIHMS61313-supplement-si20060602_090.pdf]

## Supplemental Data Description:

- Page 2: Table 1. Includes sequences and information concerning the HREs used in the creation of the PWM.
- Page 3: Table 2. All of the words that were found to be over-represented in the Cobalt treated group. This table includes all of the sequences and their corresponding binding transcription factor
- Page 4: Table 3. All of the words that were found to be over-represented in the TCDD treated group. This table includes all of the sequences and their corresponding binding transcription factor
- Page 5; Table 4. The integration table of all of the transcription factors identified in Tables 2 and 3 compiled along with expression data. Shading at the top of the column is as follows: Gray expression data, yellow factors over-represented in cobalt treatment and green, factors over-represented following TCDD treatment.
- Pages 6-22 Table 5 Includes probe set, expression data and gene description of all 767 genes whose expression was altered following cobalt treatment as outlined in Figure 1 of the text.
- Pages 23-33 Table 6. Includes probe set, expression data and gene description of all 430 genes whose expression was altered following TCDD treatment as outlined in Figure 1 of the text.
- Pages 34-38 Table 7. Gene ontology information (GO) for the 33 genes listed in table 2 of the paper. Data includes gene ID, abbreviation Unigene cluster number from human database (unigene #). GO number and description of GO category.
- Page 39 Table 8. PWM analysis of the DREs identified in figure 4 of the paper. Each DRE was reanalyzed with the HRE-PWM. Those response elements that scored higher than the lowest HRE (MS Score 0.813) from figure 1 are shaded in yellow.
- Page 40 Table 9. PWM analysis of the HREs identified in figure 4 of the paper. Each HRE was reanalyzed with the DRE-PWM. Those response elements that scored higher than the lowest DRE (MS Score = 0.818) from figure 1 are shaded in yellow.

Suppl. Table 1. Sequences used in the construction of HRE PWM (text Figure 1)

| Gene                   | Sequence             | Accession                | Reference                  |
|------------------------|----------------------|--------------------------|----------------------------|
| >h_leptin              | ggtagcgacgtgccggg    | AY996373                 | ambrosini_JBC2002          |
| >tranferrin receptor   | cgagcgtacgtgcctcagg  | X05339 AF248641          | Bianchi_NAR_1999           |
| >hBNIP3                | gcgccgcacgtgccacacg  | AY886764                 | Bruik_PNAS_2000            |
| >hRORa                 | tgggtggacgtgtgtgtgc  | AC107905                 | Chauvet_BiochemJ2004       |
| >mGLUT1                | tccacaggcgtgcgctctg  | D10230                   | Ebert_JBC1995              |
| >PAI-1                 | tggtgtacgtgtgtaaga   | AF386492                 | Fink_Blood2002             |
| >hPGK1                 | actgccgacgtgcgctccg  | BC103752                 | Firth_PNAS1994             |
| >mFLT                  | aggaacaacgtggaattag  | D64016                   | Hans-Peter_JBC1997         |
| >hFLT                  | aggaacaacgtggaattag  | AJ224863                 | Hans-Peter_JBC1997         |
| >mHO-1b                | agagaggacgtgccacgcc  | U70472                   | Lee_JBC                    |
| >mHO-1a                | agagcggacgtgctggcgt  | U70472                   | Lee_JBC                    |
| >rVEGF                 | agtgcatacgtgggcttcc  | U22373                   | Levy_JBC1995               |
| >hGAPDH                | ctgagctacgtgcgccgt   | AY340484                 | Lu_BBA2001                 |
| >rat_alpha_fetoprotein | ttcaccacgtgctttgt    | M18351                   | Mazure_CancerResearch_2002 |
| >hiNOS                 | agtgactacgtgctgcta   | L09126                   | Melillo_JBC1997            |
| >hDec2                 | gttccgcacgtgagctggg  | AB126167                 | Miyazaki_JBC2002           |
| >hDec1                 | tggccagacgtgctggag   | AB043885                 | Miyazaki_JBC2002           |
| >hCRLR                 | atgtaggcgtgtgtgtgt   | AE000658 AE000521 U85195 | Nikitenko_FASEB2003        |
| >hpfkfb3-B             | atgcgggacgtgagcgacg  | AB033994                 | Obach_JBC2004              |
| >hpfkfb3-B             | gtgagcgacgtgtggcagc  | AB033994                 | Obach_JBC2004              |
| >hEGLN3                | cagggcatcgtgcgctcgg  |                          | Pescador_BiochemJ_2005     |
| >mEPO                  | gggccctacgtgctgctc   | L13456                   | Pugh_PNAS1991              |
| >hTransferrin site2    | aagaaatacgtgcgcttgt  | M62823                   | Rolfs_JBC1997              |
| >hTransferrin site1    | tggtgtacgtgcaggaaa   | X05339 AF248641          | Rolfs_JBC1997              |
| >mLDH site 2           | ccagcggacgtgcgggaa   | Y00309 M27554            | Semenza_PNAS_1991          |
| >mLDH site 1           | agcctacacgtgggtccc   | Y00309 M27554            | Semenza_PNAS_1991          |
| >hEPO2                 | gctgcagacgtgcgtgtgg  | X02158                   | Semenza_PNAS_1991          |
| >hEPO1                 | gggccctacgtgctgtctc  | M11319                   | Semenza_PNAS_1991          |
| >hEnolase 1d           | tccgagtagctgacggagc  | DQ056744                 | Semenza_PNAS_1991          |
| >hEnolase 1c           | gctgagtagctgacgggact | DQ056744                 | Semenza_PNAS_1991          |
| >hEnolase 1b           | gggccggacgtggggccc   | DQ056744                 | Semenza_PNAS_1991          |
| >hEnolase 1a           | cggggccacgtgcggccg   | DQ056744                 | Semenza_PNAS_1991          |
| >hAldolaseA2           | ccctcgacgtgactcgga   | X06351                   | Semenza_PNAS_1991          |
| >hAldolaseA1           | cctctcacgtgcggggac   | X06351                   | Semenza_PNAS_1991          |
| >hVEGF                 | agtgcatacgtgggctcca  | AF095785                 | Semenza MCB                |
| >hPGK1                 | tagtgagacgtgcgcttc   | L00159 J00288            | Semenza_JBC1994            |
| >hRTP801               | gttgcttacgtgcggccg   | AL683820                 | Shoshani_MCB2002           |
| >hIGFBP1               | tggcaggacgtgctctggg  | AY434089                 | Tazuke_PNAS1998            |
| >hCA9                  | gggctgtacgtgcattgga  | BC014950                 | Wykoff_CancerResearch_2000 |

| RefSeq    | Sp1   | NF-kB | Sp1   | Egr-1 | NF-kB | AP-2   | Sp1  | Sp1   | SRE    | Sp1   | MyoD  | Sp1   | Egr-1 | MyoD  | Sp1   | NF-kB | MyoD  |
|-----------|-------|-------|-------|-------|-------|--------|------|-------|--------|-------|-------|-------|-------|-------|-------|-------|-------|
|           | tgggc | ttcca | ggggc | cccac | cctct | tggggc | cccc | gcgcg | tcctca | gcact | gtggc | cgcgg | cgccc | gcagc | tcctt | ggctt | ctggc |
| NM_002317 | 7     | 8     | 3     | 2     | 5     | 0      | 5    | 0     | 1      | 5     | 6     | 0     | 4     | 4     | 6     | 8     | 6     |
| NM_001216 | 8     | 6     | 4     | 6     | 6     | 0      | 3    | 2     | 1      | 4     | 8     | 0     | 3     | 6     | 7     | 6     | 9     |
| NM_000508 | 2     | 9     | 7     | 4     | 7     | 5      | 1    | 0     | 1      | 8     | 7     | 0     | 0     | 6     | 1     | 3     | 1     |
| NM_003330 | 7     | 7     | 4     | 3     | 6     | 2      | 1    | 0     | 1      | 5     | 9     | 2     | 2     | 7     | 5     | 11    | 11    |
| NM_003088 | 14    | 3     | 16    | 6     | 6     | 5      | 7    | 2     | 3      | 11    | 17    | 5     | 2     | 18    | 5     | 8     | 20    |
| NM_005123 | 8     | 10    | 6     | 4     | 6     | 3      | 2    | 0     | 3      | 5     | 4     | 0     | 1     | 2     | 4     | 4     | 4     |
| NM_001443 | 10    | 5     | 3     | 8     | 14    | 2      | 2    | 0     | 1      | 4     | 8     | 0     | 3     | 7     | 6     | 4     | 9     |
| NM_000277 | 5     | 9     | 4     | 9     | 9     | 0      | 2    | 0     | 2      | 5     | 5     | 0     | 1     | 6     | 6     | 11    | 7     |
| NM_002133 | 8     | 10    | 8     | 11    | 15    | 2      | 6    | 2     | 4      | 4     | 4     | 4     | 5     | 7     | 13    | 4     | 9     |
| NM_000076 | 24    | 8     | 29    | 10    | 19    | 7      | 20   | 15    | 0      | 3     | 6     | 12    | 17    | 20    | 17    | 12    | 15    |
| NM_007120 | 10    | 16    | 3     | 6     | 5     | 2      | 2    | 1     | 5      | 3     | 4     | 0     | 0     | 8     | 5     | 5     | 3     |
| NM_005962 | 8     | 7     | 5     | 5     | 10    | 1      | 6    | 4     | 1      | 5     | 9     | 8     | 8     | 10    | 11    | 5     | 9     |
| NM_001124 | 9     | 3     | 3     | 8     | 10    | 0      | 14   | 14    | 4      | 6     | 8     | 8     | 7     | 11    | 8     | 13    | 11    |
| NM_004591 | 6     | 11    | 3     | 5     | 3     | 2      | 3    | 0     | 3      | 5     | 4     | 0     | 2     | 0     | 8     | 4     | 3     |
| NM_005633 | 6     | 6     | 15    | 6     | 12    | 2      | 8    | 8     | 0      | 4     | 11    | 13    | 22    | 7     | 5     | 4     | 9     |
| NM_005141 | 8     | 8     | 1     | 5     | 3     | 0      | 3    | 0     | 2      | 5     | 3     | 0     | 1     | 2     | 7     | 4     | 4     |
| NM_000598 | 10    | 11    | 5     | 6     | 7     | 0      | 8    | 4     | 1      | 7     | 5     | 1     | 8     | 6     | 6     | 4     | 3     |
| NM_000596 | 9     | 8     | 12    | 10    | 13    | 4      | 4    | 2     | 3      | 9     | 6     | 1     | 3     | 5     | 11    | 7     | 10    |
| NM_000499 | 8     | 9     | 19    | 7     | 13    | 5      | 26   | 8     | 10     | 10    | 14    | 3     | 8     | 6     | 19    | 5     | 10    |
| NM_000096 | 7     | 8     | 4     | 2     | 8     | 3      | 3    | 1     | 1      | 4     | 4     | 0     | 2     | 3     | 5     | 5     | 3     |
| NM_002193 | 12    | 6     | 20    | 6     | 9     | 4      | 20   | 16    | 3      | 10    | 11    | 15    | 24    | 13    | 13    | 11    | 17    |
| NM_000893 | 5     | 7     | 6     | 1     | 8     | 3      | 0    | 0     | 2      | 8     | 8     | 13    | 2     | 4     | 6     | 6     | 7     |
| NM_000346 | 7     | 8     | 8     | 8     | 10    | 2      | 20   | 8     | 1      | 5     | 8     | 0     | 12    | 7     | 16    | 6     | 9     |
| NM_006824 | 5     | 4     | 1     | 5     | 9     | 0      | 9    | 0     | 1      | 4     | 6     | 1     | 6     | 7     | 10    | 5     | 7     |
| NM_000735 | 3     | 3     | 0     | 4     | 2     | 0      | 3    | 0     | 0      | 7     | 4     | 0     | 1     | 3     | 3     | 2     | 3     |
| NM_004563 | 8     | 10    | 10    | 3     | 5     | 3      | 7    | 0     | 2      | 6     | 10    | 0     | 3     | 5     | 6     | 4     | 10    |
| NM_005139 | 6     | 8     | 7     | 4     | 9     | 3      | 6    | 3     | 4      | 3     | 1     | 4     | 5     | 6     | 10    | 8     | 11    |
| NM_002153 | 5     | 9     | 6     | 11    | 12    | 2      | 1    | 0     | 3      | 9     | 6     | 0     | 1     | 3     | 14    | 7     | 12    |
| NM_002395 | 7     | 4     | 3     | 2     | 4     | 1      | 6    | 2     | 3      | 7     | 6     | 1     | 4     | 5     | 5     | 9     | 7     |
| NM_000940 | 5     | 6     | 3     | 6     | 15    | 0      | 8    | 0     | 1      | 5     | 6     | 1     | 4     | 8     | 8     | 3     | 4     |
| NM_000018 | 11    | 9     | 23    | 25    | 17    | 2      | 37   | 0     | 6      | 4     | 4     | 1     | 5     | 9     | 24    | 5     | 12    |
| NM_005542 | 6     | 7     | 14    | 13    | 8     | 5      | 9    | 9     | 3      | 4     | 3     | 7     | 10    | 12    | 8     | 3     | 3     |
| NM_001064 | 12    | 8     | 6     | 4     | 16    | 2      | 8    | 0     | 2      | 5     | 16    | 1     | 7     | 14    | 17    | 6     | 9     |

|           | GRE   | GATA-1 | GATA-3 | ISRE  | GRE    | AP-1  | c/EBPa | ISRE  | c/EBPa |
|-----------|-------|--------|--------|-------|--------|-------|--------|-------|--------|
| RefSeq    | taaac | tctca  | gatat  | aaact | ataaac | agttt | gttga  | ggaaa | aagag  |
| NM_000018 | 1     | 10     | 2      | 7     | 3      | 5     | 1      | 6     | 7      |
| NM_000076 | 0     | 8      | 2      | 1     | 0      | 2     | 2      | 9     | 4      |
| NM_000096 | 6     | 10     | 2      | 11    | 3      | 0     | 3      | 7     | 6      |
| NM_000277 | 14    | 8      | 2      | 8     | 3      | 11    | 3      | 11    | 13     |
| NM_000346 | 6     | 5      | 3      | 16    | 1      | 10    | 5      | 13    | 10     |
| NM_000499 | 2     | 12     | 1      | 1     | 1      | 6     | 1      | 4     | 9      |
| NM_000508 | 6     | 10     | 7      | 7     | 3      | 8     | 2      | 10    | 1      |
| NM_000596 | 4     | 8      | 3      | 4     | 2      | 6     | 3      | 7     | 6      |
| NM_000598 | 7     | 8      | 2      | 9     | 2      | 10    | 5      | 13    | 7      |
| NM_000735 | 11    | 7      | 7      | 16    | 2      | 5     | 12     | 15    | 10     |
| NM_000893 | 3     | 4      | 2      | 4     | 2      | 9     | 5      | 8     | 7      |
| NM_000940 | 7     | 11     | 4      | 8     | 1      | 5     | 3      | 6     | 4      |
| NM_001064 | 0     | 9      | 1      | 6     | 0      | 2     | 0      | 7     | 6      |
| NM_001124 | 7     | 5      | 3      | 7     | 1      | 6     | 6      | 8     | 10     |
| NM_001216 | 1     | 7      | 3      | 3     | 0      | 6     | 6      | 4     | 6      |
| NM_001443 | 3     | 15     | 1      | 5     | 2      | 7     | 3      | 7     | 6      |
| NM_002133 | 1     | 7      | 0      | 3     | 0      | 5     | 0      | 4     | 7      |
| NM_002153 | 4     | 9      | 7      | 9     | 1      | 4     | 4      | 10    | 5      |
| NM_002193 | 0     | 6      | 1      | 4     | 0      | 8     | 2      | 8     | 7      |
| NM_002317 | 9     | 12     | 3      | 11    | 1      | 10    | 3      | 14    | 2      |
| NM_002395 | 5     | 9      | 7      | 9     | 2      | 7     | 4      | 10    | 3      |
| NM_003088 | 2     | 4      | 0      | 2     | 0      | 2     | 4      | 2     | 2      |
| NM_003330 | 2     | 8      | 0      | 5     | 1      | 13    | 2      | 7     | 10     |
| NM_004563 | 6     | 5      | 6      | 5     | 1      | 5     | 4      | 10    | 19     |
| NM_004591 | 0     | 8      | 4      | 2     | 0      | 13    | 13     | 6     | 6      |
| NM_005123 | 4     | 6      | 5      | 13    | 0      | 9     | 5      | 12    | 14     |
| NM_005139 | 5     | 5      | 5      | 7     | 2      | 14    | 4      | 11    | 4      |
| NM_005141 | 8     | 12     | 6      | 11    | 4      | 6     | 4      | 10    | 7      |
| NM_005542 | 11    | 5      | 1      | 7     | 0      | 1     | 1      | 10    | 8      |
| NM_005633 | 4     | 4      | 1      | 5     | 2      | 8     | 3      | 11    | 9      |
| NM_005962 | 7     | 9      | 4      | 9     | 3      | 8     | 4      | 16    | 9      |
| NM_006824 | 4     | 6      | 6      | 8     | 2      | 7     | 8      | 9     | 7      |
| NM_007120 | 4     | 8      | 2      | 5     | 1      | 12    | 4      | 4     | 8      |

| RefSeq    | TCDD |       |       | MARE | E2F-1 | NRF2a | NF-kB | Sp1 | EBF | Egr-1 | AP-1 | AP-2 | RXR | SRE | MyoD | c-ETS-1 | IRS | c/EBPa | GRE | GATA1 | GATA3 | ISRE | AP-1 | c/EBPa |
|-----------|------|-------|-------|------|-------|-------|-------|-----|-----|-------|------|------|-----|-----|------|---------|-----|--------|-----|-------|-------|------|------|--------|
|           | Co   | TCDD  | + Co  |      |       |       |       |     |     |       |      |      |     |     |      |         |     |        |     |       |       |      |      |        |
| NM_001216 | 39.4 | 2.2   | 20.3  | 8    | 2     | 3     | 18    | 28  | 8   | 9     | 22   | 0    | 4   | 1   | 23   | 4       | 13  | 1      | 1   | 7     | 3     | 7    | 6    | 12     |
| NM_006824 | -1.6 | 1.8   | 1.1   | 3    | 3     | 2     | 18    | 30  | 5   | 11    | 12   | 0    | 5   | 1   | 20   | 2       | 9   | 2      | 6   | 6     | 6     | 17   | 7    | 15     |
| NM_004591 | -2.2 | -1.8  | -2.1  | 4    | 1     | 6     | 18    | 25  | 5   | 7     | 13   | 2    | 6   | 3   | 7    | 6       | 30  | 5      | 0   | 8     | 4     | 8    | 13   | 19     |
| NM_007120 | 80.7 | 77.7  | 295.4 | 5    | 1     | 3     | 26    | 24  | 7   | 6     | 21   | 2    | 8   | 5   | 15   | 5       | 12  | 1      | 5   | 8     | 2     | 9    | 12   | 12     |
| NM_002395 | 2.4  | 2.1   | 4.7   | 4    | 1     | 2     | 17    | 31  | 10  | 6     | 16   | 1    | 8   | 3   | 18   | 7       | 11  | 6      | 7   | 9     | 7     | 19   | 7    | 7      |
| NM_001064 | 1.8  | 1.9   | 2.3   | 6    | 1     | 3     | 30    | 49  | 11  | 11    | 15   | 2    | 7   | 2   | 39   | 10      | 3   | 0      | 0   | 9     | 1     | 13   | 2    | 6      |
| NM_003088 | 1.9  | 1.9   | 2.0   | 10   | 1     | 1     | 17    | 60  | 5   | 8     | 24   | 5    | 0   | 3   | 55   | 3       | 3   | 2      | 2   | 4     | 0     | 4    | 2    | 6      |
| NM_003330 | 2.5  | 1.6   | 3.2   | 5    | 2     | 2     | 24    | 24  | 4   | 5     | 21   | 2    | 7   | 1   | 27   | 14      | 14  | 1      | 3   | 8     | 0     | 12   | 13   | 12     |
| NM_001443 | -1.7 | 1.8   | -3.1  | 0    | 2     | 0     | 23    | 25  | 9   | 11    | 8    | 2    | 6   | 1   | 24   | 6       | 6   | 2      | 5   | 15    | 1     | 12   | 7    | 9      |
| NM_005139 | -1.5 | -3.1  | -2.2  | 0    | 0     | 3     | 25    | 39  | 5   | 9     | 7    | 3    | 4   | 4   | 18   | 4       | 6   | 3      | 7   | 5     | 5     | 18   | 14   | 8      |
| NM_002153 | -1.7 | -2.8  | -3.9  | 1    | 2     | 3     | 28    | 35  | 6   | 12    | 16   | 2    | 8   | 3   | 21   | 7       | 9   | 2      | 5   | 9     | 7     | 19   | 4    | 9      |
| NM_001124 | 33.1 | 1.8   | 11.0  | 3    | 2     | 2     | 26    | 62  | 10  | 15    | 10   | 0    | 8   | 4   | 30   | 3       | 10  | 4      | 8   | 5     | 3     | 15   | 6    | 16     |
| NM_005141 | 1.8  | -4.0  | -1.6  | 1    | 1     | 3     | 15    | 24  | 2   | 6     | 10   | 0    | 11  | 2   | 9    | 5       | 10  | 3      | 12  | 12    | 6     | 21   | 6    | 11     |
| NM_000735 | -1.9 | -11.9 | -4.8  | 1    | 3     | 0     | 7     | 16  | 6   | 5     | 13   | 0    | 13  | 0   | 10   | 4       | 16  | 8      | 13  | 7     | 7     | 31   | 5    | 22     |
| NM_000893 | -1.8 | -2.1  | -3.6  | 5    | 0     | 1     | 21    | 38  | 6   | 3     | 14   | 3    | 3   | 2   | 19   | 7       | 6   | 4      | 5   | 4     | 2     | 12   | 9    | 12     |
| NM_000508 | 2.9  | -1.9  | 5.9   | 4    | 1     | 3     | 19    | 19  | 3   | 4     | 16   | 5    | 10  | 1   | 14   | 5       | 11  | 2      | 9   | 10    | 7     | 17   | 8    | 3      |
| NM_005123 | -1.9 | -1.6  | -3.0  | 3    | 0     | 2     | 20    | 25  | 4   | 5     | 21   | 3    | 5   | 3   | 10   | 4       | 11  | 1      | 4   | 6     | 5     | 25   | 9    | 19     |
| NM_000940 | -1.9 | -1.7  | -3.1  | 5    | 2     | 4     | 24    | 30  | 8   | 10    | 10   | 0    | 13  | 1   | 18   | 10      | 6   | 2      | 8   | 11    | 4     | 14   | 5    | 7      |
| NM_004563 | -1.6 | -2.1  | -1.8  | 5    | 1     | 2     | 19    | 37  | 8   | 6     | 25   | 3    | 7   | 2   | 25   | 5       | 2   | 1      | 7   | 5     | 6     | 15   | 5    | 23     |
| NM_005542 | -2.0 | 1.9   | 1.1   | 4    | 1     | 3     | 18    | 57  | 5   | 23    | 16   | 5    | 7   | 3   | 18   | 5       | 2   | 2      | 11  | 5     | 1     | 17   | 1    | 9      |
| NM_005633 | 1.7  | 11.4  | 6.8   | 5    | 0     | 1     | 22    | 59  | 5   | 28    | 15   | 2    | 4   | 0   | 27   | 4       | 11  | 1      | 6   | 4     | 1     | 16   | 8    | 12     |
| NM_000277 | -1.8 | -1.8  | -2.6  | 5    | 0     | 4     | 29    | 22  | 4   | 10    | 14   | 0    | 9   | 2   | 18   | 6       | 10  | 0      | 17  | 8     | 2     | 19   | 11   | 16     |
| NM_000346 | -2.9 | -3.9  | -5.7  | 2    | 2     | 2     | 24    | 64  | 3   | 20    | 16   | 2    | 1   | 1   | 24   | 7       | 7   | 1      | 7   | 5     | 3     | 29   | 10   | 15     |
| NM_002193 | 2.5  | -2.1  | 1.1   | 5    | 5     | 4     | 26    | 106 | 7   | 30    | 19   | 4    | 5   | 3   | 41   | 6       | 5   | 0      | 0   | 6     | 1     | 12   | 8    | 9      |
| NM_000598 | -2.3 | -1.8  | -4.3  | 4    | 1     | 2     | 22    | 41  | 3   | 14    | 16   | 0    | 2   | 1   | 14   | 3       | 4   | 0      | 9   | 8     | 2     | 22   | 10   | 12     |
| NM_000596 | 10.0 | 2.2   | 3.6   | 6    | 6     | 7     | 28    | 48  | 9   | 13    | 20   | 4    | 8   | 3   | 21   | 10      | 12  | 6      | 6   | 8     | 3     | 11   | 6    | 9      |
| NM_002317 | 3.6  | -3.3  | -1.0  | 2    | 3     | 2     | 21    | 26  | 10  | 6     | 13   | 0    | 8   | 1   | 16   | 4       | 18  | 2      | 10  | 12    | 3     | 25   | 10   | 5      |
| NM_000096 | 4.5  | 1.5   | 2.2   | 4    | 2     | 3     | 21    | 24  | 3   | 4     | 15   | 3    | 11  | 1   | 10   | 4       | 13  | 5      | 9   | 10    | 2     | 18   | 0    | 9      |
| NM_002133 | 6.0  | -1.9  | 3.9   | 2    | 2     | 5     | 29    | 45  | 6   | 16    | 11   | 2    | 2   | 4   | 20   | 11      | 17  | 4      | 1   | 7     | 0     | 7    | 5    | 7      |
| NM_005962 | 10.4 | 1.6   | 7.1   | 6    | 2     | 4     | 22    | 47  | 6   | 13    | 17   | 1    | 4   | 1   | 28   | 7       | 13  | 3      | 10  | 9     | 4     | 25   | 8    | 13     |
| NM_000018 | 2.0  | 1.7   | 1.3   | 1    | 1     | 3     | 31    | 100 | 2   | 30    | 10   | 2    | 4   | 6   | 25   | 6       | 3   | 0      | 4   | 10    | 2     | 13   | 5    | 8      |
| NM_000076 | -2.6 | -2.3  | -5.6  | 4    | 0     | 0     | 39    | 120 | 4   | 27    | 6    | 7    | 0   | 0   | 41   | 7       | 3   | 0      | 0   | 8     | 2     | 10   | 2    | 6      |
| NM_000499 | -5.9 | 99.6  | 64.8  | 2    | 1     | 0     | 27    | 93  | 4   | 15    | 14   | 5    | 0   | 10  | 30   | 4       | 7   | 2      | 3   | 12    | 1     | 5    | 6    | 10     |

| Probe Set  | Co   | TCDD  | TCDD+Co | Descriptions                                                                                                                                                           |
|------------|------|-------|---------|------------------------------------------------------------------------------------------------------------------------------------------------------------------------|
| 742_at     | 0.10 | 0.08  | 0.08    | D49742 /FEATURE= /DEFINITION=HUMHGFAL Human mRNA for HGF activator like protein, complete cds                                                                          |
| 40853_at   | 0.17 | 0.46  | 0.12    | Cluster Incl. AI478147:tm34f06.x1 Homo sapiens cDNA, 3 end /clone=IMAGE-2160035 /clone_end=3 /gb=AI478147 /gi=4371373 /ug=Hs.173540 /len=637                           |
| 1025_g_at  | 0.17 | 99.58 | 64.78   | X02612 /FEATURE=expanded_cds /DEFINITION=HSCYP450 Human gene for cytochrome P(1)-450                                                                                   |
| 34297_at   | 0.17 | 0.09  | 0.11    | Cluster Incl. U87460:Human putative endothelin receptor type B-like protein mRNA, complete cds /cds=(1778,3619) /gb=U87460 /gi=2076881 /ug=Hs.27747 /len=3619          |
| 32570_at   | 0.17 | 0.13  | 0.17    | Cluster Incl. L76465:Homo sapiens NAD+-dependent 15 hydroxyprostaglandin dehydrogenase (PGDH) mRNA, complete cds /cds=(17,817) /gb=L76465 /gi=1207465 /len=817         |
| 408_at     | 0.18 | 0.19  | 0.09    | X54489 /FEATURE=mRNA /DEFINITION=HSMGSAG Human gene for melanoma growth stimulatory activity (MGSA)                                                                    |
| 38916_at   | 0.22 | 0.52  | 0.32    | Cluster Incl. U46023:Human Xq28 mRNA, complete cds /cds=(283,2388) /gb=U46023 /gi=1378037 /ug=Hs.20136 /len=4599                                                       |
| 37243_at   | 0.22 | 0.33  | 0.24    | Cluster Incl. X66533:H.sapiens soluble guanylate cyclase small subunit mRNA /cds=(88,1947) /gb=X66533 /gi=31685 /ug=Hs.77890 /len=2443                                 |
| 37322_s_at | 0.23 | 0.27  | 0.22    | Cluster Incl. X82460:H.sapiens mRNA for 15-hydroxy prostaglandin dehydrogenase /cds=(0,536) /gb=X82460 /gi=1164906 /ug=Hs.77348 /len=660                               |
| 32369_at   | 0.24 | 0.21  | 0.23    | Cluster Incl. M81349:H.sapiens serum amyloid A protein mRNA, complete cds /cds=(75,467) /gb=M81349 /gi=337749 /ug=Hs.1955 /len=614                                     |
| 39452_s_at | 0.25 | 0.40  | 0.45    | Cluster Incl. AJ005694:Homo sapiens mRNA for short form of beta II spectrin, partial /cds=(0,248) /gb=AJ005694 /gi=3097075 /ug=Hs.166202 /len=294                      |
| 31843_at   | 0.26 | 0.45  | 0.28    | Cluster Incl. AB020639:Homo sapiens mRNA for KIAA0832 protein, complete cds /cds=(154,1530) /gb=AB020639 /gi=4240152 /ug=Hs.151017 /len=5216                           |
| 33130_at   | 0.26 | 0.13  | 0.09    | Cluster Incl. AW001001:wr91d06.x1 Homo sapiens cDNA, 3 end /clone=IMAGE-2495051 /clone_end=3 /gb=AW001001 /gi=5847917 /ug=Hs.83465 /len=621                            |
| 32112_s_at | 0.27 | 0.15  | 0.14    | Cluster Incl. AI800499:tc11f11.x1 Homo sapiens cDNA, 3 end /clone=IMAGE-2063565 /clone_end=3 /gb=AI800499 /gi=5365971 /ug=Hs.161002 /len=403                           |
| 41320_s_at | 0.27 | 0.39  | 0.40    | Cluster Incl. U69609:Human transcriptional repressor (GCF2) mRNA, complete cds /cds=(124,2382) /gb=U69609 /gi=3421044 /ug=Hs.239894 /len=3505                          |
| 2017_s_at  | 0.27 | 0.74  | 0.51    | M64349 /FEATURE= /DEFINITION=HUMCYCD1 Human cyclin D (cyclin D1) mRNA, complete cds                                                                                    |
| 37637_at   | 0.27 | 0.42  | 0.14    | Cluster Incl. U27655:Human RGP3 mRNA, complete cds /cds=(287,1846) /gb=U27655 /gi=1216368 /ug=Hs.82294 /len=2638                                                       |
| 39660_at   | 0.28 | 0.78  | 0.27    | Cluster Incl. AI309115:qo71a09.x1 Homo sapiens cDNA, 3 end /clone=IMAGE-1913944 /clone_end=3 /gb=AI309115 /gi=4003986 /ug=Hs.32949 /len=450                            |
| 867_s_at   | 0.28 | 0.53  | 0.65    | U12471 /FEATURE=cds#2 /DEFINITION=HSU12471 Human thrombospondin-1 gene, partial cds                                                                                    |
| 1363_at    | 0.28 | 0.17  | 0.08    | M87770 /FEATURE= /DEFINITION=HUMKSAMI Human fibroblast growth factor receptor (K-sam) mRNA, complete cds                                                               |
| 36638_at   | 0.29 | 0.22  | 0.17    | Cluster Incl. X78947:H.sapiens mRNA for connective tissue growth factor /cds=(145,1194) /gb=X78947 /gi=474933 /ug=Hs.75511 /len=2312                                   |
| 37944_at   | 0.29 | 0.67  | 0.42    | Cluster Incl. U19523:Human GTP cyclohydrolase I mRNA, complete cds /cds=(148,900) /gb=U19523 /gi=755461 /ug=Hs.86724 /len=2900                                         |
| 1143_s_at  | 0.29 | 0.17  | 0.17    | Fibroblast Growth Factor Receptor K-Sam, Alt. Splice 3, K-Sam III                                                                                                      |
| 38772_at   | 0.30 | 0.31  | 0.50    | Cluster Incl. Y11307:H.sapiens CYR61 mRNA /cds=(223,1368) /gb=Y11307 /gi=2791897 /ug=Hs.8867 /len=2052                                                                 |
| 32319_at   | 0.31 | 1.04  | 0.29    | Cluster Incl. AL022310:dJ395P12.2 (tax-transcriptionally activated glycoprotein 1 (34kD) (OX40 ligand, OX40L)) /cds=(137,688) /gb=AL022310 /gi=3646083 /len=688        |
| 37832_at   | 0.31 | 0.57  | 0.43    | Cluster Incl. AL080062:Homo sapiens mRNA; cDNA DKFZp564I122 (from clone DKFZp564I122) /cds=(0,868) /gb=AL080062 /gi=5262466 /ug=Hs.13024 /len=868                      |
| 34022_at   | 0.32 | 0.46  | 0.48    | Cluster Incl. M36821:Human cytokine (GRO-gamma) mRNA, complete cds /cds=(77,397) /gb=M36821 /gi=183632 /ug=Hs.89690 /len=1064                                          |
| 35025_at   | 0.32 | 0.25  | 0.29    | Cluster Incl. X78686:H.sapiens ENA-78 mRNA /cds=(106,450) /gb=X78686 /gi=471242 /ug=Hs.89714 /len=1145                                                                 |
| 32640_at   | 0.32 | 0.17  | 0.13    | Cluster Incl. M24283:Human major group rhinovirus receptor (HRV) mRNA, complete cds /cds=(71,1669) /gb=M24283 /gi=184532 /ug=Hs.168383 /len=3003                       |
| 38418_at   | 0.32 | 1.07  | 0.53    | Cluster Incl. X59798:Human PRAD1 mRNA for cyclin /cds=(147,1034) /gb=X59798 /gi=35631 /ug=Hs.82932 /len=4228                                                           |
| 35410_at   | 0.32 | 0.31  | 0.24    | Cluster Incl. U81234:Human chemokine alpha 3 (CKA-3) mRNA, complete cds /cds=(63,407) /gb=U81234 /gi=4098960 /ug=Hs.164021 /len=1528                                   |
| 656_at     | 0.33 | 1.00  | 0.35    | L08488 /FEATURE= /DEFINITION=HUMINOS Human inositol polyphosphate 1-phosphatase mRNA, complete cds                                                                     |
| 41524_at   | 0.34 | 1.19  | 0.44    | Cluster Incl. L08488:Human inositol polyphosphate 1-phosphatase mRNA, complete cds /cds=(326,1525) /gb=L08488 /gi=186425 /ug=Hs.32309 /len=1705                        |
| 33436_at   | 0.34 | 0.25  | 0.17    | Cluster Incl. Z46629:Homo sapiens SOX9 mRNA /cds=(359,1888) /gb=Z46629 /gi=758102 /ug=Hs.2316 /len=3923                                                                |
| 40082_at   | 0.34 | 0.28  | 0.30    | Cluster Incl. D10040:Homo sapiens mRNA for long-chain acyl-CoA synthetase, complete cds /cds=(13,2109) /gb=D10040 /gi=219899 /ug=Hs.154890 /len=363                    |
| 34721_at   | 0.34 | 1.10  | 0.91    | Cluster Incl. U42031:Human 54 kDa progesterone receptor-associated immunophilin FKBP54 mRNA, partial cds /cds=(0,1350) /gb=U42031 /gi=1145815 /ug=Hs.1145815 /len=1350 |
| 34261_at   | 0.34 | 0.82  | 0.35    | Cluster Incl. D84307:Homo sapiens mRNA for phosphoethanolamine cytidylyltransferase, complete cds /cds=(66,1235) /gb=D84307 /gi=1817547 /ug=Hs.2263                    |
| 34517_at   | 0.35 | 1.46  | 0.50    | Cluster Incl. X66435:H.sapiens mRNA for HMG-CoA-synthase /cds=(122,1684) /gb=X66435 /gi=30008 /ug=Hs.123132 /len=1685                                                  |
| 34790_at   | 0.35 | 1.21  | 0.50    | Cluster Incl. S70154:cytosolic acetoacetyl-coenzyme A thiolase [human, liver, mRNA, 1490 nt] /cds=(37,1230) /gb=S70154 /gi=546900 /ug=Hs.4112 /len=1478                |
| 38631_at   | 0.35 | 0.57  | 0.34    | Cluster Incl. M92357:Homo sapiens B94 protein mRNA, complete cds /cds=(131,2095) /gb=M92357 /gi=306463 /ug=Hs.101382 /len=4180                                         |
| 2020_at    | 0.35 | 1.02  | 0.60    | M73554 /FEATURE= /DEFINITION=HUMBCL1 Human bcl-1 mRNA, complete CDS                                                                                                    |
| 34027_f_at | 0.35 | 0.67  | 0.48    | Cluster Incl. AA010078:ze16d01.s1 Homo sapiens cDNA, 3 end /clone=IMAGE-359137 /clone_end=3 /gb=AA010078 /gi=1471106 /ug=Hs.91031 /len=399                             |
| 32695_at   | 0.36 | 1.20  | 0.86    | Cluster Incl. Z97632:dJ196E23.2 (HIV-1 transcriptional elongation factor TAT cofactor TAT-SF1) /cds=(111,2378) /gb=Z97632 /gi=2808417 /ug=Hs.171595 /len=2378          |
| 33389_at   | 0.36 | 0.95  | 0.63    | Cluster Incl. U23942:Human lanosterol 14-demethylase cytochrome P450 (CYP51) mRNA, complete cds /cds=(122,1651) /gb=U23942 /gi=1698395 /ug=Hs.22                       |
| 2057_g_at  | 0.37 | 0.42  | 0.36    | M34641 /FEATURE= /DEFINITION=HUMFGF1A Human fibroblast growth factor (FGF) receptor-1 mRNA, complete cds                                                               |
| 33131_at   | 0.37 | 1.14  | 0.47    | Cluster Incl. X70683:H.sapiens mRNA for SOX-4 protein /cds=(350,1774) /gb=X70683 /gi=36552 /ug=Hs.83484 /len=2797                                                      |



|            |      |      |      |                                                                                                                                                          |
|------------|------|------|------|----------------------------------------------------------------------------------------------------------------------------------------------------------|
| 32193_at   | 0.38 | 0.16 | 0.18 | Cluster Incl. AF030339:Homo sapiens receptor for viral semaphorin protein (VESPR) mRNA, complete cds /cds=(249,4955) /gb=AF030339 /gi=3176761 /ug=H      |
| 38686_at   | 0.38 | 0.81 | 0.51 | Cluster Incl. X71490:H.sapiens mRNA for vacuolar proton ATPase, subunit D /cds=(256,1080) /gb=X71490 /gi=313011 /ug=Hs.106876 /len=1630                  |
| 36711_at   | 0.38 | 1.02 | 0.46 | Cluster Incl. AL021977:bK447C4.1 (novel MAFF (v-maf musculoaponeurotic fibrosarcoma (avian) oncogene family, protein F) LIKE protein) /cds=(0,494) /gb=A |
| 38429_at   | 0.38 | 1.12 | 0.52 | Cluster Incl. U29344:Human breast carcinoma fatty acid synthase mRNA, complete cds /cds=(123,7652) /gb=U29344 /gi=915391 /ug=Hs.83190 /len=8460          |
| 31521_f_at | 0.38 | 1.05 | 0.37 | Cluster Incl. X60484:H.sapiens H4/e gene for H4 histone /cds=(0,311) /gb=X60484 /gi=32000 /ug=Hs.181972 /len=312                                         |
| 1787_at    | 0.38 | 0.44 | 0.18 | U22398 /FEATURE= /DEFINITION=HSU22398 Human Cdk-inhibitor p57KIP2 (KIP2) mRNA, complete cds                                                              |
| 34213_at   | 0.39 | 0.72 | 0.55 | Cluster Incl. AB020676:Homo sapiens mRNA for KIAA0869 protein, partial cds /cds=(0,2667) /gb=AB020676 /gi=4240226 /ug=Hs.21543 /len=3408                 |
| 404_at     | 0.39 | 0.48 | 0.35 | X52425 /FEATURE=mRNA /DEFINITION=HSIL4R Human IL-4-R mRNA for the interleukin 4 receptor                                                                 |
| 35362_at   | 0.39 | 0.38 | 0.29 | Cluster Incl. AB018342:Homo sapiens mRNA for KIAA0799 protein, partial cds /cds=(0,2138) /gb=AB018342 /gi=3882318 /ug=Hs.61638 /len=5613                 |
| 39964_at   | 0.40 | 0.71 | 0.87 | Cluster Incl. AJ007590:Homo sapiens mRNA for XRP2 protein /cds=(172,1224) /gb=AJ007590 /gi=3550282 /ug=Hs.44766 /len=3813                                |
| 32588_s_at | 0.40 | 0.28 | 0.23 | Cluster Incl. X78992:H.sapiens ERF-2 mRNA /cds=(66,1544) /gb=X78992 /gi=509777 /ug=Hs.78909 /len=1629                                                    |
| 38837_at   | 0.40 | 0.86 | 0.46 | Cluster Incl. W26226:22e3 Homo sapiens cDNA /gb=W26226 /gi=1306637 /ug=Hs.91715 /len=733                                                                 |
| 39328_at   | 0.40 | 1.17 | 0.59 | Cluster Incl. M11058:Human 3-hydroxy-3-methylglutaryl coenzyme A reductase mRNA, complete cds /cds=(50,2716) /gb=M11058 /gi=184243 /ug=Hs.11899 /l       |
| 1970_s_at  | 0.40 | 0.16 | 0.18 | Z71929 /FEATURE=cds /DEFINITION=HSFGFR2MR H.sapiens FGFR2 mRNA                                                                                           |
| 36800_at   | 0.41 | 0.53 | 0.35 | Cluster Incl. M99564:Homo sapiens (clone DN10mel) P protein mRNA, complete cds /cds=(52,2568) /gb=M99564 /gi=190284 /ug=Hs.82027 /len=3070               |
| 866_at     | 0.41 | 0.73 | 0.57 | U12471 /FEATURE=cds#1 /DEFINITION=HSU12471 Human thrombospondin-1 gene, partial cds                                                                      |
| 33369_at   | 0.41 | 0.99 | 0.70 | Cluster Incl. AI535653:P9-C4.T3.P9.D4 Homo sapiens cDNA, 3 end /clone_end=3 /gb=AI535653 /gi=4449788 /ug=Hs.223018 /len=590                              |
| 40841_at   | 0.42 | 0.57 | 0.44 | Cluster Incl. AF049910:Homo sapiens TACC1 (TACC1) mRNA, complete cds /cds=(320,2737) /gb=AF049910 /gi=3435156 /ug=Hs.173159 /len=7735                    |
| 37319_at   | 0.43 | 0.55 | 0.23 | Cluster Incl. M35878:Human insulin-like growth factor-binding protein-3 gene, complete cds, clone HL1006d /cds=(132,1007) /gb=M35878 /gi=184522 /ug=Hs.  |
| AFFX-HUMIS | 0.43 | 0.74 | 0.58 | M97935 Homo sapiens transcription factor ISGF-3 mRNA, complete cds (_5,_MA,MB,_3 represent transcript regions 5 prime, MiddleA, MiddleB, and 3 prime     |
| 32855_at   | 0.43 | 0.78 | 0.57 | Cluster Incl. L00352:Human low density lipoprotein receptor gene /cds=(93,2675) /gb=L00352 /gi=460289 /ug=Hs.213289 /len=5175                            |
| 34308_at   | 0.44 | 1.38 | 0.44 | Cluster Incl. U90551:Human histone 2A-like protein (H2A/I) mRNA, complete cds /cds=(97,489) /gb=U90551 /gi=2062703 /ug=Hs.28777 /len=1666                |
| 36097_at   | 0.44 | 0.78 | 0.54 | Cluster Incl. M62831:Human transcription factor ETR101 mRNA, complete cds /cds=(100,771) /gb=M62831 /gi=182260 /ug=Hs.737 /len=1811                      |
| 40374_at   | 0.44 | 0.16 | 0.24 | Cluster Incl. X83703:H.sapiens mRNA for cytokine inducible nuclear protein /cds=(249,1208) /gb=X83703 /gi=793840 /ug=Hs.74019 /len=1885                  |
| 41554_at   | 0.44 | 1.01 | 0.89 | Cluster Incl. AF069291:Homo sapiens BAC clone 255A7 from 8q21 containing NBS1 gene, complete sequence /cds=(346,1863) /gb=AF069291 /gi=3687828 /l        |
| 41700_at   | 0.44 | 1.00 | 0.53 | Cluster Incl. M62424:Human thrombin receptor mRNA, complete cds /cds=(224,1501) /gb=M62424 /gi=339676 /ug=Hs.128087 /len=3472                            |
| 35648_at   | 0.44 | 0.94 | 0.57 | Cluster Incl. AB007902:Homo sapiens KIAA0442 mRNA, partial cds /cds=(0,3519) /gb=AB007902 /gi=2662164 /ug=Hs.32168 /len=5379                             |
| 33700_at   | 0.44 | 0.71 | 0.52 | Cluster Incl. AF039843:Homo sapiens Sprouty 2 (SPRY2) mRNA, complete cds /cds=(390,1337) /gb=AF039843 /gi=2809399 /ug=Hs.18676 /len=2117                 |
| 38875_r_at | 0.44 | 0.68 | 0.45 | Cluster Incl. AB011147:Homo sapiens mRNA for KIAA0575 protein, complete cds /cds=(109,2952) /gb=AB011147 /gi=3043673 /ug=Hs.193914 /len=5285             |
| 35916_s_at | 0.44 | 0.95 | 0.43 | Cluster Incl. AA877215:ob15e02.s1 Homo sapiens cDNA, 3 end /clone=IMAGE-1323770 /clone_end=3 /gb=AA877215 /gi=2986292 /ug=Hs.199538 /len=583             |
| 39545_at   | 0.44 | 0.44 | 0.25 | Cluster Incl. U22398:Human Cdk-inhibitor p57KIP2 (KIP2) mRNA, complete cds /cds=(260,1210) /gb=U22398 /gi=790247 /ug=Hs.106070 /len=1511                 |
| 286_at     | 0.45 | 0.69 | 0.37 | L19779 /FEATURE= /DEFINITION=HUMH2A2A Homo sapiens histone H2A.2 mRNA, complete cds                                                                      |
| 32859_at   | 0.45 | 0.83 | 0.55 | Cluster Incl. M97935:Homo sapiens transcription factor ISGF-3 mRNA, complete cds /cds=(196,2448) /gb=M97935 /gi=2281070 /ug=Hs.21486 /len=4003           |
| 32217_at   | 0.45 | 0.93 | 0.44 | Cluster Incl. AF052105:Homo sapiens clone 23965 mRNA sequence /cds=UNKNOWN /gb=AF052105 /gi=3360412 /ug=Hs.18879 /len=1542                               |
| 41193_at   | 0.45 | 0.87 | 0.43 | Cluster Incl. AB013382:Homo sapiens mRNA for DUSP6, complete cds /cds=(351,1496) /gb=AB013382 /gi=3869139 /ug=Hs.180383 /len=2390                        |
| 37483_at   | 0.45 | 0.26 | 0.52 | Cluster Incl. AB018287:Homo sapiens mRNA for KIAA0744 protein, complete cds /cds=(150,1922) /gb=AB018287 /gi=3882208 /ug=Hs.116753 /len=4238             |
| 32696_at   | 0.46 | 0.81 | 0.46 | Cluster Incl. X59841:Human PBX3 mRNA /cds=UNKNOWN /gb=X59841 /gi=35314 /ug=Hs.171680 /len=2581                                                           |
| 40385_at   | 0.46 | 0.54 | 0.48 | Cluster Incl. U64197:Homo sapiens chemokine exodus-1 mRNA, complete cds /cds=(42,329) /gb=U64197 /gi=1778716 /ug=Hs.75498 /len=821                       |
| 41772_at   | 0.46 | 0.60 | 0.49 | Cluster Incl. M68840:Human monoamine oxidase A (MAOA) mRNA, complete cds /cds=(73,1656) /gb=M68840 /gi=187352 /ug=Hs.183109 /len=1949                    |
| 39883_at   | 0.46 | 1.11 | 0.57 | Cluster Incl. AF091078:Homo sapiens clone 559 unknown mRNA, complete sequence /cds=(151,528) /gb=AF091078 /gi=3859993 /ug=Hs.125819 /len=1014            |
| 37331_g_at | 0.46 | 0.78 | 0.36 | Cluster Incl. U24266:Human pyrroline-5-carboxylate dehydrogenase (P5CDh) mRNA, long form, complete cds /cds=(30,1721) /gb=U24266 /gi=1353247 /ug=H       |
| 40165_at   | 0.46 | 1.12 | 0.55 | Cluster Incl. AB015345:Homo sapiens HRIHFB2216 mRNA, partial cds /cds=(0,1460) /gb=AB015345 /gi=3970875 /ug=Hs.136164 /len=1605                          |
| 41574_at   | 0.46 | 1.23 | 0.99 | Cluster Incl. Y09703:H.sapiens mRNA for MEMA protein /cds=(406,2166) /gb=Y09703 /gi=4581462 /ug=Hs.44499 /len=3259                                       |
| 33446_at   | 0.46 | 0.63 | 0.42 | Cluster Incl. W26407:29b8 Homo sapiens cDNA /gb=W26407 /gi=1307106 /ug=Hs.233806 /len=885                                                                |
| 38687_at   | 0.47 | 0.90 | 0.75 | Cluster Incl. AL050051:Homo sapiens mRNA; cDNA DKFZp566D193 (from clone DKFZp566D193) /cds=(0,358) /gb=AL050051 /gi=4884099 /ug=Hs.106909 /l             |
| 41596_s_at | 0.47 | 0.67 | 0.40 | Cluster Incl. U43572:Human alpha-N-acetylglucosaminidase (NAGLU) gene, complete cds /cds=(332,2563) /gb=U43572 /gi=1171228 /ug=Hs.50727 /len=2775        |
| 38560_at   | 0.47 | 0.79 | 0.78 | Cluster Incl. AJ006778:Homo sapiens mRNA for DRIM protein /cds=(144,8501) /gb=AJ006778 /gi=3242213 /ug=Hs.178614 /len=8988                               |

|            |      |      |      |                                                                                                                                                                   |
|------------|------|------|------|-------------------------------------------------------------------------------------------------------------------------------------------------------------------|
| 40541_at   | 0.47 | 0.72 | 0.48 | Cluster Incl. X01630:Human mRNA for argininosuccinate synthetase /cds=(75,1313) /gb=X01630 /gi=28871 /ug=Hs.160786 /len=1547                                      |
| 753_at     | 0.48 | 0.38 | 0.41 | D86425 /FEATURE= /DEFINITION=D86425 Homo sapiens mRNA for osteonidogen, complete cds                                                                              |
| 33328_at   | 0.48 | 0.38 | 0.32 | Cluster Incl. W28612:49b3 Homo sapiens cDNA /gb=W28612 /gi=1308560 /ug=Hs.184724 /len=809                                                                         |
| 34539_at   | 0.48 | 1.04 | 0.63 | Cluster Incl. AF065854:Homo sapiens OR7E12P pseudogene, complete sequence /cds=(0,941) /gb=AF065854 /gi=3831591 /ug=Hs.238008 /len=942                            |
| 40567_at   | 0.48 | 1.41 | 0.94 | Cluster Incl. X01703:Human gene for alpha-tubulin (b alpha 1) /cds=(213,1568) /gb=X01703 /gi=37491 /ug=Hs.169476 /len=1764                                        |
| 1952_s_at  | 0.48 | 0.92 | 0.51 | AF010607 /FEATURE=mRNA /DEFINITION=HASMAD5S6 Homo sapiens SMAD5 (Smad5) gene, exon 6 and complete cds                                                             |
| 35343_at   | 0.48 | 0.66 | 0.52 | Cluster Incl. M37400:Human cytosolic aspartate aminotransferase mRNA, complete cds /cds=(24,1265) /gb=M37400 /gi=179066 /ug=Hs.597 /len=1941                      |
| AFFX-HUMIS | 0.48 | 0.77 | 0.59 | M97935 Homo sapiens transcription factor ISGF-3 mRNA, complete cds (_5, _MA, MB, _3 represent transcript regions 5 prime, MiddleA, MiddleB, and 3 prime           |
| 39549_at   | 0.49 | 0.76 | 0.51 | Cluster Incl. AI743090:wg87a11.x1 Homo sapiens cDNA, 3 end /clone=IMAGE-2372060 /clone_end=3 /gb=AI743090 /gi=5111378 /ug=Hs.106705 /len=547                      |
| 32574_at   | 0.49 | 0.67 | 0.29 | Cluster Incl. X59960:H.sapiens mRNA for sphingomyelinase /cds=(122,2005) /gb=X59960 /gi=402620 /ug=Hs.77813 /len=2392                                             |
| 925_at     | 0.49 | 0.74 | 0.51 | J03909 /FEATURE= /DEFINITION=HUMIIP Human gamma-interferon-inducible protein (IP-30) mRNA, complete cds                                                           |
| 34666_at   | 0.49 | 0.45 | 0.40 | Cluster Incl. X07834:Human mRNA for manganese superoxide dismutase (EC 1.15.1.1) /cds=(4,672) /gb=X07834 /gi=36517 /ug=Hs.233578 /len=1026                        |
| 529_at     | 0.49 | 0.67 | 0.49 | U15932 /FEATURE= /DEFINITION=HSU15932 Human dual-specificity protein phosphatase mRNA, complete cds                                                               |
| 32544_s_at | 0.49 | 1.25 | 0.74 | Cluster Incl. L12535:Human RSU-1/RSP-1 mRNA, complete cds /cds=(827,1660) /gb=L12535 /gi=434050 /ug=Hs.75551 /len=2194                                            |
| 38358_at   | 0.49 | 0.86 | 0.80 | Cluster Incl. AJ010840:Homo sapiens mRNA for ATP-dependent RNA helicase, partial /cds=(0,1262) /gb=AJ010840 /gi=3646125 /ug=Hs.99423 /len=1804                    |
| 39661_s_at | 0.49 | 1.21 | 0.65 | Cluster Incl. AF034102:Homo sapiens NBMPR-insensitive nucleoside transporter ei (ENT2) mRNA, complete cds /cds=(237,1607) /gb=AF034102 /gi=2811136                |
| 40459_at   | 0.49 | 0.84 | 0.56 | Cluster Incl. S69189:peroxisomal acyl-coenzyme A oxidase [human, liver, mRNA, 3086 nt] /cds=(52,2037) /gb=S69189 /gi=545593 /ug=Hs.167835 /len=3086               |
| 41713_at   | 0.49 | 0.44 | 0.47 | Cluster Incl. U09848:Human zinc finger protein (ZNF139) mRNA, partial cds /cds=(0,977) /gb=U09848 /gi=495567 /ug=Hs.132390 /len=3505                              |
| 35907_at   | 0.49 | 1.04 | 0.75 | Cluster Incl. Z36714:H.sapiens mRNA for cyclin F /cds=(43,2403) /gb=Z36714 /gi=562752 /ug=Hs.1973 /len=4238                                                       |
| 35303_at   | 0.50 | 1.89 | 1.10 | Cluster Incl. U96876:Homo sapiens insulin induced protein 1 (INSIG1) gene, complete cds /cds=(414,1247) /gb=U96876 /gi=2358268 /ug=Hs.56205 /len=2587             |
| 40946_at   | 0.50 | 1.09 | 0.86 | Cluster Incl. AI023044:ow65c01.s1 Homo sapiens cDNA, 3 end /clone=IMAGE-1651680 /clone_end=3 /gb=AI023044 /gi=3238285 /ug=Hs.194149 /len=572                      |
| 37385_at   | 0.50 | 0.95 | 1.00 | Cluster Incl. U40763:Human Clk-associated RS cyclophilin CARS-Cyp mRNA, complete cds /cds=(485,2749) /gb=U40763 /gi=1117967 /ug=Hs.77965 /len=284                 |
| 40431_at   | 0.50 | 0.68 | 0.51 | Cluster Incl. AB007891:Homo sapiens KIAA0431 mRNA, partial cds /cds=(963,2966) /gb=AB007891 /gi=2887440 /ug=Hs.16349 /len=5350                                    |
| 41083_at   | 0.50 | 0.85 | 0.37 | Cluster Incl. AC006276:Homo sapiens chromosome 19, cosmid R28379 /cds=(0,633) /gb=AC006276 /gi=4096054 /ug=Hs.99093 /len=634                                      |
| 37981_at   | 0.50 | 0.94 | 0.71 | Cluster Incl. D17530:Homo sapiens mRNA for drebrin E, complete cds /cds=(97,2046) /gb=D17530 /gi=498650 /ug=Hs.89434 /len=2553                                    |
| 491_at     | 0.50 | 0.55 | 0.54 | U46116 /FEATURE=mRNA /DEFINITION=HSPTPRG28 Human receptor tyrosine phosphatase gamma (PTPRG) gene, exon 30 and complete cds                                       |
| 39351_at   | 0.50 | 0.79 | 0.49 | Cluster Incl. M84349:Human transmembrane protein (CD59) gene /cds=(18,404) /gb=M84349 /gi=180150 /ug=Hs.119663 /len=1840                                          |
| 37187_at   | 0.50 | 0.65 | 0.40 | Cluster Incl. M36820:Human cytokine (GRO-beta) mRNA, complete cds /cds=(74,397) /gb=M36820 /gi=183628 /ug=Hs.75765 /len=1110                                      |
| 33753_at   | 0.50 | 0.50 | 0.59 | Cluster Incl. AB014566:Homo sapiens mRNA for KIAA0666 protein, partial cds /cds=(0,3259) /gb=AB014566 /gi=3327145 /ug=Hs.197751 /len=4153                         |
| 40754_at   | 0.50 | 0.49 | 0.52 | Cluster Incl. Z30093:H.sapiens mRNA for basic transcription factor 2, 34 kD subunit /cds=(0,911) /gb=Z30093 /gi=1039317 /ug=Hs.90304 /len=912                     |
| 38673_s_at | 0.51 | 0.60 | 0.22 | Cluster Incl. D64137:Human KIP2 gene for Cdk-inhibitor p57KIP2, complete cds (exon1-4) /cds=(111,1028) /gb=D64137 /gi=992945 /ug=Hs.106070 /len=1316              |
| 32151_at   | 0.51 | 0.92 | 0.60 | Cluster Incl. X82260:H.sapiens mRNA for RanGTPase activating protein 1 /cds=(0,1763) /gb=X82260 /gi=575267 /ug=Hs.183800 /len=1764                                |
| 38394_at   | 0.51 | 0.61 | 0.65 | Cluster Incl. D42047:Human mRNA for KIAA0089 gene, partial cds /cds=(0,1236) /gb=D42047 /gi=577306 /ug=Hs.82432 /len=4043                                         |
| 33715_r_at | 0.51 | 0.75 | 0.81 | Cluster Incl. U80017:Homo sapiens basic transcription factor 2 p44 (btf2p44) gene, partial cds, neuronal apoptosis inhibitory protein (naip) and survival motor n |
| 35926_s_at | 0.51 | 0.33 | 0.28 | Cluster Incl. AF004230:Homo sapiens monocyte/macrophage Ig-related receptor MIR-7 (MIR cl-7) mRNA, complete cds /cds=(170,2125) /gb=AF004230 /gi=23               |
| 31864_at   | 0.51 | 0.87 | 0.68 | Cluster Incl. X98263:H.sapiens mRNA for M-phase phosphoprotein, mpp6 /cds=(32,514) /gb=X98263 /gi=1770461 /ug=Hs.152720 /len=1079                                 |
| 38264_at   | 0.51 | 0.74 | 0.66 | Cluster Incl. U74324:Human guanine nucleotide exchange factor mss4 mRNA, complete cds /cds=(3,374) /gb=U74324 /gi=1658190 /ug=Hs.90875 /len=2392                  |
| 36079_at   | 0.51 | 0.65 | 0.47 | Cluster Incl. AF010309:Homo sapiens Pig3 (PIG3) mRNA, complete cds /cds=(527,1495) /gb=AF010309 /gi=2754811 /ug=Hs.50649 /len=1670                                |
| 33543_s_at | 0.51 | 1.03 | 1.04 | Cluster Incl. U77718:Human desmosome associated protein pinin mRNA, complete cds /cds=(30,2261) /gb=U77718 /gi=1684846 /ug=Hs.44499 /len=2617                     |
| 36936_at   | 0.51 | 1.15 | 0.68 | Cluster Incl. U58766:Human FX protein mRNA, complete cds /cds=(74,1039) /gb=U58766 /gi=1381178 /ug=Hs.75801 /len=1330                                             |
| 37021_at   | 0.51 | 0.83 | 0.50 | Cluster Incl. X16832:Human mRNA for cathepsin H (EC 3.4.22.16) /cds=(34,1041) /gb=X16832 /gi=29709 /ug=Hs.76476 /len=1399                                         |
| 34776_at   | 0.52 | 0.62 | 0.49 | Cluster Incl. W27541:32c12 Homo sapiens cDNA /gb=W27541 /gi=1307345 /ug=Hs.3903 /len=982                                                                          |
| 39728_at   | 0.52 | 0.71 | 0.55 | Cluster Incl. J03909:Human gamma-interferon-inducible protein (IP-30) mRNA, complete cds /cds=(40,951) /gb=J03909 /gi=186264 /ug=Hs.14623 /len=1032               |
| 903_at     | 0.52 | 0.52 | 0.40 | L42373 /FEATURE=mRNA /DEFINITION=HUMPP2A Homo sapiens phosphatase 2A B56-alpha (PP2A) mRNA, complete cds                                                          |
| 41745_at   | 0.52 | 1.21 | 0.68 | Cluster Incl. X57352:Human 1-8U gene from interferon-inducible gene family /cds=(237,638) /gb=X57352 /gi=311374 /ug=Hs.182241 /len=808                            |
| 34764_at   | 0.52 | 0.92 | 0.82 | Cluster Incl. D21851:Human mRNA for KIAA0028 gene, partial cds /cds=(185,2896) /gb=D21851 /gi=434766 /ug=Hs.2450 /len=4203                                        |
| 38519_at   | 0.52 | 0.64 | 0.33 | Cluster Incl. U68233:Human farnesol receptor HRR-1 (HRR-1) mRNA, complete cds /cds=(353,1771) /gb=U68233 /gi=1546083 /ug=Hs.171683 /len=2148                      |



|            |      |      |      |                                                                                                                                                          |
|------------|------|------|------|----------------------------------------------------------------------------------------------------------------------------------------------------------|
| 33399_at   | 0.52 | 0.49 | 0.59 | Cluster Incl. AA142942:zl43c04.s1 Homo sapiens cDNA, 3 end /clone=IMAGE-504678 /clone_end=3 /gb=AA142942 /gi=1712320 /ug=Hs.227146 /len=604              |
| 39352_at   | 0.52 | 0.08 | 0.21 | Cluster Incl. S70585:thyroid-stimulating hormone alpha subunit [human, Genomic, 1327 nt 4 segments] /cds=(100,450) /gb=S70585 /gi=1683259 /ug=Hs.1196    |
| 33339_g_at | 0.52 | 0.80 | 0.43 | Cluster Incl. M97936:Human transcription factor ISGF-3 mRNA sequence /cds=UNKNOWN /gb=M97936 /gi=475254 /ug=Hs.21486 /len=2607                           |
| 1452_at    | 0.53 | 0.57 | 0.52 | U24576 /FEATURE= /DEFINITION=U24576 Homo sapiens breast tumor autoantigen (LMO4) mRNA, complete cds                                                      |
| 38908_s_at | 0.53 | 1.49 | 1.25 | Cluster Incl. AL096744:Homo sapiens mRNA; cDNA DKFZp566H033 (from clone DKFZp566H033) /cds=UNKNOWN /gb=AL096744 /gi=5419873 /ug=Hs.1985                  |
| 33720_at   | 0.53 | 0.87 | 0.91 | Cluster Incl. L48692:Homo sapiens (clone p5-23-3) mRNA /cds=UNKNOWN /gb=L48692 /gi=1050998 /ug=Hs.193384 /len=1092                                       |
| 835_at     | 0.53 | 1.32 | 1.05 | U41745 /FEATURE= /DEFINITION=HSU41745 Human PDGF associated protein mRNA, complete cds                                                                   |
| 36658_at   | 0.53 | 0.77 | 0.59 | Cluster Incl. D13643:Human mRNA for KIAA0018 gene, complete cds /cds=(38,1210) /gb=D13643 /gi=285996 /ug=Hs.75616 /len=4186                              |
| 40394_at   | 0.53 | 0.56 | 0.46 | Cluster Incl. L17128:Homo sapiens (clone H4/H16) gamma-glutamic carboxylase mRNA, complete cds /cds=(155,2431) /gb=L17128 /gi=1220308 /ug=Hs.7771        |
| 33421_s_at | 0.53 | 0.76 | 0.59 | Cluster Incl. AB016247:Homo sapiens mRNA for sterol-C5-desaturase, complete cds /cds=(81,980) /gb=AB016247 /gi=3721881 /ug=Hs.227947 /len=2104           |
| 33338_at   | 0.53 | 0.98 | 0.70 | Cluster Incl. M97936:Human transcription factor ISGF-3 mRNA sequence /cds=UNKNOWN /gb=M97936 /gi=475254 /ug=Hs.21486 /len=2607                           |
| 1093_at    | 0.53 | 0.73 | 0.51 | M65254 /FEATURE= /DEFINITION=HUMP2B Protein phosphatase 2A 65 kDa regulatory subunit-beta mRNA, complete cds                                             |
| 41424_at   | 0.54 | 0.57 | 0.32 | Cluster Incl. L48516:Homo sapiens paraoxonase 3 (PON3) mRNA, 3 end of cds /cds=(0,1025) /gb=L48516 /gi=1333633 /ug=Hs.107966 /len=1038                   |
| 38479_at   | 0.54 | 0.84 | 0.73 | Cluster Incl. Y07969:H.sapiens mRNA for APRIL protein /cds=(230,979) /gb=Y07969 /gi=1552325 /ug=Hs.84264 /len=1358                                       |
| 37302_at   | 0.54 | 0.83 | 0.73 | Cluster Incl. U30872:Human mitotin mRNA, complete cds /cds=(72,9413) /gb=U30872 /gi=1000093 /ug=Hs.77204 /len=10189                                      |
| 32230_at   | 0.54 | 0.82 | 0.50 | Cluster Incl. U39067:Homo sapiens translation initiation factor eIF3 p36 subunit mRNA, complete cds /cds=(17,994) /gb=U39067 /gi=1718194 /ug=Hs.192023 / |
| 35839_at   | 0.54 | 1.04 | 0.88 | Cluster Incl. D78130:Homo sapiens mRNA for squalene epoxidase, complete cds /cds=(263,1987) /gb=D78130 /gi=2443315 /ug=Hs.71465 /len=2326                |
| 40273_at   | 0.54 | 0.81 | 0.67 | Cluster Incl. AA485440:zx90g03.s1 Homo sapiens cDNA, 3 end /clone=IMAGE-811060 /clone_end=3 /gb=AA485440 /gi=2214659 /ug=Hs.155402 /len=547              |
| 32860_g_at | 0.54 | 0.85 | 0.69 | Cluster Incl. M97935:Homo sapiens transcription factor ISGF-3 mRNA, complete cds /cds=(196,2448) /gb=M97935 /gi=2281070 /ug=Hs.21486 /len=4003           |
| 871_s_at   | 0.54 | 0.77 | 0.62 | M95585 /FEATURE=mRNA /DEFINITION=HUMHLF Human hepatic leukemia factor (HLF) mRNA, complete cds                                                           |
| 35643_at   | 0.54 | 0.72 | 0.51 | Cluster Incl. X76732:H.sapiens mRNA for NEFA protein /cds=(219,1481) /gb=X76732 /gi=2706486 /ug=Hs.3164 /len=1586                                        |
| 418_at     | 0.54 | 1.08 | 0.65 | X65550 /FEATURE=cds /DEFINITION=HSMKI67 H.sapiens mki67a mRNA (long type) for antigen of monoclonal antibody Ki-67                                       |
| 349_g_at   | 0.54 | 1.02 | 0.84 | D14678 /FEATURE= /DEFINITION=HUMMHCB Human mRNA for kinesin-related protein, partial cds                                                                 |
| 40348_s_at | 0.54 | 0.84 | 1.07 | Cluster Incl. W25866:14c12 Homo sapiens cDNA /gb=W25866 /gi=1305989 /ug=Hs.71331 /len=736                                                                |
| 36985_at   | 0.54 | 1.06 | 0.77 | Cluster Incl. X17025:Human homolog of yeast IPP isomerase /cds=(50,736) /gb=X17025 /gi=488749 /ug=Hs.76038 /len=1807                                     |
| 38195_at   | 0.54 | 1.23 | 0.87 | Cluster Incl. AB018326:Homo sapiens mRNA for KIAA0783 protein, complete cds /cds=(407,3073) /gb=AB018326 /gi=3882286 /ug=Hs.156276 /len=4231             |
| 33701_at   | 0.55 | 0.54 | 0.39 | Cluster Incl. U49897:Homo sapiens phenylalanine hydroxylase (PAH) mRNA, complete cds /cds=(472,1830) /gb=U49897 /gi=2462721 /ug=Hs.1870 /len=2680        |
| 40195_at   | 0.55 | 0.95 | 0.52 | Cluster Incl. X14850:Human H2A.X mRNA encoding histone H2A.X /cds=(73,504) /gb=X14850 /gi=31972 /ug=Hs.147097 /len=1585                                  |
| 1265_g_at  | 0.55 | 0.89 | 0.73 | M25393 /FEATURE= /DEFINITION=HUMPTPASE Human protein tyrosine phosphatase (PTPase) mRNA, complete cds                                                    |
| 37325_at   | 0.55 | 1.23 | 0.69 | Cluster Incl. D14697:Human mRNA for KIAA0003 gene, complete cds /cds=(114,1373) /gb=D14697 /gi=285964 /ug=Hs.77393 /len=1430                             |
| 37234_at   | 0.55 | 0.46 | 0.22 | Cluster Incl. K02566:Human alpha-2-thiol proteinase inhibitor mRNA, complete coding sequence /cds=(49,1332) /gb=K02566 /gi=177889 /ug=Hs.77741 /len=1    |
| 36174_at   | 0.55 | 0.77 | 0.58 | Cluster Incl. X70326:H.sapiens MacMarcks mRNA /cds=(13,600) /gb=X70326 /gi=38434 /ug=Hs.75061 /len=1334                                                  |
| 37235_g_at | 0.55 | 0.47 | 0.28 | Cluster Incl. K02566:Human alpha-2-thiol proteinase inhibitor mRNA, complete coding sequence /cds=(49,1332) /gb=K02566 /gi=177889 /ug=Hs.77741 /len=1    |
| 38725_s_at | 0.55 | 0.94 | 0.58 | Cluster Incl. N36295:yx99b12.r1 Homo sapiens cDNA, 5 end /clone=IMAGE-269855 /clone_end=5 /gb=N36295 /gi=1157437 /ug=Hs.108973 /len=660                  |
| 32063_at   | 0.55 | 0.86 | 0.55 | Cluster Incl. M86546:H.sapiens PBX1a and PBX1b mRNA, complete cds /cds=(123,1415) /gb=M86546 /gi=189647 /ug=Hs.155691 /len=1819                          |
| 40966_at   | 0.55 | 0.66 | 0.55 | Cluster Incl. AF099989:Homo sapiens Ste-20 related kinase SPAK mRNA, complete cds /cds=(173,1816) /gb=AF099989 /gi=3851170 /ug=Hs.199263 /len=32         |
| 1647_at    | 0.55 | 1.03 | 0.69 | U51903 /FEATURE= /DEFINITION=HSU51903 Human RasGAP-related protein (IQGAP2) mRNA, complete cds                                                           |
| 831_at     | 0.55 | 1.16 | 1.12 | U28042 /FEATURE= /DEFINITION=HSU28042 Human DEAD box RNA helicase-like protein mRNA, complete cds                                                        |
| 39760_at   | 0.56 | 0.37 | 0.39 | Cluster Incl. AL031781:dJ51J12.1.3 (human ortholog of mouse KH Domain RNA Binding protein QKI-7 (isoform 3)) /cds=(0,692) /gb=AL031781 /gi=4038570 /u    |
| 38414_at   | 0.56 | 1.12 | 0.54 | Cluster Incl. U05340:Human p53CDC mRNA, complete cds /cds=(110,1609) /gb=U05340 /gi=468031 /ug=Hs.82906 /len=1686                                        |
| 2042_s_at  | 0.56 | 1.28 | 1.10 | M15024 /FEATURE= /DEFINITION=HUMCMYBLA Human c-myc mRNA, complete cds                                                                                    |
| 34594_at   | 0.56 | 1.00 | 0.69 | Cluster Incl. D13644:Human mRNA for KIAA0019 gene, complete cds /cds=(279,2765) /gb=D13644 /gi=1531551 /ug=Hs.5174 /len=4602                             |
| 1644_at    | 0.56 | 0.91 | 0.53 | U36764 /FEATURE= /DEFINITION=HSU36764 Human TGF-beta receptor interacting protein 1 mRNA, complete cds                                                   |
| 39960_at   | 0.56 | 0.69 | 0.65 | Cluster Incl. AF091086:Homo sapiens clone 640 unknown mRNA, complete sequence /cds=(290,685) /gb=AF091086 /gi=3860009 /ug=Hs.44563 /len=1307             |
| 37505_at   | 0.56 | 0.92 | 0.59 | Cluster Incl. L76571:Homo sapiens nuclear hormone receptor (shp) gene, 3 end of cds /cds=(0,772) /gb=L76571 /gi=1374878 /ug=Hs.11930 /len=773            |
| 38201_at   | 0.56 | 0.58 | 0.58 | Cluster Incl. U21551:Human ECA39 mRNA, complete cds /cds=(0,1154) /gb=U21551 /gi=1036779 /ug=Hs.157205 /len=1155                                         |
| 38041_at   | 0.56 | 0.77 | 0.61 | Cluster Incl. U41514:Human UDP-GalNAc-polyprotein N-acetylgalactosaminyltransferase mRNA, complete cds /cds=(31,1710) /gb=U41514 /gi=1136284 /ug=        |

|            |      |      |      |                                                                                                                                                          |
|------------|------|------|------|----------------------------------------------------------------------------------------------------------------------------------------------------------|
| 33370_r_at | 0.56 | 0.63 | 0.71 | Cluster Incl. U60205:Human methyl sterol oxidase (ERG25) mRNA, complete cds /cds=(26,907) /gb=U60205 /gi=1408205 /ug=Hs.223018 /len=1751                 |
| 34157_f_at | 0.56 | 1.27 | 0.42 | Cluster Incl. AI200373:qf98c03.x1 Homo sapiens cDNA, 3 end /clone=IMAGE-1758052 /clone_end=3 /gb=AI200373 /gi=3752979 /ug=Hs.233568 /len=488             |
| 39064_at   | 0.56 | 0.99 | 0.55 | Cluster Incl. L38928:Homo sapiens 5,10-methenyltetrahydrofolate synthetase mRNA, complete cds /cds=(13,624) /gb=L38928 /gi=886296 /ug=Hs.118131 /len=    |
| 32587_at   | 0.56 | 0.63 | 0.57 | Cluster Incl. U07802:Human Tis11d gene, complete cds /cds=(291,1739) /gb=U07802 /gi=984508 /ug=Hs.78909 /len=3655                                        |
| 35023_at   | 0.57 | 0.97 | 0.83 | Cluster Incl. U00803:Human SRC-like tyrosine kinase (FRK) mRNA, complete cds /cds=(447,1964) /gb=U00803 /gi=392887 /ug=Hs.89426 /len=2847                |
| 37042_at   | 0.57 | 1.28 | 0.60 | Cluster Incl. U09577:Homo sapiens lysosomal hyaluronidase (LUCA2/HYAL2) mRNA, complete cds /cds=(106,1527) /gb=U09577 /gi=3702076 /ug=Hs.76873 /         |
| 38563_at   | 0.57 | 1.04 | 0.69 | Cluster Incl. AF039652:Homo sapiens ribonuclease H type II mRNA, complete cds /cds=(81,941) /gb=AF039652 /gi=3004980 /ug=Hs.178655 /len=1142             |
| 34818_at   | 0.57 | 0.46 | 0.50 | Cluster Incl. X96381:H.sapiens erm gene, exon 2,3,4,5 (and joined CDS) /cds=(223,1755) /gb=X96381 /gi=1418781 /ug=Hs.43697 /len=4071                     |
| 41407_at   | 0.57 | 1.10 | 0.62 | Cluster Incl. L03411:Human RD protein (RD) mRNA, complete cds /cds=(86,1228) /gb=L03411 /gi=190973 /ug=Hs.106061 /len=1301                               |
| 893_at     | 0.57 | 1.23 | 0.82 | M91670 /FEATURE= /DEFINITION=HUME2EPI Human ubiquitin carrier protein (E2-EPF) mRNA, complete cds                                                        |
| 34898_at   | 0.57 | 1.85 | 1.93 | Cluster Incl. M30704:Human amphiregulin (AR) mRNA, complete cds, clones lambda-AR1 and lambda-AR2 /cds=(209,967) /gb=M30704 /gi=179039 /ug=Hs.1:         |
| 31814_i_at | 0.57 | 0.95 | 0.37 | Cluster Incl. AB009462:Homo sapiens hLRp105 mRNA for LDL receptor related protein 105, complete cds /cds=(226,2538) /gb=AB009462 /gi=3413957 /ug=H       |
| 32113_at   | 0.57 | 0.33 | 0.31 | Cluster Incl. U83115:Human non-lens beta gamma-crystallin like protein (AIM1) mRNA, partial cds /cds=(0,4913) /gb=U83115 /gi=2072424 /ug=Hs.161002 /len  |
| 502_s_at   | 0.58 | 0.76 | 0.71 | U37431 /FEATURE=mRNA#1 /DEFINITION=HSU37431 Human HOXA1 mRNA, long transcript and alternatively spliced forms, complete cds                              |
| 36488_at   | 0.58 | 0.83 | 0.76 | Cluster Incl. AB011542:Homo sapiens mRNA for MEGF9, partial cds /cds=(0,1129) /gb=AB011542 /gi=3449309 /ug=Hs.5599 /len=5507                             |
| 34192_at   | 0.58 | 0.77 | 0.57 | Cluster Incl. AB011104:Homo sapiens mRNA for KIAA0532 protein, partial cds /cds=(0,4913) /gb=AB011104 /gi=3043587 /ug=Hs.21077 /len=6827                 |
| 41084_at   | 0.58 | 1.02 | 0.36 | Cluster Incl. AI659108:tu08c09.x1 Homo sapiens cDNA, 3 end /clone=IMAGE-2250448 /clone_end=3 /gb=AI659108 /gi=4762678 /ug=Hs.99093 /len=492              |
| 36858_at   | 0.58 | 0.98 | 0.89 | Cluster Incl. D25218:Human mRNA for KIAA0112 gene, partial cds /cds=(0,1201) /gb=D25218 /gi=434778 /ug=Hs.71827 /len=1696                                |
| 37699_at   | 0.58 | 0.91 | 1.06 | Cluster Incl. U29607:Human methionine aminopeptidase mRNA, complete cds /cds=(22,1458) /gb=U29607 /gi=903981 /ug=Hs.78935 /len=2569                      |
| 40516_at   | 0.58 | 0.87 | 0.85 | Cluster Incl. L19872:Human AH-receptor mRNA, complete cds /cds=(375,2921) /gb=L19872 /gi=416141 /ug=Hs.170087 /len=5228                                  |
| 35823_at   | 0.59 | 0.93 | 0.63 | Cluster Incl. M63573:Human secreted cyclophilin-like protein (SCYLP) mRNA, complete cds /cds=(21,671) /gb=M63573 /gi=337998 /ug=Hs.699 /len=893          |
| 34202_at   | 0.59 | 0.45 | 0.44 | Cluster Incl. AL050071:Human sapiens mRNA; cDNA DKFZp566B0846 (from clone DKFZp566B0846) /cds=(0,1225) /gb=AL050071 /gi=4884302 /ug=Hs.21201             |
| 41771_g_at | 0.59 | 0.70 | 0.60 | Cluster Incl. AA420624:nc61c12.r1 Homo sapiens cDNA /clone=IMAGE-745750 /gb=AA420624 /gi=2094502 /ug=Hs.183109 /len=533                                  |
| 1710_s_at  | 0.59 | 0.86 | 0.66 | U07804 /FEATURE= /DEFINITION=HSU07804 Human DNA topoisomerase I mRNA, partial cds                                                                        |
| 37984_s_at | 0.59 | 0.64 | 0.34 | Cluster Incl. M57763:Human ADP-ribosylation factor (hARF6) mRNA, complete cds /cds=(517,1044) /gb=M57763 /gi=178988 /ug=Hs.89474 /len=1194               |
| 37949_at   | 0.59 | 0.92 | 0.81 | Cluster Incl. J03798:Human autoantigen small nuclear ribonucleoprotein Sm-D mRNA, complete cds /cds=(150,509) /gb=J03798 /gi=338264 /ug=Hs.86948 /len    |
| 37882_at   | 0.59 | 1.05 | 0.91 | Cluster Incl. X63468:H.sapiens mRNA for transcription factor TFIIE alpha /cds=(54,1373) /gb=X63468 /gi=37067 /ug=Hs.145381 /len=2969                     |
| 1030_s_at  | 0.59 | 1.04 | 0.78 | U07806 /FEATURE= /DEFINITION=HSU07806 Human camptothecin resistant clone CEM/C2 DNA topoisomerase I mRNA, partial cds                                    |
| 41363_at   | 0.59 | 1.03 | 0.94 | Cluster Incl. AF027150:Homo sapiens survival of motor neuron protein interacting protein 1 (SIP1) mRNA, complete cds /cds=(83,925) /gb=AF027150 /gi=2570 |
| 40490_at   | 0.59 | 0.95 | 1.15 | Cluster Incl. U41387:Human Gu protein mRNA, partial cds /cds=(0,2405) /gb=U41387 /gi=1230563 /ug=Hs.169531 /len=3288                                     |
| 34459_at   | 0.59 | 0.56 | 0.56 | Cluster Incl. U50529:Human BRCA2 region, mRNA sequence CG016 /cds=UNKNOWN /gb=U50529 /gi=1531600 /ug=Hs.112434 /len=2812                                 |
| 36091_at   | 0.59 | 0.62 | 0.49 | Cluster Incl. AF051323:Homo sapiens Src-associated adaptor protein (SAPS) mRNA, complete cds /cds=(172,1251) /gb=AF051323 /gi=4091777 /ug=Hs.5264        |
| 39012_g_at | 0.59 | 0.63 | 0.57 | Cluster Incl. X99906:Homo sapiens mRNA for alpha endosulfine /cds=(125,490) /gb=X99906 /gi=2764973 /ug=Hs.111680 /len=749                                |
| 37728_r_at | 0.59 | 1.11 | 1.07 | Cluster Incl. X78669:H.sapiens ERC-55 mRNA /cds=(66,1019) /gb=X78669 /gi=469884 /ug=Hs.79088 /len=1700                                                   |
| 34848_at   | 0.59 | 1.14 | 0.65 | Cluster Incl. X69141:H.sapiens mRNA for squalene synthase /cds=(91,1344) /gb=X69141 /gi=435676 /ug=Hs.48876 /len=2033                                    |
| 40563_at   | 0.59 | 0.72 | 0.41 | Cluster Incl. AL050007:Homo sapiens mRNA; cDNA DKFZp564A043 (from clone DKFZp564A043) /cds=(0,296) /gb=AL050007 /gi=4884076 /ug=Hs.169329 /len           |
| 38127_at   | 0.59 | 1.24 | 0.62 | Cluster Incl. Z48199:H.sapiens syndecan-1 gene (exons 2-5) /cds=(0,866) /gb=Z48199 /gi=666051 /ug=Hs.82109 /len=2802                                     |
| 37971_at   | 0.60 | 1.02 | 0.89 | Cluster Incl. AL050089:Homo sapiens mRNA; cDNA DKFZp586E0518 (from clone DKFZp586E0518) /cds=(0,2435) /gb=AL050089 /gi=4884107 /ug=Hs.8858 /             |
| 37434_at   | 0.60 | 0.92 | 0.80 | Cluster Incl. W28907:53e12 Homo sapiens cDNA /gb=W28907 /gi=1308855 /ug=Hs.111429 /len=989                                                               |
| 38586_at   | 0.60 | 1.77 | 0.32 | Cluster Incl. M10050:Human liver fatty acid binding protein (FABP) mRNA, complete cds /cds=(42,425) /gb=M10050 /gi=182355 /ug=Hs.182167 /len=489         |
| 1586_at    | 0.60 | 0.67 | 0.40 | M35878 /FEATURE=expanded_cds /DEFINITION=HUMIBP3 Human insulin-like growth factor-binding protein-3 gene, complete cds, clone HL1006d                    |
| 38099_r_at | 0.60 | 0.89 | 0.78 | Cluster Incl. AF030555:Homo sapiens acyl-CoA synthetase 4 (ACS4) mRNA, complete cds /cds=(317,2329) /gb=AF030555 /gi=3158350 /ug=Hs.81452 /len=51        |
| 32251_at   | 0.60 | 0.88 | 0.72 | Cluster Incl. AA149307:z125h05.s1 Homo sapiens cDNA, 3 end /clone=IMAGE-503001 /clone_end=3 /gb=AA149307 /gi=1719883 /ug=Hs.194329 /len=626              |
| 38178_at   | 0.60 | 0.36 | 0.26 | Cluster Incl. L40802:Homo sapiens 17-beta-hydroxysteroid dehydrogenase (17-HSD) gene /cds=(167,1330) /gb=L40802 /gi=1008837 /ug=Hs.155109 /len=142       |
| 34997_r_at | 0.60 | 0.72 | 0.74 | Cluster Incl. U43318:Human putative transmembrane receptor (frizzled 5) mRNA, complete cds /cds=(320,2077) /gb=U43318 /gi=1151251 /ug=Hs.152251 /len     |
| 38257_at   | 0.60 | 0.97 | 0.54 | Cluster Incl. AF038406:Homo sapiens NADH dehydrogenase-ubiquinone Fe-S protein 8 23 kDa subunit (NDUFS8) gene, nuclear gene encoding mitochondrial       |
| 40621_at   | 0.60 | 0.63 | 0.77 | Cluster Incl. U63809:Homo sapiens prostate apoptosis response protein par-4 mRNA, complete cds /cds=(238,1266) /gb=U63809 /gi=3282204 /ug=Hs.176090      |

|            |      |      |      |                                                                                                                                                      |
|------------|------|------|------|------------------------------------------------------------------------------------------------------------------------------------------------------|
| 894_g_at   | 0.60 | 1.21 | 0.90 | M91670 /FEATURE= /DEFINITION=HUME2EPI Human ubiquitin carrier protein (E2-EPF) mRNA, complete cds                                                    |
| 32252_at   | 0.60 | 0.49 | 0.36 | Cluster Incl. D00096:Homo sapiens mRNA for prealbumin, complete cds /cds=(26,469) /gb=D00096 /gi=2951758 /ug=Hs.194366 /len=615                      |
| 33737_f_at | 0.60 | 0.76 | 0.75 | Cluster Incl. AI871359:wI81b11.x1 Homo sapiens cDNA, 3 end /clone=IMAGE-2431293 /clone_end=3 /gb=AI871359 /gi=5545408 /ug=Hs.195484 /len=526         |
| 39967_at   | 0.61 | 0.66 | 0.54 | Cluster Incl. AB019527:Homo sapiens mRNA for LDOC1 protein, complete cds /cds=(104,544) /gb=AB019527 /gi=3869126 /ug=Hs.45231 /len=1370              |
| 40606_at   | 0.61 | 0.98 | 0.86 | Cluster Incl. U88629:Human RNA polymerase II elongation factor ELL2, complete cds /cds=(0,1922) /gb=U88629 /gi=1946346 /ug=Hs.173334 /len=1923       |
| 40619_at   | 0.61 | 1.33 | 0.85 | Cluster Incl. M91670:Human ubiquitin carrier protein (E2-EPF) mRNA, complete cds /cds=(59,736) /gb=M91670 /gi=181915 /ug=Hs.174070 /len=890          |
| 40893_at   | 0.61 | 1.02 | 0.75 | Cluster Incl. AF058953:Homo sapiens ATP-specific succinyl-CoA synthetase beta subunit (SCS) mRNA, partial cds /cds=(0,1280) /gb=AF058953 /gi=3766196 |
| 2056_at    | 0.61 | 0.64 | 0.56 | M34641 /FEATURE= /DEFINITION=HUMFGF1A Human fibroblast growth factor (FGF) receptor-1 mRNA, complete cds                                             |
| 32135_at   | 0.61 | 0.92 | 0.78 | Cluster Incl. U00968:Human SREBP-1 mRNA, complete cds /cds=(166,3609) /gb=U00968 /gi=409404 /ug=Hs.166 /len=4154                                     |
| 35951_at   | 0.61 | 0.73 | 0.50 | Cluster Incl. AB018286:Homo sapiens mRNA for KIAA0743 protein, complete cds /cds=(491,3676) /gb=AB018286 /gi=3882206 /ug=Hs.22269 /len=4149          |
| 36171_at   | 0.61 | 0.79 | 0.71 | Cluster Incl. AI521453:th60h07.x1 Homo sapiens cDNA, 3 end /clone=IMAGE-2122717 /clone_end=3 /gb=AI521453 /gi=4435588 /ug=Hs.74861 /len=622          |
| 31866_at   | 0.61 | 1.33 | 0.95 | Cluster Incl. AC005239:Homo sapiens chromosome 19, cosmid F23149 /cds=(0,1532) /gb=AC005239 /gi=3287673 /ug=Hs.152894 /len=1533                      |
| 40139_at   | 0.61 | 0.63 | 0.61 | Cluster Incl. U88966:Human protein rapamycin associated protein (FRAP2) gene, complete cds /cds=(79,7725) /gb=U88966 /gi=3282238 /ug=Hs.155952 /len= |
| 31897_at   | 0.61 | 0.56 | 0.64 | Cluster Incl. U53445:Human ovarian cancer downregulated myosin heavy chain homolog (Doc1) mRNA, complete cds /cds=(134,2392) /gb=U53445 /gi=12973    |
| 527_at     | 0.61 | 1.04 | 0.68 | U14518 /FEATURE= /DEFINITION=HSU14518 Human centromere protein-A (CENP-A) mRNA, complete cds                                                         |
| 674_g_at   | 0.61 | 1.09 | 1.00 | J04031 /FEATURE= /DEFINITION=HUMMDMCSF Human methylenetetrahydrofolate dehydrogenase- methenyltetrahydrofolate cyclohydrolase-formyltetrahy          |
| 38754_at   | 0.61 | 0.69 | 0.53 | Cluster Incl. AI557295:PT.2.1_16_D02.r Homo sapiens cDNA, 3 end /clone_end=3 /gb=AI557295 /gi=4489658 /ug=Hs.8603 /len=847                           |
| 35576_f_at | 0.61 | 0.62 | 0.55 | Cluster Incl. AL009179:dJ97D16.4 (Histone H2B) /cds=(25,405) /gb=AL009179 /gi=3217024 /ug=Hs.137594 /len=488                                         |
| 41223_at   | 0.61 | 1.00 | 0.77 | Cluster Incl. M22760:Homo sapiens nuclear-encoded mitochondrial cytochrome c oxidase Va subunit mRNA, complete cds /cds=(19,471) /gb=M22760 /gi=695  |
| 36490_s_at | 0.61 | 1.19 | 1.06 | Cluster Incl. X15331:Human mRNA for phosphoribosylpyrophosphate synthetase subunit one /cds=(66,1022) /gb=X15331 /gi=35701 /ug=Hs.56 /len=1196       |
| 32186_at   | 0.61 | 0.85 | 1.09 | Cluster Incl. M80244:Human E16 mRNA, complete cds /cds=(310,1035) /gb=M80244 /gi=181907 /ug=Hs.184601 /len=3984                                      |
| 32845_at   | 0.61 | 0.71 | 0.54 | Cluster Incl. M85289:Human heparan sulfate proteoglycan (HSPG2) mRNA, complete cds /cds=(80,13255) /gb=M85289 /gi=184426 /ug=Hs.211573 /len=1432     |
| 35628_at   | 0.61 | 0.94 | 0.55 | Cluster Incl. AF023676:Homo sapiens lamin B receptor homolog TM7SF2 (TM7SF2) mRNA, complete cds /cds=(254,2023) /gb=AF023676 /gi=3211721 /ug=H       |
| 34841_at   | 0.62 | 0.95 | 0.70 | Cluster Incl. AC002544:Homo sapiens Chromosome 16 BAC clone CIT987SK-A-761H5 /cds=(85,2826) /gb=AC002544 /gi=3337382 /ug=Hs.4835 /len=3027           |
| 37632_s_at | 0.62 | 1.51 | 1.07 | Cluster Incl. X98260:H.sapiens mRNA for M-phase phosphoprotein, mpp11 /cds=(0,1750) /gb=X98260 /gi=1770453 /ug=Hs.82254 /len=1845                    |
| 33193_at   | 0.62 | 0.50 | 0.55 | Cluster Incl. AW052084:wy86f07.x1 Homo sapiens cDNA, 3 end /clone=IMAGE-2555461 /clone_end=3 /gb=AW052084 /gi=5914443 /ug=Hs.9398 /len=586           |
| 34865_at   | 0.62 | 1.20 | 0.78 | Cluster Incl. AI360249:qy84f07.x1 Homo sapiens cDNA, 3 end /clone=IMAGE-2018725 /clone_end=3 /gb=AI360249 /gi=4111870 /ug=Hs.49767 /len=530          |
| 38354_at   | 0.62 | 0.62 | 0.58 | Cluster Incl. X52560:Human gene for nuclear factor NF-IL6 /cds=(0,1037) /gb=X52560 /gi=35035 /ug=Hs.99029 /len=1038                                  |
| 35803_at   | 0.62 | 0.69 | 0.76 | Cluster Incl. S82240:RhoE=26 kda GTPase homolog [human, HeLa cell line, mRNA, 833 nt] /cds=(24,713) /gb=S82240 /gi=1839516 /ug=Hs.6838 /len=833      |
| 497_at     | 0.62 | 0.93 | 0.39 | U32680 /FEATURE= /DEFINITION=HSU32680 Human CLN3 mRNA, complete cds                                                                                  |
| 37727_i_at | 0.62 | 0.98 | 0.76 | Cluster Incl. X78669:H.sapiens ERC-55 mRNA /cds=(66,1019) /gb=X78669 /gi=469884 /ug=Hs.79088 /len=1700                                               |
| 1599_at    | 0.62 | 0.86 | 0.61 | L25876 /FEATURE= /DEFINITION=HUMPTPB Homo sapiens protein tyrosine phosphatase (CIP2)mRNA, complete cds                                              |
| 37701_at   | 0.62 | 0.86 | 0.93 | Cluster Incl. L13463:Human helix-loop-helix basic phosphoprotein (G0S8) mRNA, complete cds /cds=(32,667) /gb=L13463 /gi=292054 /ug=Hs.78944 /len=134 |
| 34647_at   | 0.62 | 1.10 | 0.86 | Cluster Incl. X52104:Human mRNA for p68 protein /cds=(175,2019) /gb=X52104 /gi=35219 /ug=Hs.76053 /len=2330                                          |
| 40767_at   | 0.62 | 0.95 | 0.65 | Cluster Incl. M59499:Human lipoprotein-associated coagulation inhibitor (LACI) gene /cds=(2,916) /gb=M59499 /gi=187205 /ug=Hs.170279 /len=3599       |
| 37236_at   | 0.62 | 0.36 | 0.29 | Cluster Incl. M11437:Human kininogen gene /cds=(0,1934) /gb=M11437 /gi=186752 /ug=Hs.77741 /len=1935                                                 |
| 38124_at   | 0.62 | 1.04 | 0.61 | Cluster Incl. X55110:Human mRNA for neurite outgrowth-promoting protein /cds=(25,456) /gb=X55110 /gi=35086 /ug=Hs.82045 /len=786                     |
| 39165_at   | 0.62 | 0.88 | 0.68 | Cluster Incl. U47101:Human NifU-like protein (hNifU) mRNA, partial cds /cds=(0,366) /gb=U47101 /gi=1685101 /ug=Hs.9908 /len=819                      |
| 41770_at   | 0.62 | 0.65 | 0.60 | Cluster Incl. AA420624:nc61c12.r1 Homo sapiens cDNA /clone=IMAGE-745750 /gb=AA420624 /gi=2094502 /ug=Hs.183109 /len=533                              |
| 38046_at   | 0.62 | 1.04 | 0.92 | Cluster Incl. AJ005579:Homo sapiens mRNA for Prer protein /cds=(0,1673) /gb=AJ005579 /gi=4090238 /ug=Hs.8024 /len=1674                               |
| 35913_at   | 0.62 | 0.84 | 0.51 | Cluster Incl. U88047:Homo sapiens DNA binding protein homolog (DRIL1) mRNA, complete cds /cds=(200,1981) /gb=U88047 /gi=2529687 /ug=Hs.198515 /ler   |
| 36930_at   | 0.62 | 1.17 | 1.04 | Cluster Incl. L05425:Homo sapiens autoantigen mRNA, complete cds /cds=(79,2274) /gb=L05425 /gi=179284 /ug=Hs.75528 /len=2313                         |
| 36001_at   | 0.62 | 1.23 | 0.86 | Cluster Incl. Y18643:Homo sapiens mRNA for methyltransferase-like protein 1 /cds=(48,878) /gb=Y18643 /gi=4160183 /ug=Hs.42957 /len=1292              |
| 40439_at   | 0.62 | 1.01 | 0.55 | Cluster Incl. AF047469:Homo sapiens arsenite translocating ATPase (ASNA1) mRNA, complete cds /cds=(8,1054) /gb=AF047469 /gi=2905656 /ug=Hs.165439    |
| 1375_s_at  | 0.63 | 0.95 | 0.52 | M32304 /FEATURE= /DEFINITION=HUMMET Human metalloproteinase inhibitor mRNA, complete cds                                                             |
| 218_at     | 0.63 | 1.12 | 0.91 | S74221 /FEATURE= /DEFINITION=S74221 IK=IK factor [human, leukemic cells K562, chronic myeloid leukemia patient, mRNA, 756 nt]                        |
| 1291_s_at  | 0.63 | 0.81 | 0.47 | L03840 /FEATURE= /DEFINITION=HUMFGFR4X Human fibroblast growth factor receptor 4 (FGFR4) mRNA, complete cds                                          |



|           |      |      |      |                                                                                                                                                             |
|-----------|------|------|------|-------------------------------------------------------------------------------------------------------------------------------------------------------------|
| 39397_at  | 0.63 | 1.09 | 0.94 | Cluster Incl. M64497:Human apolipoprotein AI regulatory protein (ARP-1) mRNA, complete cds /cds=(342,1586) /gb=M64497 /gi=179023 /ug=Hs.1255 /len=17        |
| 38940_at  | 0.63 | 0.94 | 0.60 | Cluster Incl. N58115:yv65a01.s1 Homo sapiens cDNA, 3 end /clone=IMAGE-247560 /clone_end=3 /gb=N58115 /gi=1202005 /ug=Hs.21137 /len=588                      |
| 32156_at  | 0.63 | 0.88 | 0.74 | Cluster Incl. AF044968:untitled /cds=(0,1351) /gb=AF044968 /gi=3941380 /ug=Hs.183986 /len=1352                                                              |
| 38311_at  | 0.63 | 0.99 | 0.63 | Cluster Incl. AF055012:Homo sapiens clone 24615 mRNA sequence /cds=UNKNOWN /gb=AF055012 /gi=3005735 /ug=Hs.94785 /len=1757                                  |
| 40710_at  | 0.63 | 0.69 | 0.56 | Cluster Incl. D86322:Homo sapiens mRNA for calmegin, complete cds /cds=(101,1933) /gb=D86322 /gi=2467376 /ug=Hs.86368 /len=2710                             |
| 35694_at  | 0.63 | 0.99 | 0.79 | Cluster Incl. AB014587:Homo sapiens mRNA for KIAA0687 protein, partial cds /cds=(0,3527) /gb=AB014587 /gi=3327187 /ug=Hs.3628 /len=4266                     |
| 34387_at  | 0.63 | 0.86 | 0.65 | Cluster Incl. D86960:Human mRNA for KIAA0205 gene, complete cds /cds=(227,1339) /gb=D86960 /gi=1503993 /ug=Hs.3610 /len=6253                                |
| 40354_at  | 0.63 | 1.10 | 1.00 | Cluster Incl. AB023421:Homo sapiens mRNA for heat shock protein apg-1, complete cds /cds=(54,2573) /gb=AB023421 /gi=4579910 /ug=Hs.71992 /len=3068          |
| 1154_at   | 0.63 | 1.04 | 0.78 | J02645 /FEATURE=mRNA /DEFINITION=HUMEIF2A Human translational initiation factor (eIF-2), alpha subunit mRNA, complete cds                                   |
| 32618_at  | 0.63 | 0.94 | 0.64 | Cluster Incl. X93086:H.sapiens mRNA for biliverdin IX alpha reductase /cds=(60,950) /gb=X93086 /gi=1246748 /ug=Hs.81029 /len=1053                           |
| 40876_at  | 0.63 | 0.59 | 0.59 | Cluster Incl. U31525:Human glycogenin mRNA, complete cds /cds=(127,1128) /gb=U31525 /gi=976399 /ug=Hs.174071 /len=1827                                      |
| 37994_at  | 0.63 | 1.12 | 0.73 | Cluster Incl. X69962:H.sapiens FMR-1 mRNA /cds=(219,2117) /gb=X69962 /gi=296587 /ug=Hs.89764 /len=4362                                                      |
| 843_at    | 0.63 | 0.81 | 0.74 | U48296 /FEATURE= /DEFINITION=HSU48296 Homo sapiens protein tyrosine phosphatase PTPCAAX1 (hPTPCAAX1) mRNA, complete cds                                     |
| 37330_at  | 0.63 | 0.88 | 0.46 | Cluster Incl. U24266:Human pyrroline-5-carboxylate dehydrogenase (P5CDh) mRNA, long form, complete cds /cds=(30,1721) /gb=U24266 /gi=1353247 /ug=H          |
| 37422_at  | 0.63 | 0.75 | 0.70 | Cluster Incl. S71018:cyclophilin C [human, kidney, mRNA, 883 nt] /cds=(164,802) /gb=S71018 /gi=547303 /ug=Hs.110364 /len=883                                |
| 34563_at  | 0.64 | 0.74 | 0.62 | Cluster Incl. D26361:Human mRNA for KIAA0042 gene, complete cds /cds=(439,5385) /gb=D26361 /gi=452516 /ug=Hs.3104 /len=6586                                 |
| 37561_at  | 0.64 | 1.05 | 0.80 | Cluster Incl. AL031778:dJ34B21.4.1 (nuclear transcription factor Y, alpha (CCAAT-Binding transcription factor subunit B, CBF-B, CAAT-Box DNA binding pr /cc |
| 37334_at  | 0.64 | 1.07 | 0.76 | Cluster Incl. U23803:Human heterogeneous ribonucleoprotein A0 mRNA, complete cds /cds=(264,1181) /gb=U23803 /gi=773643 /ug=Hs.77492 /len=1714               |
| 1368_at   | 0.64 | 0.85 | 0.67 | M27492 /FEATURE= /DEFINITION=HUMIL1RA Human interleukin 1 receptor mRNA, complete cds                                                                       |
| 1696_at   | 0.64 | 1.12 | 0.73 | D29013 /FEATURE= /DEFINITION=HUMLNCAP Human mRNA for DNA polymerase beta, complete cds                                                                      |
| 36135_at  | 0.64 | 1.75 | 1.13 | Cluster Incl. U86602:Human nucleolar protein p40 mRNA, complete cds /cds=(142,1062) /gb=U86602 /gi=1835785 /ug=Hs.74407 /len=1325                           |
| 33906_at  | 0.64 | 1.27 | 0.70 | Cluster Incl. AB001740:Homo sapiens mRNA for p27, complete cds /cds=(20,619) /gb=AB001740 /gi=2982672 /ug=Hs.25723 /len=661                                 |
| 35315_at  | 0.64 | 0.81 | 0.53 | Cluster Incl. X02544:Human mRNA for alpha1-acid glycoprotein (orosomucoid) /cds=(78,683) /gb=X02544 /gi=24444 /ug=Hs.572 /len=803                           |
| 37228_at  | 0.64 | 1.02 | 0.68 | Cluster Incl. U01038:Human pLK mRNA, complete cds /cds=(63,1874) /gb=U01038 /gi=393016 /ug=Hs.77597 /len=2178                                               |
| 868_at    | 0.64 | 1.02 | 0.45 | U13991 /FEATURE= /DEFINITION=HSU13991 Human TATA-binding protein associated factor 30 kDa subunit (tafl130) mRNA, complete cds                              |
| 35791_at  | 0.64 | 0.97 | 0.67 | Cluster Incl. AF038961:Homo sapiens SL15 protein mRNA, complete cds /cds=(16,759) /gb=AF038961 /gi=3329391 /ug=Hs.6710 /len=1397                            |
| 33809_at  | 0.64 | 1.43 | 0.91 | Cluster Incl. AL049933:Homo sapiens mRNA; cDNA DKFZp564K1216 (from clone DKFZp564K1216) /cds=(315,1379) /gb=AL049933 /gi=4884070 /ug=Hs.203                 |
| 36977_at  | 0.64 | 0.87 | 0.65 | Cluster Incl. U39412:Homo sapiens alpha SNAP mRNA, complete cds /cds=(67,954) /gb=U39412 /gi=3929616 /ug=Hs.75932 /len=1258                                 |
| 33314_at  | 0.64 | 1.11 | 0.60 | Cluster Incl. U69141:Human glutaryl-CoA dehydrogenase mRNA, complete cds /cds=(36,1352) /gb=U69141 /gi=1549326 /ug=Hs.184141 /len=1780                      |
| 41454_at  | 0.64 | 0.93 | 0.57 | Cluster Incl. W27949:39h3 Homo sapiens cDNA /gb=W27949 /gi=1307897 /ug=Hs.111029 /len=735                                                                   |
| 37188_at  | 0.64 | 0.47 | 0.55 | Cluster Incl. X92720:H.sapiens mRNA for phosphoenolpyruvate carboxykinase /cds=(66,1988) /gb=X92720 /gi=1403049 /ug=Hs.75812 /len=2147                      |
| 37985_at  | 0.64 | 1.05 | 0.73 | Cluster Incl. L37747:Homo sapiens lamin B1 gene /cds=(340,2100) /gb=L37747 /gi=576839 /ug=Hs.89497 /len=2849                                                |
| 35163_at  | 0.64 | 0.73 | 0.87 | Cluster Incl. AB028964:Homo sapiens mRNA for KIAA1041 protein, complete cds /cds=(312,2180) /gb=AB028964 /gi=5689418 /ug=Hs.26023 /len=5341                 |
| 38404_at  | 0.64 | 0.69 | 0.62 | Cluster Incl. M55153:Human transglutaminase (TGase) mRNA, complete cds /cds=(135,2198) /gb=M55153 /gi=339520 /ug=Hs.8265 /len=3257                          |
| 1747_at   | 0.64 | 0.62 | 0.62 | AD000092 /FEATURE=cds#2 /DEFINITION=CH19HHR23 Homo sapiens DNA from chromosome 19p13.2 cosmids R31240, R30272 and R28549 containing t                       |
| 33237_at  | 0.64 | 1.03 | 1.03 | Cluster Incl. AB018344:Homo sapiens mRNA for KIAA0801 protein, complete cds /cds=(144,3242) /gb=AB018344 /gi=3882322 /ug=Hs.17585 /len=3740                 |
| 32523_at  | 0.64 | 1.07 | 0.73 | Cluster Incl. M20470:Human lymphocyte clathrin light-chain B mRNA, complete cds /cds=(139,774) /gb=M20470 /gi=187056 /ug=Hs.73919 /len=1051                 |
| 34340_at  | 0.64 | 0.85 | 0.93 | Cluster Incl. AA173896:zp03b02.s1 Homo sapiens cDNA, 3 end /clone=IMAGE-595275 /clone_end=3 /gb=AA173896 /gi=1754091 /ug=Hs.31086 /len=530                  |
| 34849_at  | 0.64 | 0.68 | 0.62 | Cluster Incl. X91257:H.sapiens mRNA for seryl-tRNA synthetase /cds=(75,1619) /gb=X91257 /gi=1050526 /ug=Hs.4888 /len=1846                                   |
| 37393_at  | 0.65 | 1.04 | 0.88 | Cluster Incl. L19314:Human HRY gene, complete cds /cds=(0,842) /gb=L19314 /gi=436999 /ug=Hs.78060 /len=843                                                  |
| 33908_at  | 0.65 | 1.08 | 0.52 | Cluster Incl. X04366:Human mRNA for calcium activated neutral protease large subunit (muCANP, calpain, EC 3.4.22.17) /cds=(143,2287) /gb=X04366 /gi=29      |
| 40122_at  | 0.65 | 0.83 | 0.84 | Cluster Incl. AF037448:Homo sapiens RRM RNA binding protein Gry-rbp (GRY-RBP) mRNA, complete cds /cds=(525,2396) /gb=AF037448 /gi=3037012 /ug=H             |
| 37555_at  | 0.65 | 1.52 | 0.85 | Cluster Incl. X95263:H.sapiens mRNA for PWP2 protein /cds=(31,2790) /gb=X95263 /gi=1438061 /ug=Hs.79380 /len=3201                                           |
| 1723_g_at | 0.65 | 0.57 | 0.56 | S61953 /FEATURE= /DEFINITION=S61953 c-erbB3=receptor tyrosine kinase {alternatively spliced} [human, gastric cancer cell line MNK45, mRNA, 1042 nt]         |
| 38381_at  | 0.65 | 0.77 | 0.64 | Cluster Incl. U32315:Human syntaxin 3 mRNA, complete cds /cds=(38,907) /gb=U32315 /gi=929990 /ug=Hs.82240 /len=1903                                         |
| 35432_at  | 0.65 | 0.77 | 0.57 | Cluster Incl. AF074723:Homo sapiens RNA polymerase transcriptional regulation mediator (MED6) mRNA, complete cds /cds=(24,764) /gb=AF074723 /gi=332         |
| 37935_at  | 0.65 | 0.71 | 0.70 | Cluster Incl. AF016369:Homo sapiens U4/U6 small nuclear ribonucleoprotein hPrp4 mRNA, complete cds /cds=(60,1628) /gb=AF016369 /gi=2708304 /ug=Hs.1         |

|            |      |      |      |                                                                                                                                                         |
|------------|------|------|------|---------------------------------------------------------------------------------------------------------------------------------------------------------|
| 38621_at   | 0.65 | 1.17 | 0.71 | Cluster Incl. AJ012008:Homo sapiens genes encoding RNCC protein, DDAH protein, Ly6-C protein, Ly6-D protein and immunoglobulin receptor /cds=(276,113   |
| 32117_at   | 0.65 | 1.14 | 0.97 | Cluster Incl. U51698:HSU51698 Homo sapiens cDNA /gb=U51698 /gi=1255268 /ug=Hs.16178 /len=800                                                            |
| 39170_at   | 0.65 | 0.83 | 0.59 | Cluster Incl. AL049957:Homo sapiens mRNA; cDNA DKFpZp564J0323 (from clone DKFpZp564J0323) /cds=UNKNOWN /gb=AL049957 /gi=4884209 /ug=Hs.997              |
| 37426_at   | 0.65 | 0.98 | 0.80 | Cluster Incl. U80736:Homo sapiens CAGF9 mRNA, partial cds /cds=(0,995) /gb=U80736 /gi=2565047 /ug=Hs.110826 /len=2224                                   |
| 41388_at   | 0.65 | 0.86 | 0.67 | Cluster Incl. AF017418:Homo sapiens homeobox protein MEIS2 (MEIS2) mRNA, partial cds /cds=(0,376) /gb=AF017418 /gi=2394309 /ug=Hs.104105 /len=187       |
| 577_at     | 0.65 | 0.99 | 0.56 | M94250 /FEATURE=expanded_cds /DEFINITION=HUMMKXX Human retinoic acid inducible factor (MK) gene exons 1-5, complete cds                                 |
| 32546_at   | 0.65 | 0.95 | 0.66 | Cluster Incl. U59309:Human fumarase precursor (FH) mRNA, nuclear gene encoding mitochondrial protein, complete cds /cds=(33,1565) /gb=U59309 /gi=2317   |
| 40347_at   | 0.65 | 1.08 | 1.62 | Cluster Incl. AA913812:ol39a08.s1 Homo sapiens cDNA, 3 end /clone=IMAGE-1525814 /clone_end=3 /gb=AA913812 /gi=3053204 /ug=Hs.71331 /len=483             |
| 348_at     | 0.65 | 1.01 | 0.71 | D14678 /FEATURE= /DEFINITION=HUMMHCB Human mRNA for kinesin-related protein, partial cds                                                                |
| 39134_at   | 0.65 | 0.57 | 0.36 | Cluster Incl. AJ006973:Homo sapiens mRNA for TOM1 protein /cds=(61,1539) /gb=AJ006973 /gi=3319952 /ug=Hs.9482 /len=2310                                 |
| 34797_at   | 0.65 | 0.63 | 0.60 | Cluster Incl. AF014402:Homo sapiens type-2 phosphatidic acid phosphatase alpha-1 (PAP2-a1) mRNA, complete cds /cds=(341,1195) /gb=AF014402 /gi=312:     |
| 1530_g_at  | 0.65 | 0.56 | 0.60 | U50534 /FEATURE= /DEFINITION=HSU50534 Human BRCA2 region, mRNA sequence CG003                                                                           |
| 31792_at   | 0.65 | 0.32 | 0.46 | Cluster Incl. M20560:Human lipocortin-III mRNA, complete cds /cds=(46,1017) /gb=M20560 /gi=186967 /ug=Hs.1378 /len=1339                                 |
| 1753_s_at  | 0.65 | 0.92 | 0.63 | AD000092 /FEATURE=cds#7 /DEFINITION=CH19HHR23 Homo sapiens DNA from chromosome 19p13.2 cosmids R31240, R30272 and R28549 containing t                   |
| 676_g_at   | 0.65 | 1.23 | 0.67 | J04164 /FEATURE= /DEFINITION=HUM927A Human interferon-inducible protein 9-27 mRNA, complete cds                                                         |
| 40575_at   | 0.65 | 0.74 | 0.71 | Cluster Incl. AB011155:Homo sapiens mRNA for KIAA0583 protein, partial cds /cds=(0,3845) /gb=AB011155 /gi=3043689 /ug=Hs.170290 /len=5493               |
| 40564_at   | 0.65 | 0.96 | 0.94 | Cluster Incl. N42007:yw69e06.r1 Homo sapiens cDNA, 5 end /clone=IMAGE-257506 /clone_end=5 /gb=N42007 /gi=1166038 /ug=Hs.169329 /len=553                 |
| 41179_at   | 0.65 | 0.91 | 0.99 | Cluster Incl. AB029023:Homo sapiens mRNA for KIAA1100 protein, complete cds /cds=(410,1708) /gb=AB029023 /gi=5689536 /ug=Hs.179946 /len=4023            |
| 36535_at   | 0.65 | 1.02 | 1.07 | Cluster Incl. U04209:Human associated microfibrillar protein mRNA, complete cds /cds=(118,1437) /gb=U04209 /gi=434655 /ug=Hs.61418 /len=1955            |
| 1782_s_at  | 0.66 | 1.16 | 0.78 | M31303 /FEATURE=mRNA /DEFINITION=HUMOP18A Human oncoprotein 18 (Op18) gene, complete cds                                                                |
| 33212_at   | 0.66 | 0.87 | 0.52 | Cluster Incl. AF006751:Homo sapiens ES/130 mRNA, complete cds /cds=(70,3003) /gb=AF006751 /gi=3299884 /ug=Hs.98614 /len=3086                            |
| 32590_at   | 0.66 | 0.99 | 0.99 | Cluster Incl. M60858:Human nucleolin gene, complete cds /cds=(111,2234) /gb=M60858 /gi=189305 /ug=Hs.79110 /len=2518                                    |
| 34882_at   | 0.66 | 1.37 | 0.82 | Cluster Incl. Y12065:Homo sapiens mRNA for nucleolar protein hNop56 /cds=(21,1829) /gb=Y12065 /gi=2230877 /ug=Hs.5092 /len=1973                         |
| 36179_at   | 0.66 | 0.70 | 0.87 | Cluster Incl. U12779:Human MAP kinase activated protein kinase 2 mRNA, complete cds /cds=(378,1490) /gb=U12779 /gi=530089 /ug=Hs.75074 /len=2258        |
| 32819_at   | 0.66 | 0.63 | 0.54 | Cluster Incl. AJ223352:Homo sapiens mRNA for for histone H2B, clone pjG4-5-14 /cds=(16,396) /gb=AJ223352 /gi=3255996 /ug=Hs.20418 /len=793              |
| 38121_at   | 0.66 | 0.81 | 0.85 | Cluster Incl. X59892:H.sapiens mRNA for IFN-inducible gamma2 protein /cds=(111,1526) /gb=X59892 /gi=30820 /ug=Hs.82030 /len=2608                        |
| 34798_at   | 0.66 | 1.18 | 0.82 | Cluster Incl. Z35491:H.sapiens mRNA for novel glucocorticoid receptor-associated protein /cds=(278,1102) /gb=Z35491 /gi=1143475 /ug=Hs.41714 /len=1296  |
| 35385_at   | 0.66 | 0.93 | 0.88 | Cluster Incl. A1766078:wh67g08.x1 Homo sapiens cDNA, 3 end /clone=IMAGE-2385854 /clone_end=3 /gb=A1766078 /gi=5232587 /ug=Hs.157113 /len=682            |
| 39416_at   | 0.66 | 0.73 | 0.64 | Cluster Incl. U90913:Human clone 23665 mRNA sequence /cds=UNKNOWN /gb=U90913 /gi=1913893 /ug=Hs.12956 /len=1260                                         |
| 39075_at   | 0.66 | 0.73 | 0.48 | Cluster Incl. AF040958:Homo sapiens lysosomal neuraminidase precursor, mRNA, complete cds /cds=(129,1376) /gb=AF040958 /gi=2773338 /ug=Hs.118721        |
| 39437_at   | 0.66 | 1.04 | 0.80 | Cluster Incl. Z78324:HSZ78324 Homo sapiens cDNA /clone=2.45-(CEPH) /gb=Z78324 /gi=1495097 /ug=Hs.132969 /len=815                                        |
| 40140_at   | 0.66 | 0.51 | 0.62 | Cluster Incl. D76444:Homo sapiens hkf-1 mRNA, complete cds /cds=(922,2979) /gb=D76444 /gi=1945614 /ug=Hs.155968 /len=3423                               |
| 32434_at   | 0.66 | 0.82 | 0.63 | Cluster Incl. D10522:Homo sapiens mRNA for 80K-L protein, complete cds /cds=(369,1367) /gb=D10522 /gi=219893 /ug=Hs.75607 /len=2589                     |
| 41267_at   | 0.66 | 0.94 | 0.62 | Cluster Incl. AB028972:Homo sapiens mRNA for KIAA1049 protein, partial cds /cds=(0,1653) /gb=AB028972 /gi=5689434 /ug=Hs.227835 /len=1794               |
| 40801_at   | 0.66 | 0.97 | 0.71 | Cluster Incl. AA643063:nr95e11.s1 Homo sapiens cDNA, 3 end /clone=IMAGE-1175756 /clone_end=3 /gb=AA643063 /gi=2568281 /ug=Hs.172069 /len=575            |
| 37912_at   | 0.66 | 1.06 | 0.70 | Cluster Incl. X80200:H.sapiens MLN62 mRNA /cds=(85,1497) /gb=X80200 /gi=951276 /ug=Hs.8375 /len=1999                                                    |
| 37012_at   | 0.66 | 0.94 | 0.81 | Cluster Incl. U03271:Human F-actin capping protein beta subunit mRNA, complete cds /cds=(0,818) /gb=U03271 /gi=595256 /ug=Hs.76368 /len=1077            |
| 34765_at   | 0.66 | 0.97 | 1.21 | Cluster Incl. D13645:Human mRNA for KIAA0020 gene, complete cds /cds=(418,1944) /gb=D13645 /gi=286008 /ug=Hs.2471 /len=2112                             |
| 33385_g_at | 0.66 | 0.84 | 0.56 | Cluster Incl. U31346:Human calpastatin mRNA, partial cds, long 3UTR /cds=(0,611) /gb=U31346 /gi=951316 /ug=Hs.226067 /len=1323                          |
| 35615_at   | 0.66 | 1.22 | 1.04 | Cluster Incl. D50914:Human mRNA for KIAA0124 gene, partial cds /cds=(0,2048) /gb=D50914 /gi=1469170 /ug=Hs.30736 /len=2108                              |
| 38726_at   | 0.66 | 1.02 | 0.55 | Cluster Incl. W80399:zh49e04.s1 Homo sapiens cDNA, 3 end /clone=IMAGE-415242 /clone_end=3 /gb=W80399 /gi=1391416 /ug=Hs.108973 /len=578                 |
| 33351_at   | 0.66 | 0.97 | 0.77 | Cluster Incl. AF064607:Homo sapiens GC20 protein mRNA, complete cds /cds=(70,411) /gb=AF064607 /gi=3152667 /ug=Hs.21756 /len=812                        |
| 36203_at   | 0.66 | 1.10 | 1.07 | Cluster Incl. X16277:Human gene for ornithine decarboxylase ODC (EC 4.1.1.17) /cds=(334,1719) /gb=X16277 /gi=35137 /ug=Hs.75212 /len=2062               |
| 41268_g_at | 0.66 | 0.96 | 0.76 | Cluster Incl. AB028972:Homo sapiens mRNA for KIAA1049 protein, partial cds /cds=(0,1653) /gb=AB028972 /gi=5689434 /ug=Hs.227835 /len=1794               |
| 32830_g_at | 0.66 | 1.06 | 0.93 | Cluster Incl. X97544:H.sapiens mRNA for TIM17 preprotein translocase /cds=(13,528) /gb=X97544 /gi=1770563 /ug=Hs.20716 /len=910                         |
| 35800_at   | 0.66 | 1.57 | 0.65 | Cluster Incl. D63391:Human mRNA for platelet activating factor acetylhydrolase IB gamma-subunit, complete cds /cds=(113,808) /gb=D63391 /gi=1122218 /ug |
| 32697_at   | 0.66 | 0.98 | 0.88 | Cluster Incl. AF042729:Homo sapiens lithium-sensitive myo-inositol monophosphatase A1 (IMPA1) mRNA, complete cds /cds=(68,901) /gb=AF042729 /gi=280     |

|            |      |      |      |                                                                                                                                                        |
|------------|------|------|------|--------------------------------------------------------------------------------------------------------------------------------------------------------|
| 41197_at   | 0.66 | 0.87 | 0.73 | Cluster Incl. D21235:Human mRNA for HHR23A protein, complete cds /cds=(36,1127) /gb=D21235 /gi=498145 /ug=Hs.180455 /len=1719                          |
| 744_at     | 0.66 | 0.95 | 0.75 | D50487 /FEATURE= /DEFINITION=HUMHRH1 Human mRNA for RNA helicase (HRH1), complete cds                                                                  |
| 36594_s_at | 0.66 | 0.95 | 0.63 | Cluster Incl. U72263:Human multiple exostoses type II protein EXT2.I mRNA, complete cds /cds=(166,2352) /gb=U72263 /gi=2251237 /ug=Hs.75334 /len=300   |
| 38617_at   | 0.66 | 1.00 | 0.70 | Cluster Incl. D45906:Homo sapiens mRNA for LIMK-2, complete cds /cds=(114,2030) /gb=D45906 /gi=1805593 /ug=Hs.100623 /len=3668                         |
| 35006_at   | 0.66 | 0.74 | 1.21 | Cluster Incl. L39060:Homo sapiens transcription factor SL1 mRNA, complete cds /cds=(24,1376) /gb=L39060 /gi=632996 /ug=Hs.153088 /len=1578             |
| 35302_at   | 0.66 | 1.13 | 0.91 | Cluster Incl. AJ132712:Homo sapiens mRNA for tip associating protein (TAP) /cds=(0,1859) /gb=AJ132712 /gi=4220553 /ug=Hs.5615 /len=1860                |
| 32318_s_at | 0.66 | 0.91 | 0.71 | Cluster Incl. X63432:H.sapiens ACTB mRNA for mutant beta-actin (beta-actin) /cds=(73,1200) /gb=X63432 /gi=28335 /ug=Hs.180952 /len=1792                |
| 36592_at   | 0.66 | 1.40 | 0.89 | Cluster Incl. S85655:prohibitin [human, mRNA, 1043 nt] /cds=(50,868) /gb=S85655 /gi=246482 /ug=Hs.75323 /len=1024                                      |
| 36650_at   | 1.50 | 1.47 | 1.94 | Cluster Incl. D13639:Human mRNA for KIAK0002 gene, complete cds /cds=(269,1138) /gb=D13639 /gi=285990 /ug=Hs.75586 /len=6478                           |
| 39215_at   | 1.50 | 0.31 | 0.42 | Cluster Incl. AL021155:dJ934G17.3 (Brain Natriuretic Protein BNP) /cds=(232,636) /gb=AL021155 /gi=3171888 /ug=Hs.219140 /len=825                       |
| 36139_at   | 1.50 | 1.37 | 1.51 | Cluster Incl. AL050289:Homo sapiens mRNA; cDNA DKFZp586G0522 (from clone DKFZp586G0522) /cds=(179,1876) /gb=AL050289 /gi=4886510 /ug=Hs.744            |
| 41466_s_at | 1.50 | 0.63 | 0.67 | Cluster Incl. L04282:Human CACCC box-binding protein mRNA, complete cds /cds=(390,1754) /gb=L04282 /gi=388318 /ug=Hs.112180 /len=2378                  |
| 37345_at   | 1.50 | 1.03 | 1.49 | Cluster Incl. AF013759:Homo sapiens calumein (Calu) mRNA, complete cds /cds=(58,1005) /gb=AF013759 /gi=3153208 /ug=Hs.7753 /len=3316                   |
| 32237_at   | 1.50 | 1.11 | 1.27 | Cluster Incl. D87454:Human mRNA for KIAA0265 gene, partial cds /cds=(0,1205) /gb=D87454 /gi=1665796 /ug=Hs.192966 /len=5551                            |
| 41058_g_at | 1.50 | 1.26 | 1.27 | Cluster Incl. AI760162:wg58e09.x1 Homo sapiens cDNA, 3 end /clone=IMAGE-2369320 /clone_end=3 /gb=AI760162 /gi=5175829 /ug=Hs.9676 /len=527             |
| 35737_at   | 1.50 | 1.09 | 1.68 | Cluster Incl. U90549:Human non-histone chromosomal protein (NHC) mRNA, complete cds /cds=(691,963) /gb=U90549 /gi=2062699 /ug=Hs.63272 /len=1981       |
| 39951_at   | 1.51 | 1.58 | 2.01 | Cluster Incl. L20826:Human I-plastin mRNA, complete cds /cds=(97,1986) /gb=L20826 /gi=405229 /ug=Hs.430 /len=3639                                      |
| 39003_at   | 1.51 | 0.97 | 1.09 | Cluster Incl. Z50022:H.sapiens mRNA for surface glycoprotein /cds=(93,635) /gb=Z50022 /gi=1107702 /ug=Hs.111126 /len=2617                              |
| 33921_at   | 1.51 | 0.95 | 0.95 | Cluster Incl. Y15409:Homo sapiens mRNA for putative glucose 6-phosphate translocase /cds=(169,1458) /gb=Y15409 /gi=2765460 /ug=Hs.26655 /len=2013      |
| 34648_at   | 1.51 | 1.14 | 1.51 | Cluster Incl. Z12830:H.sapiens mRNA for SSR alpha subunit /cds=(29,889) /gb=Z12830 /gi=551637 /ug=Hs.76152 /len=974                                    |
| 32583_at   | 1.51 | 0.89 | 1.34 | Cluster Incl. J04111:Human c-jun proto oncogene (JUN), complete cds, clone hCJ-1 /cds=(974,1969) /gb=J04111 /gi=186624 /ug=Hs.78465 /len=3336          |
| 40684_at   | 1.51 | 1.44 | 0.97 | Cluster Incl. U78190:Human GTP cyclohydrolase I feedback regulatory protein gene, complete cds /cds=(94,348) /gb=U78190 /gi=1698996 /ug=Hs.83081 /len= |
| 292_s_at   | 1.51 | 1.06 | 1.16 | Protein Kinase                                                                                                                                         |
| 873_at     | 1.52 | 2.37 | 1.66 | M26679 /FEATURE=expanded_cds /DEFINITION=HUMHOX13G Homo sapiens homeobox protein (HOX-1.3) gene, complete cds                                          |
| 31526_f_at | 1.52 | 1.00 | 1.27 | Cluster Incl. X63547:H.sapiens mRNA for tre oncogene (clone 213) /cds=UNKNOWN /gb=X63547 /gi=37332 /ug=Hs.182377 /len=8179                             |
| 31877_at   | 1.52 | 1.40 | 1.66 | Cluster Incl. AF053977:Homo sapiens cell division cycle protein 23 (CDC23) mRNA, complete cds /cds=(16,1791) /gb=AF053977 /gi=3283050 /ug=Hs.153546    |
| 36588_at   | 1.52 | 1.03 | 1.35 | Cluster Incl. AB018353:Homo sapiens mRNA for KIAA0810 protein, partial cds /cds=(0,2475) /gb=AB018353 /gi=3882340 /ug=Hs.7531 /len=4047                |
| 31496_g_at | 1.52 | 2.28 | 1.06 | Cluster Incl. D63789:Homo sapiens DNA for SCM-1beta precursor, complete cds /cds=(21,365) /gb=D63789 /gi=1754608 /ug=Hs.174228 /len=485                |
| 37676_at   | 1.53 | 1.10 | 1.46 | Cluster Incl. AF056490:Homo sapiens cAMP-specific phosphodiesterase 8A (PDE8A) mRNA, partial cds /cds=(0,2141) /gb=AF056490 /gi=3184388 /ug=Hs.78      |
| 39248_at   | 1.53 | 6.19 | 5.46 | Cluster Incl. N74607:za55a01.s1 Homo sapiens cDNA, 3 end /clone=IMAGE-296424 /clone_end=3 /gb=N74607 /gi=1231892 /ug=Hs.234642 /len=487                |
| 39809_at   | 1.53 | 0.88 | 0.81 | Cluster Incl. AF019214:Homo sapiens HMG box containing protein 1 mRNA, complete cds /cds=(15,1559) /gb=AF019214 /gi=2460168 /ug=Hs.10882 /len=264      |
| 36795_at   | 1.53 | 1.03 | 1.24 | Cluster Incl. J03077:Human co-beta glucosidase (proactivator) mRNA, complete cds /cds=(38,1612) /gb=J03077 /gi=183230 /ug=Hs.78575 /len=2767           |
| 36162_at   | 1.53 | 1.15 | 1.02 | Cluster Incl. X64364:H.sapiens mRNA for M6 antigen /cds=(57,866) /gb=X64364 /gi=34448 /ug=Hs.74631 /len=1615                                           |
| 35669_at   | 1.53 | 1.88 | 1.42 | Cluster Incl. AB014533:Homo sapiens mRNA for KIAA0633 protein, partial cds /cds=(0,3951) /gb=AB014533 /gi=3327079 /ug=Hs.33010 /len=5289               |
| 38013_at   | 1.53 | 0.60 | 0.89 | Cluster Incl. AL096842:Homo sapiens mRNA; cDNA DKFZp586D1519 (from clone DKFZp586D1519) /cds=(0,1517) /gb=AL096842 /gi=5524930 /ug=Hs.7946             |
| 35851_g_at | 1.53 | 1.35 | 0.98 | Cluster Incl. AI950382:wp10g06.x1 Homo sapiens cDNA, 3 end /clone=IMAGE-2464474 /clone_end=3 /gb=AI950382 /gi=5742692 /ug=Hs.72660 /len=727            |
| 39018_at   | 1.53 | 1.08 | 1.03 | Cluster Incl. AF026977:Homo sapiens microsomal glutathione S-transferase 3 (MGST3) mRNA, complete cds /cds=(49,507) /gb=AF026977 /gi=2583080 /ug=      |
| 33943_at   | 1.54 | 0.84 | 1.69 | Cluster Incl. L20941:Human ferritin heavy chain mRNA, complete cds /cds=(208,759) /gb=L20941 /gi=507251 /ug=Hs.62954 /len=1198                         |
| 41565_at   | 1.54 | 0.94 | 0.98 | Cluster Incl. AF034373:Homo sapiens ataxin-2-like protein A2LP (A2LG) mRNA, complete cds /cds=(62,3217) /gb=AF034373 /gi=3820483 /ug=Hs.43509 /len=    |
| 32944_at   | 1.54 | 2.09 | 1.73 | Cluster Incl. AF040990:Homo sapiens roundabout 1 (robo1) mRNA, complete cds /cds=(0,4955) /gb=AF040990 /gi=2804783 /ug=Hs.230104 /len=4956             |
| 33988_at   | 1.54 | 0.99 | 1.17 | Cluster Incl. X75861:H.sapiens TEGT gene /cds=(40,753) /gb=X75861 /gi=456258 /ug=Hs.74637 /len=2566                                                    |
| 39380_at   | 1.54 | 1.15 | 1.88 | Cluster Incl. AB014597:Homo sapiens mRNA for KIAA0697 protein, partial cds /cds=(0,2906) /gb=AB014597 /gi=3327207 /ug=Hs.12329 /len=3900               |
| 40186_at   | 1.54 | 1.02 | 0.86 | Cluster Incl. Y08302:H.sapiens mRNA for MAP kinase phosphatase 4 /cds=(113,1267) /gb=Y08302 /gi=1871538 /ug=Hs.144879 /len=2284                        |
| 31497_at   | 1.55 | 0.80 | 3.91 | Cluster Incl. U19142:Human GAGE-1 protein mRNA, complete cds /cds=(48,464) /gb=U19142 /gi=914898 /ug=Hs.176660 /len=634                                |
| 36467_g_at | 1.55 | 1.44 | 1.52 | Cluster Incl. U26742:Human dystrobrevin-delta mRNA, complete cds /cds=(324,1448) /gb=U26742 /gi=1255988 /ug=Hs.54435 /len=1707                         |
| 32893_s_at | 1.55 | 1.00 | 1.03 | Cluster Incl. M30474:Human kidney gamma-glutamyl transpeptidase type II mRNA, 3 end /cds=(0,596) /gb=M30474 /gi=183139 /ug=Hs.211824 /len=762          |
| 41215_s_at | 1.55 | 0.91 | 0.95 | Cluster Incl. D13891:Human mRNA for Id-2H, complete cds /cds=(96,500) /gb=D13891 /gi=464183 /ug=Hs.180919 /len=1049                                    |



|            |      |      |      |                                                                                                                                                       |
|------------|------|------|------|-------------------------------------------------------------------------------------------------------------------------------------------------------|
| 39080_at   | 1.55 | 1.18 | 1.27 | Cluster Incl. M88458:Human ELP-1 mRNA sequence /cds=UNKNOWN /gb=M88458 /gi=182077 /ug=Hs.118778 /len=1180                                             |
| 1913_at    | 1.55 | 0.70 | 0.71 | U47414 /FEATURE= /DEFINITION=HSU47414 Human cyclin G2 mRNA, complete cds                                                                              |
| 32028_at   | 1.55 | 1.57 | 1.31 | Cluster Incl. U85773:Human phosphomannomutase (PMM2) mRNA, complete cds /cds=(48,788) /gb=U85773 /gi=2218086 /ug=Hs.154695 /len=2285                  |
| 31838_at   | 1.55 | 1.48 | 1.96 | Cluster Incl. U79274:Human clone 23733 mRNA, complete cds /cds=(416,1237) /gb=U79274 /gi=1710240 /ug=Hs.150555 /len=1484                              |
| 32027_at   | 1.55 | 1.09 | 1.28 | Cluster Incl. AF012281:Homo sapiens PDZ domain containing-protein (PDZK1) mRNA, complete cds /cds=(33,1592) /gb=AF012281 /gi=2944188 /ug=Hs.1545      |
| 953_g_at   | 1.56 | 0.91 | 1.08 | Fk506-Binding Protein, Alt. Splice 2                                                                                                                  |
| 33799_at   | 1.56 | 1.11 | 1.72 | Cluster Incl. U76248:Human hSIAH2 mRNA, complete cds /cds=(526,1500) /gb=U76248 /gi=2673967 /ug=Hs.20191 /len=2240                                    |
| 38253_at   | 1.56 | 1.31 | 1.54 | Cluster Incl. U84011:Human glycogen debranching enzyme isoform 6 (AGL) mRNA, alternatively spliced isoform, complete cds /cds=(259,4809) /gb=U84011 / |
| 35346_at   | 1.56 | 1.23 | 1.38 | Cluster Incl. AB007856:Homo sapiens KIAA0396 mRNA, partial cds /cds=(0,1805) /gb=AB007856 /gi=2662072 /ug=Hs.6048 /len=6419                           |
| 33102_at   | 1.56 | 0.95 | 1.00 | Cluster Incl. D67031:Homo sapiens ADDL mRNA for adducin-like protein, complete cds /cds=(183,2207) /gb=D67031 /gi=2696053 /ug=Hs.8110 /len=2920       |
| 37902_at   | 1.56 | 1.24 | 1.73 | Cluster Incl. L13278:Homo sapiens zeta-crystallin/quinone reductase mRNA, complete cds /cds=(10,999) /gb=L13278 /gi=292414 /ug=Hs.83114 /len=1796     |
| 37973_at   | 1.56 | 1.00 | 1.43 | Cluster Incl. AB018256:Homo sapiens mRNA for KIAA0713 protein, partial cds /cds=(0,2839) /gb=AB018256 /gi=3882146 /ug=Hs.88756 /len=6817              |
| 31637_s_at | 1.56 | 1.00 | 1.84 | Cluster Incl. X72631:H.sapiens mRNA encoding Rev-ErbAalpha /cds=UNKNOWN /gb=X72631 /gi=732801 /ug=Hs.211606 /len=2335                                 |
| 40278_at   | 1.57 | 1.12 | 1.72 | Cluster Incl. AB029003:Homo sapiens mRNA for KIAA1080 protein, partial cds /cds=(0,1554) /gb=AB029003 /gi=5689496 /ug=Hs.155546 /len=4791             |
| 40735_at   | 1.57 | 0.97 | 1.06 | Cluster Incl. D16626:Human mRNA for histidase, complete cds /cds=(243,2216) /gb=D16626 /gi=451209 /ug=Hs.89429 /len=3085                              |
| 38971_r_at | 1.57 | 1.01 | 1.31 | Cluster Incl. AJ011896:Homo sapiens mRNA for HIV-1, Nef-associated factor 1 beta (Naf1 beta) /cds=(110,2017) /gb=AJ011896 /gi=3758820 /ug=Hs.109281 / |
| 35154_at   | 1.57 | 1.14 | 0.92 | Cluster Incl. W68046:zd42a12.s1 Homo sapiens cDNA, 3 end /clone=IMAGE-343294 /clone_end=3 /gb=W68046 /gi=1376935 /ug=Hs.25817 /len=575                |
| 38607_at   | 1.57 | 2.29 | 1.92 | Cluster Incl. AF027204:Homo sapiens putative tetraspan transmembrane protein L6H (TM4SF5) mRNA, complete cds /cds=(32,625) /gb=AF027204 /gi=25870     |
| 37320_at   | 1.57 | 1.45 | 1.70 | Cluster Incl. D14694:Human mRNA for KIAA0024 gene, complete cds /cds=(102,1523) /gb=D14694 /gi=603801 /ug=Hs.77329 /len=2504                          |
| 37225_at   | 1.57 | 0.87 | 1.30 | Cluster Incl. D79994:Human mRNA for KIAA0172 gene, partial cds /cds=(0,3923) /gb=D79994 /gi=1136403 /ug=Hs.77546 /len=4792                            |
| 33603_at   | 1.57 | 1.00 | 0.95 | Cluster Incl. U52111:adrenoleukodystrophy protein /cds=(386,2623) /gb=U52111 /gi=1302649 /ug=Hs.159546 /len=2750                                      |
| 31623_f_at | 1.57 | 0.93 | 1.35 | Cluster Incl. K01383:Human metallothionein-I-A gene, complete coding sequence /cds=(0,185) /gb=K01383 /gi=187536 /ug=Hs.203967 /len=186               |
| 39099_at   | 1.58 | 1.06 | 1.45 | Cluster Incl. X97064:H.sapiens mRNA for Sec23A isoform, 2748bp /cds=(159,2456) /gb=X97064 /gi=1296663 /ug=Hs.92962 /len=2748                          |
| 784_g_at   | 1.58 | 1.09 | 1.10 | U96113 /FEATURE= /DEFINITION=HSU96113 Homo sapiens Nedd4-like ubiquitin-protein ligase WWP1 mRNA, partial cds                                         |
| 33380_at   | 1.58 | 1.22 | 1.42 | Cluster Incl. AB005754:Homo sapiens mRNA for LAK-1, complete cds /cds=(126,1754) /gb=AB005754 /gi=5139668 /ug=Hs.225951 /len=3853                     |
| 41274_at   | 1.58 | 0.99 | 0.99 | Cluster Incl. AA908993:ol10d03.s1 Homo sapiens cDNA, 3 end /clone=IMAGE-1523045 /clone_end=3 /gb=AA908993 /gi=3048398 /ug=Hs.23294 /len=491           |
| 1890_at    | 1.58 | 1.64 | 1.95 | AB000584 /FEATURE= /DEFINITION=AB000584 Homo sapiens mRNA for TGF-beta superfamily protein, complete cds                                              |
| 38110_at   | 1.58 | 0.85 | 1.18 | Cluster Incl. AF000652:Homo sapiens syntenin (sycl) mRNA, complete cds /cds=(148,1044) /gb=AF000652 /gi=2795862 /ug=Hs.8180 /len=2162                 |
| 1189_at    | 1.59 | 1.07 | 1.15 | X85753 /FEATURE= /DEFINITION=HSCDK8 Homo sapiens mRNA for CDK8 protein kinase                                                                         |
| 40898_at   | 1.59 | 0.89 | 1.40 | Cluster Incl. U46751:Human phosphotyrosine independent ligand p62 for the Lck SH2 domain mRNA, complete cds /cds=(52,1374) /gb=U46751 /gi=3077821 /   |
| 38417_at   | 1.59 | 1.37 | 1.21 | Cluster Incl. M91029:Human AMP deaminase (AMPD2) mRNA /cds=(0,2282) /gb=M91029 /gi=644508 /ug=Hs.82927 /len=3178                                      |
| 41790_at   | 1.59 | 1.05 | 1.59 | Cluster Incl. AL031230:dJ73M23.2 (NAD+-dependent succinic semialdehyde dehydrogenase (SSADH, EC 1.2.1.24)) /cds=(0,1607) /gb=AL031230 /gi=394784      |
| 36620_at   | 1.59 | 1.22 | 1.66 | Cluster Incl. X02317:Human mRNA for Cu/Zn superoxide dismutase (SOD) /cds=(64,528) /gb=X02317 /gi=36541 /ug=Hs.75428 /len=874                         |
| 31825_at   | 1.60 | 1.06 | 0.95 | Cluster Incl. M58600:Human heparin cofactor II (HCF2) gene, exons 1 through 5 /cds=(63,1562) /gb=M58600 /gi=183907 /ug=Hs.1478 /len=2217              |
| 37324_at   | 1.60 | 1.12 | 1.48 | Cluster Incl. X01060:Human mRNA for transferrin receptor /cds=(263,2545) /gb=X01060 /gi=37432 /ug=Hs.77356 /len=5010                                  |
| 35320_at   | 1.60 | 1.07 | 1.49 | Cluster Incl. AB004857:Homo sapiens mRNA for NRAMP2, complete cds /cds=(88,1773) /gb=AB004857 /gi=2911111 /ug=Hs.57435 /len=4103                      |
| 34327_at   | 1.60 | 0.98 | 1.35 | Cluster Incl. Z46606:H.sapiens HLTF gene for helicase-like transcription factor /cds=UNKNOWN /gb=Z46606 /gi=575250 /ug=Hs.3068 /len=5439              |
| 37615_at   | 1.60 | 0.71 | 1.11 | Cluster Incl. D86962:Human mRNA for KIAA0207 gene, complete cds /cds=(781,2547) /gb=D86962 /gi=1503997 /ug=Hs.81875 /len=5431                         |
| 36548_at   | 1.60 | 1.14 | 1.50 | Cluster Incl. AB020702:Homo sapiens mRNA for KIAA0895 protein, partial cds /cds=(0,1624) /gb=AB020702 /gi=4240278 /ug=Hs.6224 /len=4155               |
| 33183_at   | 1.60 | 1.45 | 1.21 | Cluster Incl. L76927:Human galactokinase (GALK1) gene, complete cds /cds=(63,1241) /gb=L76927 /gi=1929894 /ug=Hs.92357 /len=1361                      |
| 40051_at   | 1.61 | 0.93 | 1.12 | Cluster Incl. D31762:Human mRNA for KIAA0057 gene, complete cds /cds=(75,1187) /gb=D31762 /gi=498149 /ug=Hs.153954 /len=6974                          |
| 2062_at    | 1.61 | 0.84 | 1.27 | L19182 /FEATURE= /DEFINITION=HUMMAC25X Human MAC25 mRNA, complete cds                                                                                 |
| 32203_at   | 1.61 | 1.04 | 1.07 | Cluster Incl. AA160708:zo72c02.r1 Homo sapiens cDNA, 5 end /clone=IMAGE-592418 /clone_end=5 /gb=AA160708 /gi=1736075 /ug=Hs.18563 /len=643            |
| 36722_s_at | 1.61 | 1.03 | 1.06 | Cluster Incl. X87871:H.sapiens mRNA for hepatocyte nuclear factor 4b /cds=(84,1481) /gb=X87871 /gi=1595755 /ug=Hs.54424 /len=1635                     |
| 39947_at   | 1.61 | 1.43 | 1.16 | Cluster Incl. AJ006352:Homo sapiens mRNA for ephrin-A4 protein, membrane bound form /cds=(27,632) /gb=AJ006352 /gi=3821234 /ug=Hs.42331 /len=1181     |
| 33976_at   | 1.61 | 0.82 | 1.13 | Cluster Incl. AF035581:untitled /cds=(128,1525) /gb=AF035581 /gi=4104418 /ug=Hs.73168 /len=2628                                                       |
| 34687_at   | 1.61 | 1.91 | 2.12 | Cluster Incl. AF052167:Homo sapiens clone 24749 and 24750 mRNA sequences /cds=UNKNOWN /gb=AF052167 /gi=3360478 /ug=Hs.235685 /len=1496                |

|            |      |       |      |                                                                                                                                                        |
|------------|------|-------|------|--------------------------------------------------------------------------------------------------------------------------------------------------------|
| 1362_s_at  | 1.61 | 0.96  | 0.96 | M84820 /FEATURE= /DEFINITION=HUMRXRB Human retinoid X receptor beta (RXR-beta) mRNA, complete cds                                                      |
| 2033_s_at  | 1.61 | 0.72  | 1.12 | U10564 /FEATURE= /DEFINITION=HSU10564 Human CDK tyrosine 15-kinase WEE1Hu (Wee1Hu) mRNA, complete cds                                                  |
| 36537_at   | 1.61 | 0.91  | 1.41 | Cluster Incl. AB011093:Homo sapiens mRNA for KIAA0521 protein, partial cds /cds=(0,3154) /gb=AB011093 /gi=3043565 /ug=Hs.6150 /len=5113                |
| 34174_s_at | 1.62 | 1.29  | 1.50 | Cluster Incl. AJ131581:Homo sapiens mRNA for latrophilin-2 /cds=(180,4391) /gb=AJ131581 /gi=4034485 /ug=Hs.234792 /len=4669                            |
| 40359_at   | 1.63 | 1.02  | 1.13 | Cluster Incl. M91083:Human DNA-binding protein (HRC1) mRNA, complete cds /cds=UNKNOWN /gb=M91083 /gi=184389 /ug=Hs.72925 /len=1539                     |
| 36980_at   | 1.63 | 0.96  | 1.52 | Cluster Incl. U03105:Human B4-2 protein mRNA, complete cds /cds=(113,1096) /gb=U03105 /gi=476094 /ug=Hs.75969 /len=2061                                |
| 37650_at   | 1.63 | 1.04  | 1.17 | Cluster Incl. U41315:Human ring zinc-finger protein (ZNF127-Xp) gene and 5 flanking sequence /cds=(342,1799) /gb=U41315 /gi=1304598 /ug=Hs.7838 /len=3 |
| 1825_at    | 1.64 | 0.97  | 1.31 | L33075 /FEATURE= /DEFINITION=HUMIQGA Homo sapiens ras GTPase-activating-like protein (IQGAP1) mRNA, complete cds                                       |
| 786_at     | 1.64 | 1.20  | 1.57 | X06745 /FEATURE= /DEFINITION=HSPOLAR Human mRNA for DNA polymerase alpha-subunit                                                                       |
| 38086_at   | 1.64 | 0.90  | 1.33 | Cluster Incl. AB007935:Homo sapiens mRNA for KIAA0466 protein, partial cds /cds=(0,2104) /gb=AB007935 /gi=3413893 /ug=Hs.81234 /len=4974               |
| 1130_at    | 1.64 | 1.16  | 1.68 | L11284 /FEATURE= /DEFINITION=HUMMEK1NF Homosapiens ERK activator kinase (MEK1) mRNA                                                                    |
| 37274_at   | 1.64 | 0.98  | 1.09 | Cluster Incl. AF018631:untitled /cds=(35,1666) /gb=AF018631 /gi=2674074 /ug=Hs.78885 /len=1996                                                         |
| 39734_at   | 1.64 | 1.05  | 2.18 | Cluster Incl. U10117:Human endothelial-monocyte activating polypeptide II mRNA, complete cds /cds=(49,987) /gb=U10117 /gi=498909 /ug=Hs.146401 /len=1  |
| 39963_at   | 1.65 | 1.14  | 1.58 | Cluster Incl. AL022393:Homo sapiens DNA sequence from P1 p373c6 on chromosome 6p21.31-21.33. Contains zinc finger proteins, pseudogenes, ESTs and      |
| 33243_at   | 1.65 | 0.94  | 1.68 | Cluster Incl. AF099935:Homo sapiens MDC-3.13 isoform 2 mRNA, complete cds /cds=(84,680) /gb=AF099935 /gi=3860092 /ug=Hs.17839 /len=1897                |
| 33811_at   | 1.66 | 0.64  | 1.33 | Cluster Incl. A1761567:wg66a05.x1 Homo sapiens cDNA, 3 end /clone=IMAGE-2370032 /clone_end=3 /gb=A1761567 /gi=5177234 /ug=Hs.203955 /len=564           |
| 36231_at   | 1.66 | 1.07  | 1.13 | Cluster Incl. AC002073:Human PAC clone DJ515N1 from 22q11.2-q22 /cds=(0,791) /gb=AC002073 /gi=2078469 /ug=Hs.239385 /len=792                           |
| 37215_at   | 1.66 | 1.10  | 1.32 | Cluster Incl. AF046798:untitled /cds=(113,2656) /gb=AF046798 /gi=3170406 /ug=Hs.771 /len=2828                                                          |
| 38081_at   | 1.66 | 0.97  | 1.08 | Cluster Incl. J03459:Human leukotriene A-4 hydrolase mRNA, complete cds /cds=(68,1903) /gb=J03459 /gi=187172 /ug=Hs.81118 /len=2060                    |
| 40155_at   | 1.67 | 1.36  | 2.15 | Cluster Incl. D31883:Human mRNA for KIAA0059 gene, complete cds /cds=(221,1609) /gb=D31883 /gi=505093 /ug=Hs.158203 /len=6754                          |
| 257_at     | 1.67 | 0.84  | 1.61 | M14648 /FEATURE= /DEFINITION=HUMVTNR Human cell adhesion protein (vitronectin) receptor alpha subunit mRNA, complete cds                               |
| 37432_g_at | 1.67 | 1.11  | 0.95 | Cluster Incl. AF077953:Homo sapiens protein inhibitor of activated STAT protein PIASx-alpha mRNA, complete cds /cds=(0,1718) /gb=AF077953 /gi=3643112  |
| 40116_at   | 1.67 | 1.62  | 1.36 | Cluster Incl. X15573:Human liver-type 1-phosphofructokinase (PFKL) mRNA, complete cds /cds=(55,2397) /gb=X15573 /gi=35430 /ug=Hs.155455 /len=2914      |
| 40355_at   | 1.67 | 1.12  | 1.77 | Cluster Incl. AJ006266:Homo sapiens mRNA for AND-1 protein /cds=(39,3428) /gb=AJ006266 /gi=3287172 /ug=Hs.72160 /len=4026                              |
| 40850_at   | 1.67 | 1.18  | 0.89 | Cluster Incl. L37033:Human FK-506 binding protein homologue (FKBP38) mRNA, complete cds /cds=(140,1207) /gb=L37033 /gi=965469 /ug=Hs.173464 /len=      |
| 1158_s_at  | 1.68 | 1.04  | 0.73 | J04046 /FEATURE=mRNA /DEFINITION=HUMCAMA Human calmodulin mRNA, complete cds                                                                           |
| 1633_g_at  | 1.68 | 2.15  | 1.78 | U77735 /FEATURE= /DEFINITION=HSU77735 Human pim-2 protooncogene homolog pim-2h mRNA, complete cds                                                      |
| 35665_at   | 1.69 | 1.04  | 1.66 | Cluster Incl. Z46973:H.sapiens mRNA for phosphatidylinositol 3-kinase /cds=(47,2710) /gb=Z46973 /gi=987947 /ug=Hs.32971 /len=2970                      |
| 38840_s_at | 1.69 | 1.56  | 1.81 | Cluster Incl. L10678:Human profilin II mRNA, complete cds /cds=(13,435) /gb=L10678 /gi=190387 /ug=Hs.91747 /len=1693                                   |
| 39770_at   | 1.69 | 1.25  | 1.07 | Cluster Incl. D87437:Human mRNA for KIAA0250 gene, complete cds /cds=(424,2832) /gb=D87437 /gi=1665768 /ug=Hs.15087 /len=5082                          |
| 40771_at   | 1.69 | 1.24  | 1.78 | Cluster Incl. Z98946:Human DNA sequence from clone 376D21 on chromosome Xq11.1-12 Contains the MSN gene for Moesin (Membrane-organizing Extensi        |
| 31892_at   | 1.70 | 1.26  | 1.68 | Cluster Incl. X58288:H.sapiens hR-PTPu gene for protein tyrosine phosphatase /cds=(0,4358) /gb=X58288 /gi=32455 /ug=Hs.154151 /len=4998                |
| 40818_at   | 1.70 | 1.19  | 1.55 | Cluster Incl. D14041:Homo sapiens mRNA for H-2K binding factor-2, complete cds /cds=(238,1500) /gb=D14041 /gi=2326266 /ug=Hs.172623 /len=5360          |
| 31979_at   | 1.70 | 1.05  | 1.15 | Cluster Incl. D49818:Homo sapiens mRNA for 6-phosphofructo-2-kinase/fructose-2, 6-bisphosphatase, complete cds /cds=(26,1435) /gb=D49818 /gi=1905760   |
| 40803_at   | 1.71 | 0.86  | 1.61 | Cluster Incl. AL050161:Homo sapiens mRNA; cDNA DKFZp586B0222 (from clone DKFZp586B0222) /cds=UNKNOWN /gb=AL050161 /gi=4884375 /ug=Hs.17                |
| 32080_at   | 1.71 | 1.12  | 1.13 | Cluster Incl. L11669:Human tetracycline transporter-like protein mRNA, complete cds /cds=(120,1487) /gb=L11669 /gi=307501 /ug=Hs.157145 /len=1758      |
| 33127_at   | 1.71 | 1.01  | 2.25 | Cluster Incl. U89942:Human lysyl oxidase-related protein (WS9-14) mRNA, complete cds /cds=(247,2571) /gb=U89942 /gi=1890107 /ug=Hs.83354 /len=3432     |
| 36119_at   | 1.71 | 0.76  | 1.28 | Cluster Incl. AF070648:Homo sapiens clone 24651 mRNA sequence /cds=UNKNOWN /gb=AF070648 /gi=3283922 /ug=Hs.74034 /len=1313                             |
| 37704_at   | 1.72 | 1.00  | 1.12 | Cluster Incl. Z14093:H.sapiens mRNA for branched chain decarboxylase alpha subunit /cds=(13,1350) /gb=Z14093 /gi=29390 /ug=Hs.78950 /len=1743          |
| 39087_at   | 1.72 | 1.00  | 1.07 | Cluster Incl. U28249:Human 11kd protein mRNA, complete cds /cds=(259,594) /gb=U28249 /gi=897916 /ug=Hs.92323 /len=1460                                 |
| 35322_at   | 1.72 | 1.25  | 1.66 | Cluster Incl. D50922:Human mRNA for KIAA0132 gene, complete cds /cds=(112,1986) /gb=D50922 /gi=1469186 /ug=Hs.57729 /len=2513                          |
| 33361_at   | 1.73 | 1.14  | 1.52 | Cluster Incl. AF052149:Homo sapiens clone 24733 mRNA sequence /cds=UNKNOWN /gb=AF052149 /gi=3360459 /ug=Hs.21970 /len=1633                             |
| 36130_f_at | 1.73 | 0.81  | 1.33 | Cluster Incl. R92331:yq03h03.r1 Homo sapiens cDNA, 5 end /clone=IMAGE-195893 /clone_end=5 /gb=R92331 /gi=959871 /ug=Hs.74170 /len=496                  |
| 36133_at   | 1.74 | 1.40  | 1.97 | Cluster Incl. AL031058:Human DNA sequence from clone 512B11 on chromosome 6p24-25. Contains the Desmoplakin I (DPI) gene, ESTs, STSs and GSSs /c       |
| 33260_at   | 1.74 | 11.39 | 6.85 | Cluster Incl. L13857:Human guanine nucleotide exchange factor mRNA, complete cds /cds=(0,4001) /gb=L13857 /gi=306777 /ug=Hs.180029 /len=4002           |
| 35955_at   | 1.75 | 0.88  | 1.22 | Cluster Incl. S80864:cytochrome c-like polypeptide [human, lung adenocarcinoma A549, mRNA, 1041 nt] /cds=(321,893) /gb=S80864 /gi=1911547 /ug=Hs.225   |
| 715_s_at   | 1.75 | 1.03  | 1.36 | D87002 /FEATURE=cds#4 /DEFINITION=D87002 Homo sapiens immunoglobulin lambda gene locus DNA, clone:31F3                                                 |

|            |      |      |      |                                                                                                                                                          |
|------------|------|------|------|----------------------------------------------------------------------------------------------------------------------------------------------------------|
| 35130_at   | 1.76 | 1.09 | 1.69 | Cluster Incl. X15722:Human mRNA for glutathione reductase (EC 1.6.4.2) /cds=(104,1543) /gb=X15722 /gi=31824 /ug=Hs.121524 /len=1618                      |
| 36032_at   | 1.76 | 1.19 | 1.29 | Cluster Incl. AL031427:dJ167A19.3 (novel protein) /cds=(123,557) /gb=AL031427 /gi=4835258 /ug=Hs.46967 /len=650                                          |
| 32321_at   | 1.76 | 0.97 | 1.48 | Cluster Incl. X56841:H.sapiens HLA-E gene /cds=(0,363) /gb=X56841 /gi=433491 /ug=Hs.181392 /len=1817                                                     |
| 35283_at   | 1.78 | 1.23 | 1.87 | Cluster Incl. H05692:y176b12.s1 Homo sapiens cDNA, 3 end /clone=IMAGE-43798 /clone_end=3 /gb=H05692 /gi=869244 /ug=Hs.5457 /len=631                      |
| 35980_at   | 1.78 | 1.29 | 1.54 | Cluster Incl. AB011153:Homo sapiens mRNA for KIAA0581 protein, partial cds /cds=(0,2097) /gb=AB011153 /gi=3043685 /ug=Hs.41143 /len=5147                 |
| 38968_at   | 1.78 | 2.23 | 2.67 | Cluster Incl. AB005047:Homo sapiens mRNA for SH3 binding protein, complete cds /cds=(63,1340) /gb=AB005047 /gi=3116213 /ug=Hs.109150 /len=2570           |
| 32837_at   | 1.79 | 1.19 | 1.17 | Cluster Incl. U56418:Human lysophosphatidic acid acyltransferase-beta mRNA, complete cds /cds=(39,875) /gb=U56418 /gi=2155239 /ug=Hs.209119 /len=135     |
| 39927_at   | 1.79 | 0.91 | 1.51 | Cluster Incl. U17032:Human p190-B (p190-B) mRNA, complete cds /cds=(302,4801) /gb=U17032 /gi=687592 /ug=Hs.37604 /len=4992                               |
| 38789_at   | 1.80 | 1.86 | 2.34 | Cluster Incl. L12711:Homo sapiens transketolase (tk) mRNA, complete cds /cds=(98,1969) /gb=L12711 /gi=388890 /ug=Hs.89643 /len=2069                      |
| 32739_at   | 1.80 | 0.95 | 1.30 | Cluster Incl. AA001791:zh86c04.r1 Homo sapiens cDNA, 5 end /clone=IMAGE-428166 /clone_end=5 /gb=AA001791 /gi=1445605 /ug=Hs.173637 /len=490              |
| 35816_at   | 1.80 | 0.87 | 0.85 | Cluster Incl. U46692:Human cystatin B gene, complete cds /cds=(96,392) /gb=U46692 /gi=1255783 /ug=Hs.695 /len=643                                        |
| 36336_s_at | 1.81 | 1.13 | 0.99 | Cluster Incl. AC005390:Homo sapiens chromosome 19, cosmid R31180 /cds=(0,4154) /gb=AC005390 /gi=3399675 /ug=Hs.153325 /len=4155                          |
| 40789_at   | 1.81 | 1.65 | 1.84 | Cluster Incl. U54645:Human adenylate kinase 2B (adk2b) gene, complete cds /cds=(3,701) /gb=U54645 /gi=1710886 /ug=Hs.171811 /len=2105                    |
| 34016_s_at | 1.81 | 1.57 | 1.81 | Cluster Incl. X78338:Synthetic adenovirus transformed human retina cell line, MRP mRNA /cds=UNKNOWN /gb=X78338 /gi=563909 /ug=Hs.89433 /len=5867         |
| 39691_at   | 1.81 | 1.37 | 1.57 | Cluster Incl. AB007960:chromosome 1 specific transcript KIAA0491 /cds=UNKNOWN /gb=AB007960 /gi=3413934 /ug=Hs.136309 /len=5717                           |
| 36992_at   | 1.81 | 1.18 | 2.68 | Cluster Incl. Al653621:tz21b11.x1 Homo sapiens cDNA, 3 end /clone=IMAGE-2289213 /clone_end=3 /gb=Al653621 /gi=4737600 /ug=Hs.76136 /len=598              |
| 37019_at   | 1.82 | 0.25 | 0.64 | Cluster Incl. J00129:Human fibrinogen beta-chain mRNA, partial cds /cds=UNKNOWN /gb=J00129 /gi=182429 /ug=Hs.7645 /len=1883                              |
| 2035_s_at  | 1.82 | 1.11 | 1.40 | M55914 /FEATURE= /DEFINITION=HUMCMYCQ Human c-myc binding protein (MBP-1) mRNA, complete cds                                                             |
| 39123_s_at | 1.82 | 1.00 | 1.10 | Cluster Incl. X89066:H.sapiens mRNA for TRPC1 protein /cds=(137,2416) /gb=X89066 /gi=1370118 /ug=Hs.94413 /len=4067                                      |
| 33805_at   | 1.82 | 0.88 | 1.40 | Cluster Incl. AB007949:Homo sapiens mRNA for KIAA0480 protein, complete cds /cds=(133,3891) /gb=AB007949 /gi=3413921 /ug=Hs.203281 /len=6111             |
| 36833_at   | 1.82 | 1.49 | 2.18 | Cluster Incl. U78027:Homo sapiens Brutons tyrosine kinase (BTK), alpha-D-galactosidase A (GLA), L44-like ribosomal protein (L44L) and FTP3 (FTP3) genes. |
| 1374_g_at  | 1.82 | 1.66 | 1.47 | M31523 /FEATURE= /DEFINITION=HUMTFAA Human transcription factor (E2A) mRNA, complete cds                                                                 |
| 32332_at   | 1.83 | 1.03 | 0.87 | Cluster Incl. X69433:H.sapiens mRNA for mitochondrial isocitrate dehydrogenase (NADP+) /cds=(86,1444) /gb=X69433 /gi=872120 /ug=Hs.182740 /len=1751      |
| 39020_at   | 1.83 | 1.24 | 1.09 | Cluster Incl. U82938:Human CD27BP (Siva) mRNA, complete cds /cds=(252,821) /gb=U82938 /gi=2228596 /ug=Hs.112058 /len=1034                                |
| 41221_at   | 1.83 | 1.14 | 1.77 | Cluster Incl. J04173:Homo sapiens phosphoglycerate mutase (PGAM-B) mRNA, complete cds /cds=(31,795) /gb=J04173 /gi=551173 /ug=Hs.181013 /len=170         |
| 33358_at   | 1.83 | 1.04 | 1.41 | Cluster Incl. W29087:56b8 Homo sapiens cDNA /gb=W29087 /gi=1309053 /ug=Hs.21894 /len=877                                                                 |
| 35140_at   | 1.83 | 1.20 | 1.70 | Cluster Incl. R59697:yh11b03.s1 Homo sapiens cDNA, 3 end /clone=IMAGE-42880 /clone_end=3 /gb=R59697 /gi=830392 /ug=Hs.25283 /len=580                     |
| 34734_at   | 1.84 | 0.75 | 1.54 | Cluster Incl. X71661:H.sapiens ERGIC-53 mRNA /cds=(21,1553) /gb=X71661 /gi=433937 /ug=Hs.239563 /len=2768                                                |
| 38810_at   | 1.84 | 0.86 | 1.13 | Cluster Incl. AF039241:AF039241 Homo sapiens cDNA /clone=11-67js /gb=AF039241 /gi=2773145 /ug=Hs.9028 /len=3197                                          |
| 39517_at   | 1.84 | 1.19 | 1.60 | Cluster Incl. AF035313:Homo sapiens clone 23851 mRNA sequence /cds=UNKNOWN /gb=AF035313 /gi=2661075 /ug=Hs.10065 /len=1369                               |
| 1020_s_at  | 1.84 | 1.05 | 1.44 | U85611 /FEATURE= /DEFINITION=HSU85611 Human DNA-PK interaction protein (KIP) mRNA, complete cds                                                          |
| 36611_at   | 1.86 | 1.21 | 1.60 | Cluster Incl. U25849:Human red cell-type low molecular weight acid phosphatase (ACP1) gene, 5 flanking region and /cds=(775,1251) /gb=U25849 /gi=114781  |
| 39070_at   | 1.86 | 1.90 | 2.00 | Cluster Incl. U03057:Human actin bundling protein (HSN) mRNA, complete cds /cds=(111,1592) /gb=U03057 /gi=458027 /ug=Hs.118400 /len=2767                 |
| 33218_at   | 1.86 | 0.53 | 0.85 | Cluster Incl. M11730:Human tyrosine kinase-type receptor (HER2) mRNA, complete cds /cds=(150,3917) /gb=M11730 /gi=183986 /ug=Hs.173664 /len=4530         |
| 32066_g_at | 1.86 | 1.15 | 1.47 | Cluster Incl. S68134:CREM=cyclic AMP-responsive element modulator beta isoform [human, mRNA, 1030 nt] /cds=(0,1001) /gb=S68134 /gi=545206 /ug=Hs.1       |
| 1844_s_at  | 1.86 | 1.18 | 1.85 | L05624 /FEATURE= /DEFINITION=HUMMCK Homo sapiens MAP kinase kinase mRNA, complete cds                                                                    |
| 41470_at   | 1.87 | 0.98 | 1.65 | Cluster Incl. AF027208:Homo sapiens AC133 antigen mRNA, complete cds /cds=(37,2634) /gb=AF027208 /gi=2688948 /ug=Hs.112360 /len=3794                     |
| 40130_at   | 1.87 | 1.25 | 1.50 | Cluster Incl. U06863:Human follistatin-related protein precursor mRNA, complete cds /cds=(91,1017) /gb=U06863 /gi=536897 /ug=Hs.155712 /len=1987         |
| 34428_at   | 1.87 | 1.73 | 1.74 | Cluster Incl. D50312:Human mRNA for uKATP-1, complete cds /cds=(270,1544) /gb=D50312 /gi=1109633 /ug=Hs.102308 /len=1747                                 |
| 40828_at   | 1.89 | 1.20 | 1.44 | Cluster Incl. D63476:Human mRNA for KIAA0142 gene, complete cds /cds=(473,2413) /gb=D63476 /gi=1469865 /ug=Hs.172813 /len=5032                           |
| 40791_at   | 1.89 | 1.43 | 1.56 | Cluster Incl. X63564:H.sapiens mRNA for RNA polymerase II largest subunit /cds=(386,6298) /gb=X63564 /gi=36123 /ug=Hs.171880 /len=6732                   |
| 37256_at   | 1.89 | 1.45 | 1.40 | Cluster Incl. Al829890:wj47a06.x1 Homo sapiens cDNA, 3 end /clone=IMAGE-2405938 /clone_end=3 /gb=Al829890 /gi=5450561 /ug=Hs.78524 /len=571              |
| 33791_at   | 1.89 | 1.65 | 2.21 | Cluster Incl. Y15227:Homo sapiens mRNA for leukemia associated gene 1 /cds=(267,485) /gb=Y15227 /gi=2664278 /ug=Hs.20149 /len=981                        |
| 37463_r_at | 1.90 | 0.97 | 1.33 | Cluster Incl. L21990:Human spliceosomal protein (SAP 62) gene, complete cds /cds=(0,1394) /gb=L21990 /gi=409218 /ug=Hs.115232 /len=1395                  |
| 34003_at   | 1.90 | 1.08 | 1.68 | Cluster Incl. U47924:Human chromosome 12p13 sequence /cds=(373,1122) /gb=U47924 /gi=1633547 /ug=Hs.83848 /len=1843                                       |
| 32600_at   | 1.93 | 1.31 | 1.24 | Cluster Incl. AC004382:Homo sapiens Chromosome 16 BAC clone CIT987SK-A-152E5 /cds=(0,935) /gb=AC004382 /gi=3252819 /ug=Hs.79402 /len=1659                |
| 39822_s_at | 1.93 | 0.80 | 2.06 | Cluster Incl. AF078077:Homo sapiens growth arrest and DNA-damage-inducible protein GADD45beta mRNA, complete cds /cds=(100,582) /gb=AF078077 /gi=        |



|            |      |      |      |                                                                                                                                                              |
|------------|------|------|------|--------------------------------------------------------------------------------------------------------------------------------------------------------------|
| 35655_at   | 1.94 | 1.47 | 2.54 | Cluster Incl. AB002377:Human mRNA for KIAA0379 gene, partial cds /cds=(0,2649) /gb=AB002377 /gi=2224698 /ug=Hs.32556 /len=5457                               |
| 38790_at   | 1.94 | 1.03 | 1.77 | Cluster Incl. L25879:Homo sapiens p53/HEH epoxide hydrolase (EPHX) mRNA, complete cds /cds=(196,1563) /gb=L25879 /gi=450270 /ug=Hs.89649 /len=17             |
| 36961_at   | 1.94 | 1.14 | 1.72 | Cluster Incl. AL050286:Homo sapiens mRNA; cDNA DKFZp586A011 (from clone DKFZp586A011) /cds=(330,632) /gb=AL050286 /gi=4886472 /ug=Hs.75884 /                 |
| 38324_at   | 1.94 | 0.91 | 1.41 | Cluster Incl. AD000684:Homo sapiens DNA from chromosome 19-cosmid R30879 containing USF2, genomic sequence /cds=(0,1290) /gb=AD000684 /gi=1905               |
| 1642_at    | 1.94 | 0.95 | 1.18 | U35113 /FEATURE= /DEFINITION=HSU35113 Human metastasis-associated mta1 mRNA, complete cds                                                                    |
| 36852_at   | 1.95 | 1.42 | 1.83 | Cluster Incl. U42349:Human N33 mRNA, complete cds /cds=(157,1203) /gb=U42349 /gi=1353672 /ug=Hs.71119 /len=1342                                              |
| 39411_at   | 1.95 | 5.31 | 5.20 | Cluster Incl. AL080156:Homo sapiens mRNA; cDNA DKFZp434J214 (from clone DKFZp434J214) /cds=(0,1081) /gb=AL080156 /gi=5262614 /ug=Hs.12813 /le                |
| 995_g_at   | 1.95 | 1.35 | 2.04 | X58288 /FEATURE=mRNA /DEFINITION=HSRPTPU H.sapiens hR-PTPu gene for protein tyrosine phosphatase                                                             |
| 36736_f_at | 1.95 | 0.78 | 1.52 | Cluster Incl. Y10275:H.sapiens mRNA for L-3-phosphoserine phosphatase /cds=(187,864) /gb=Y10275 /gi=1890330 /ug=Hs.56407 /len=1574                           |
| 33989_f_at | 1.96 | 1.01 | 1.59 | Cluster Incl. W28869:53h2 Homo sapiens cDNA /gb=W28869 /gi=1308880 /ug=Hs.74637 /len=975                                                                     |
| 39594_f_at | 1.96 | 0.98 | 1.41 | Cluster Incl. R93527:yq35f10.r1 Homo sapiens cDNA, 5 end /clone=IMAGE-197803 /clone_end=5 /gb=R93527 /gi=967693 /ug=Hs.2667 /len=368                         |
| 34058_at   | 1.96 | 0.89 | 1.73 | Cluster Incl. L15309:Human zinc finger protein (ZNF141) mRNA, complete cds /cds=(156,1580) /gb=L15309 /gi=347905 /ug=Hs.193677 /len=2985                     |
| 36591_at   | 1.98 | 1.42 | 1.41 | Cluster Incl. X06956:Human HALPHA44 gene for alpha-tubulin, exons 1-3 /cds=(0,1343) /gb=X06956 /gi=32014 /ug=Hs.75318 /len=1344                              |
| 41074_at   | 1.98 | 1.01 | 3.07 | Cluster Incl. AF062006:Homo sapiens orphan G protein-coupled receptor HG38 mRNA, complete cds /cds=(48,2771) /gb=AF062006 /gi=3366801 /ug=Hs.9838            |
| 36723_at   | 1.98 | 1.30 | 0.83 | Cluster Incl. X87870:H.sapiens mRNA for hepatocyte nuclear factor 4a /cds=(99,1466) /gb=X87870 /gi=1595751 /ug=Hs.54424 /len=2288                            |
| 35155_at   | 1.98 | 1.31 | 0.84 | Cluster Incl. AC005306:Homo sapiens chromosome 19, cosmid R27216 /cds=(0,893) /gb=AC005306 /gi=3334980 /ug=Hs.25817 /len=894                                 |
| 38878_at   | 1.99 | 1.05 | 1.45 | Cluster Incl. W22520:68G3 Homo sapiens cDNA /clone=(not-directional) /gb=W22520 /gi=1299353 /ug=Hs.194117 /len=574                                           |
| 40634_at   | 2.01 | 1.19 | 1.42 | Cluster Incl. M86667:H.sapiens NAP (nucleosome assembly protein) mRNA, complete cds /cds=(75,1250) /gb=M86667 /gi=189066 /ug=Hs.179662 /len=1560             |
| 38839_at   | 2.01 | 1.44 | 1.97 | Cluster Incl. AL096719:Homo sapiens mRNA; cDNA DKFZp566N043 (from clone DKFZp566N043) /cds=UNKNOWN /gb=AL096719 /gi=5419854 /ug=Hs.9174                      |
| 37828_at   | 2.01 | 1.06 | 2.13 | Cluster Incl. AL050064:Homo sapiens mRNA; cDNA DKFZp566L033 (from clone DKFZp566L033) /cds=UNKNOWN /gb=AL050064 /gi=4884294 /ug=Hs.12987                     |
| 37829_at   | 2.01 | 1.37 | 1.58 | Cluster Incl. U95032:Human growth-arrest-specific protein 2 mRNA, complete cds /cds=(66,1007) /gb=U95032 /gi=2738231 /ug=Hs.129818 /len=1994                 |
| 38526_at   | 2.01 | 0.96 | 1.15 | Cluster Incl. U02882:Human rolipram-sensitive 3,5 -cyclic AMP phosphodiesterase mRNA, complete cds /cds=(108,1922) /gb=U02882 /gi=433346 /ug=Hs.172          |
| 37312_at   | 2.01 | 2.92 | 2.81 | Cluster Incl. D50917:Human mRNA for KIAA0127 gene, complete cds /cds=(297,1241) /gb=D50917 /gi=1469176 /ug=Hs.77293 /len=5544                                |
| 2092_s_at  | 2.01 | 1.00 | 1.86 | J04765 /FEATURE= /DEFINITION=HUMOSTRO Human osteopontin mRNA, complete cds                                                                                   |
| 36943_r_at | 2.02 | 0.77 | 1.72 | Cluster Incl. U81992:Homo sapiens C2H2 zinc finger protein PLAGL1 (PLAGL1) mRNA, complete cds /cds=(176,1411) /gb=U81992 /gi=3513452 /ug=Hs.7582             |
| 39430_at   | 2.02 | 1.05 | 1.11 | Cluster Incl. AF082557:Homo sapiens TRF1-interacting ankyrin-related ADP-ribose polymerase mRNA, partial cds /cds=(0,3284) /gb=AF082557 /gi=3929220 /        |
| 36070_at   | 2.02 | 1.77 | 2.34 | Cluster Incl. AL049389:Homo sapiens mRNA; cDNA DKFZp586O0118 (from clone DKFZp586O0118) /cds=UNKNOWN /gb=AL049389 /gi=4500182 /ug=Hs.50                      |
| 38376_at   | 2.02 | 1.73 | 1.28 | Cluster Incl. L46590:Homo sapiens very long chain acyl-CoA dehydrogenase gene, exons 1-20, complete cds /cds=(88,2055) /gb=L46590 /gi=1008851 /ug=Hs         |
| 40964_at   | 2.02 | 0.62 | 1.73 | Cluster Incl. Z46376:H.sapiens HK2 mRNA for hexokinase II /cds=(1490,4243) /gb=Z46376 /gi=587201 /ug=Hs.198427 /len=5292                                     |
| 40049_at   | 2.03 | 1.29 | 1.46 | Cluster Incl. X76104:H.sapiens DAP-kinase mRNA /cds=(336,4631) /gb=X76104 /gi=2094872 /ug=Hs.153924 /len=5896                                                |
| 1826_at    | 2.04 | 1.61 | 1.33 | M12174 /FEATURE= /DEFINITION=HUMRHOA Human ras-related rho mRNA (clone 6), partial cds                                                                       |
| 33163_r_at | 2.04 | 1.12 | 3.53 | Cluster Incl. L35546:Homo sapiens gamma-glutamylcysteine synthetase light subunit mRNA, complete cds /cds=(253,1077) /gb=L35546 /gi=530136 /ug=Hs.89         |
| 35798_at   | 2.04 | 1.03 | 0.98 | Cluster Incl. W25936:15b5 Homo sapiens cDNA /gb=W25936 /gi=1306059 /ug=Hs.6789 /len=738                                                                      |
| 37230_at   | 2.04 | 1.35 | 2.70 | Cluster Incl. AB007938:Homo sapiens mRNA for KIAA0469 protein, complete cds /cds=(184,1803) /gb=AB007938 /gi=3413899 /ug=Hs.7764 /len=6450                   |
| 34789_at   | 2.05 | 1.16 | 1.17 | Cluster Incl. S69272:cytoplasmic antiproteinase=38 kda intracellular serine proteinase inhibitor [human, placenta, mRNA, 1465 nt] /cds=(188,1318) /gb=S69272 |
| 37900_at   | 2.05 | 1.42 | 1.26 | Cluster Incl. AF093670:Homo sapiens peroxisomal biogenesis factor (PEX11b) mRNA, complete cds /cds=(16,795) /gb=AF093670 /gi=3907593 /ug=Hs.83023            |
| 39993_at   | 2.06 | 0.97 | 1.49 | Cluster Incl. D11466:Homo sapiens mRNA for PIG-A protein, complete cds /cds=(85,1539) /gb=D11466 /gi=219993 /ug=Hs.51 /len=3589                              |
| 32622_at   | 2.07 | 1.18 | 1.57 | Cluster Incl. L36983:Homo sapiens dynamin (DNM) mRNA, complete cds /cds=(144,2744) /gb=L36983 /gi=1196422 /ug=Hs.167013 /len=3601                            |
| 1752_at    | 2.09 | 0.72 | 0.62 | AD000092 /FEATURE=cds#6 /DEFINITION=CH19HHR23 Homo sapiens DNA from chromosome 19p13.2 cosmids R31240, R30272 and R28549 containing t                        |
| 38073_at   | 2.09 | 1.04 | 1.73 | Cluster Incl. AB007858:Homo sapiens KIAA0398 mRNA, complete cds /cds=(196,1626) /gb=AB007858 /gi=2662076 /ug=Hs.8086 /len=6203                               |
| 34803_at   | 2.10 | 1.41 | 1.68 | Cluster Incl. AF022789:Homo sapiens ubiquitin hydrolyzing enzyme I (UBH1) mRNA, partial cds /cds=(152,1219) /gb=AF022789 /gi=3220153 /ug=Hs.42400 /le        |
| 39037_at   | 2.11 | 1.58 | 2.01 | Cluster Incl. L13773:Human AF-4 mRNA, complete cds /cds=(420,4052) /gb=L13773 /gi=306446 /ug=Hs.114765 /len=9379                                             |
| 41446_f_at | 2.12 | 0.86 | 1.37 | Cluster Incl. H68340:yr82b10.s1 Homo sapiens cDNA, 3 end /clone=IMAGE-211771 /clone_end=3 /gb=H68340 /gi=1027080 /ug=Hs.110440 /len=484                      |
| 37377_i_at | 2.13 | 0.98 | 1.34 | Cluster Incl. M13452:Human lamin A mRNA, 3end /cds=(0,1547) /gb=M13452 /gi=186838 /ug=Hs.77886 /len=2522                                                     |
| AFFX-HUMT  | 2.13 | 0.97 | 1.83 | M11507 Human transferrin receptor mRNA, complete cds ( _5_ , _M_ , _3 represent transcript regions 5 prime, Middle, and 3 prime respectively)                |
| 34478_at   | 2.14 | 0.82 | 0.95 | Cluster Incl. X79780:H.sapiens YPT3 mRNA /cds=(6,662) /gb=X79780 /gi=763129 /ug=Hs.115279 /len=701                                                           |
| 609_f_at   | 2.14 | 1.02 | 1.54 | M13485 /FEATURE=cds /DEFINITION=HUMMT1B2 Human metallothionein I-B gene, exon 3                                                                              |

|            |      |      |      |                                                                                                                                                         |
|------------|------|------|------|---------------------------------------------------------------------------------------------------------------------------------------------------------|
| 37640_at   | 2.15 | 1.21 | 2.37 | Cluster Incl. M31642:Human hypoxanthine phosphoribosyltransferase (HPRT) mRNA, complete cds /cds=(85,741) /gb=M31642 /gi=184349 /ug=Hs.82314 /len=      |
| 36466_at   | 2.15 | 1.92 | 2.33 | Cluster Incl. U26742:Human dystrobrevin-delta mRNA, complete cds /cds=(324,1448) /gb=U26742 /gi=1255988 /ug=Hs.54435 /len=1707                          |
| 36155_at   | 2.17 | 0.96 | 1.43 | Cluster Incl. D87465:Human mRNA for KIAA0275 gene, complete cds /cds=(316,1590) /gb=D87465 /gi=1665814 /ug=Hs.74583 /len=5316                           |
| 1005_at    | 2.18 | 0.29 | 1.27 | X68277 /FEATURE=cds /DEFINITION=HSCL100 H.sapiens CL 100 mRNA for protein tyrosine phosphatase                                                          |
| 38546_at   | 2.18 | 1.04 | 1.60 | Cluster Incl. AB006537:Homo sapiens mRNA for interleukin 1 receptor accessory protein, complete cds /cds=(206,1918) /gb=AB006537 /gi=3041772 /ug=Hs.1   |
| 1591_s_at  | 2.19 | 0.80 | 0.66 | J03242 /FEATURE= /DEFINITION=HUMGFIL2 Human insulin-like growth factor II mRNA, complete cds                                                            |
| 37192_at   | 2.19 | 1.05 | 1.54 | Cluster Incl. U28389:Human dematin 52 kDa subunit mRNA, complete cds /cds=(450,1667) /gb=U28389 /gi=899540 /ug=Hs.75936 /len=2727                       |
| 41073_at   | 2.21 | 1.69 | 2.20 | Cluster Incl. A1743745:wg53d06.x1 Homo sapiens cDNA, 3 end /clone=IMAGE-2368811 /clone_end=3 /gb=A1743745 /gi=5112033 /ug=Hs.98384 /len=553             |
| 36873_at   | 2.22 | 0.68 | 1.50 | Cluster Incl. D16532:Human gene for very low density lipoprotein receptor, 5flanking and /cds=(615,3236) /gb=D16532 /gi=407220 /ug=Hs.73729 /len=3853   |
| 40679_at   | 2.22 | 1.01 | 1.21 | Cluster Incl. U27699:Human pepHGT-1 betaine-GABA transporter mRNA, complete cds /cds=(586,2430) /gb=U27699 /gi=881474 /ug=Hs.82535 /len=3410            |
| 34520_at   | 2.23 | 1.00 | 1.12 | Cluster Incl. AJ012582:Homo sapiens mRNA for hyperpolarization-activated cation channel HCN2 /cds=(53,2722) /gb=AJ012582 /gi=4775348 /ug=Hs.124161      |
| 32043_at   | 2.25 | 0.59 | 1.99 | Cluster Incl. AF098462:Homo sapiens stanniocalcin-related protein mRNA, complete cds /cds=(134,1042) /gb=AF098462 /gi=4050037 /ug=Hs.155223 /len=23     |
| 40961_at   | 2.25 | 0.91 | 1.78 | Cluster Incl. X72889:H.sapiens hbrm mRNA /cds=(222,4982) /gb=X72889 /gi=414116 /ug=Hs.198296 /len=5862                                                  |
| 40686_at   | 2.26 | 1.44 | 1.91 | Cluster Incl. A1985272:ws06b05.x1 Homo sapiens cDNA, 3 end /clone=IMAGE-2496369 /clone_end=3 /gb=A1985272 /gi=5812641 /ug=Hs.83321 /len=666             |
| 38643_at   | 2.26 | 0.97 | 1.30 | Cluster Incl. W87466:zh67c05.s1 Homo sapiens cDNA, 3 end /clone=IMAGE-417128 /clone_end=3 /gb=W87466 /gi=1401521 /ug=Hs.102479 /len=587                 |
| 41629_at   | 2.27 | 1.48 | 1.56 | Cluster Incl. U31449:Human intestinal and liver tetraspan membrane protein (il-TMP) mRNA, complete cds /cds=(165,773) /gb=U31449 /gi=953238 /ug=Hs.118  |
| 37983_at   | 2.27 | 1.30 | 1.55 | Cluster Incl. S77410:type 1 angiotensin II receptor [human, liver, mRNA, 2268 nt] /cds=(334,1413) /gb=S77410 /gi=999393 /ug=Hs.89472 /len=2268          |
| 36782_s_at | 2.28 | 0.89 | 0.57 | Cluster Incl. J03242:Human insulin-like growth factor II mRNA, complete cds /cds=(552,1094) /gb=J03242 /gi=183123 /ug=Hs.75963 /len=1356                |
| 36565_at   | 2.28 | 1.65 | 1.77 | Cluster Incl. X98253:H.sapiens ZNF183 gene /cds=(210,1241) /gb=X98253 /gi=2274981 /ug=Hs.64794 /len=1349                                                |
| 38138_at   | 2.28 | 0.86 | 1.46 | Cluster Incl. D38583:Human mRNA for calcizzarin, complete cds /cds=(120,437) /gb=D38583 /gi=560790 /ug=Hs.150580 /len=595                               |
| 32592_at   | 2.28 | 1.05 | 1.17 | Cluster Incl. AB002321:Human mRNA for KIAA0323 gene, partial cds /cds=(0,2175) /gb=AB002321 /gi=2224586 /ug=Hs.7911 /len=6227                           |
| 37677_at   | 2.30 | 1.05 | 2.10 | Cluster Incl. V00572:Human mRNA encoding phosphoglycerate kinase /cds=(79,1332) /gb=V00572 /gi=35434 /ug=Hs.78771 /len=1767                             |
| 39648_at   | 2.30 | 1.30 | 1.77 | Cluster Incl. AB015594:Homo sapiens mRNA for Pex11p, complete cds /cds=(95,838) /gb=AB015594 /gi=3461891 /ug=Hs.31034 /len=1158                         |
| 36673_at   | 2.31 | 1.02 | 1.54 | Cluster Incl. X76057:H.sapiens PMI1 mRNA for phosphomannose isomerase /cds=(5,1276) /gb=X76057 /gi=416016 /ug=Hs.75694 /len=1771                        |
| 33721_at   | 2.31 | 1.46 | 1.99 | Cluster Incl. U49248:Human canalicular multispecific organic anion transporter (cMOAT), gene, complete cds /cds=(101,4738) /gb=U49248 /gi=1574997 /ug=H |
| 41607_at   | 2.31 | 0.99 | 1.93 | Cluster Incl. U09550:Human oviductal glycoprotein mRNA, complete cds /cds=(12,2048) /gb=U09550 /gi=1184036 /ug=Hs.1154 /len=2198                        |
| 36864_at   | 2.33 | 1.29 | 2.51 | Cluster Incl. AJ001625:Homo sapiens mRNA for Pex3 protein /cds=(63,1184) /gb=AJ001625 /gi=3336881 /ug=Hs.7277 /len=1963                                 |
| 37639_at   | 2.34 | 0.84 | 0.95 | Cluster Incl. X07732:Human hepatoma mRNA for serine protease hepsin /cds=UNKNOWN /gb=X07732 /gi=32063 /ug=Hs.823 /len=2363                              |
| 837_s_at   | 2.37 | 1.30 | 2.81 | U43944 /FEATURE= /DEFINITION=HSU43944 Human breast cancer cytosolic NADP(+)-dependent malic enzyme mRNA, partial cds                                    |
| 33789_at   | 2.38 | 1.19 | 2.07 | Cluster Incl. AF088219:Homo sapiens CC chemokine gene cluster, complete sequence /cds=(55,396) /gb=AF088219 /gi=3719360 /ug=Hs.20144 /len=579           |
| 31824_at   | 2.38 | 2.07 | 4.70 | Cluster Incl. AL049699:dJ747H23.1 (malic enzyme 1, soluble (NADP-dependent malic enzyme, malate oxidoreductase, EC 1.1.1.40)) /cds=(0,1014) /gb=AL049   |
| 40652_at   | 2.39 | 1.04 | 1.84 | Cluster Incl. D50925:Human mRNA for KIAA0135 gene, partial cds /cds=(0,3727) /gb=D50925 /gi=1469192 /ug=Hs.79337 /len=3997                              |
| 34951_at   | 2.41 | 5.35 | 1.96 | Cluster Incl. D10923:Human mRNA for HM74 /cds=(60,1223) /gb=D10923 /gi=219866 /ug=Hs.137555 /len=2041                                                   |
| 35688_g_at | 2.42 | 1.25 | 1.28 | Cluster Incl. Z24459:H.sapiens MTCP1 gene, exons 2A to 7 (and joined mRNA) /cds=(1419,1625) /gb=Z24459 /gi=2252491 /ug=Hs.3548 /len=1847                |
| 36184_at   | 2.44 | 1.05 | 1.84 | Cluster Incl. L06419:Homo sapiens lysyl hydroxylase (PLOD) mRNA, complete cds /cds=(200,2383) /gb=L06419 /gi=190073 /ug=Hs.75093 /len=3115              |
| AFFX-HUMTI | 2.44 | 0.83 | 1.74 | M11507 Human transferrin receptor mRNA, complete cds ( _5_ _M_ _3 represent transcript regions 5 prime, Middle, and 3 prime respectively)               |
| 41485_at   | 2.44 | 1.34 | 2.47 | Cluster Incl. X02152:Human mRNA for lactate dehydrogenase-A (LDH-A, EC 1.1.1.27) /cds=(97,1095) /gb=X02152 /gi=34312 /ug=Hs.2795 /len=1661              |
| 37209_g_at | 2.44 | 0.90 | 1.68 | Cluster Incl. AJ001612:Homo sapiens mRNA for L-3-phosphoserine-phosphatase homologue /cds=(161,379) /gb=AJ001612 /gi=2407908 /ug=Hs.76845 /len=8        |
| 36990_at   | 2.45 | 1.45 | 2.05 | Cluster Incl. X04741:Human mRNA for protein gene product (PGP) 9.5 /cds=(31,669) /gb=X04741 /gi=35439 /ug=Hs.76118 /len=1014                            |
| 39425_at   | 2.46 | 1.55 | 3.24 | Cluster Incl. X91247:H.sapiens mRNA for thioredoxin reductase /cds=(439,1932) /gb=X91247 /gi=1237037 /ug=Hs.13046 /len=3826                             |
| 40837_at   | 2.47 | 1.52 | 1.43 | Cluster Incl. M99436:Human transducin-like enhancer protein (TLE2) mRNA, complete cds /cds=(25,2256) /gb=M99436 /gi=307511 /ug=Hs.173063 /len=2271      |
| 38545_at   | 2.48 | 0.48 | 1.07 | Cluster Incl. M31682:Human testicular inhibin beta-B-subunit mRNA, 3 end /cds=(0,1162) /gb=M31682 /gi=186422 /ug=Hs.1735 /len=2689                      |
| 37999_at   | 2.49 | 0.99 | 2.00 | Cluster Incl. D16611:Human mRNA for coproporphyrinogen oxidase, complete cds /cds=(93,1157) /gb=D16611 /gi=469488 /ug=Hs.89866 /len=2333                |
| 32140_at   | 2.50 | 1.07 | 1.36 | Cluster Incl. Y08110:H.sapiens mRNA for mosaic protein LR11 /cds=(80,6724) /gb=Y08110 /gi=1552323 /ug=Hs.166294 /len=6840                               |
| 36814_at   | 2.51 | 1.25 | 1.40 | Cluster Incl. AB029032:Homo sapiens mRNA for KIAA1109 protein, partial cds /cds=(0,5873) /gb=AB029032 /gi=5689554 /ug=Hs.6606 /len=6377                 |
| 35703_at   | 2.52 | 1.16 | 1.54 | Cluster Incl. X06374:Human mRNA for platelet-derived growth factor PDGF-A /cds=(403,993) /gb=X06374 /gi=35363 /ug=Hs.37040 /len=2305                    |
| 770_at     | 2.52 | 1.34 | 2.17 | D00632 /FEATURE= /DEFINITION=HUMGSHPPXA Homo sapiens mRNA for glutathione peroxidase, complete cds                                                      |

|            |      |      |      |                                                                                                                                                         |
|------------|------|------|------|---------------------------------------------------------------------------------------------------------------------------------------------------------|
| 40127_at   | 2.56 | 1.25 | 1.38 | Cluster Incl. M95929:Human homeobox protein (PHOX1) mRNA, 3 end /cds=(0,599) /gb=M95929 /gi=189946 /ug=Hs.155606 /len=1433                              |
| 35177_at   | 2.61 | 1.46 | 2.17 | Cluster Incl. AB018268:Homo sapiens mRNA for KIAA0725 protein, partial cds /cds=(0,1722) /gb=AB018268 /gi=3882170 /ug=Hs.26450 /len=3911                |
| 36758_at   | 2.64 | 1.47 | 2.92 | Cluster Incl. AF070578:Homo sapiens clone 24674 mRNA sequence /cds=UNKNOWN /gb=AF070578 /gi=3387950 /ug=Hs.71168 /len=1688                              |
| 37027_at   | 2.66 | 0.81 | 1.24 | Cluster Incl. M80899:Human novel protein AHNAK mRNA, partial sequence /cds=(0,3835) /gb=M80899 /gi=178282 /ug=Hs.76549 /len=4051                        |
| 346_s_at   | 2.67 | 1.33 | 1.47 | D13814 /FEATURE= /DEFINITION=HUMAGRT1B Homo sapiens mRNA for angiotensin II type 1b receptor, complete cds                                              |
| 32378_at   | 2.69 | 1.03 | 1.86 | Cluster Incl. M26252:Human TCB gene encoding cytosolic thyroid hormone-binding protein, complete cds /cds=(89,1684) /gb=M26252 /gi=338826 /ug=Hs.198    |
| 36508_at   | 2.70 | 1.27 | 1.38 | Cluster Incl. AF030186:Homo sapiens glypican-4 (GPC4) mRNA, complete cds /cds=(212,1882) /gb=AF030186 /gi=3831546 /ug=Hs.58367 /len=3724                |
| 649_s_at   | 2.70 | 0.92 | 1.62 | L06797 /FEATURE= /DEFINITION=HUMGPCR Human (clone L5) orphan G protein-coupled receptor mRNA, complete cds                                              |
| 33186_i_at | 2.72 | 0.93 | 1.57 | Cluster Incl. AL046961:DKFZp586J0417_r1 Homo sapiens cDNA, 5 end /clone=DKFZp586J0417 /clone_end=5 /gb=AL046961 /gi=5435017 /ug=Hs.93125 /le            |
| 39522_at   | 2.73 | 0.88 | 2.34 | Cluster Incl. D49817:Homo sapiens mRNA for 6-phosphofructo-2-kinase/fructose-2, 6-bisphosphatase, complete cds /cds=(18,1580) /gb=D49817 /gi=1468914    |
| 1243_at    | 2.74 | 0.96 | 1.36 | U18300 /FEATURE= /DEFINITION=HSU18300 Human damage-specific DNA binding protein p48 subunit (DDB2) mRNA, complete cds                                   |
| 37574_at   | 2.74 | 0.90 | 2.95 | Cluster Incl. L43821:Homo sapiens enhancer of filamentation (HEF1) mRNA, complete cds /cds=(163,2667) /gb=L43821 /gi=1294780 /ug=Hs.80261 /len=3817     |
| 36142_at   | 2.76 | 1.30 | 1.70 | Cluster Incl. X79204:H.sapiens SCA1 mRNA for ataxin /cds=(935,3385) /gb=X79204 /gi=529661 /ug=Hs.74520 /len=10603                                       |
| 38739_at   | 2.78 | 1.10 | 2.51 | Cluster Incl. AF017257:Homo sapiens chromosome 21 derived BAC containing erythroblastosis virus oncogene homolog 2 protein (ets-2) gene, complete cds / |
| 37883_i_at | 2.79 | 1.03 | 1.77 | Cluster Incl. AI375033:ta66e10.x1 Homo sapiens cDNA, 3 end /clone=IMAGE-2049066 /clone_end=3 /gb=AI375033 /gi=4175023 /ug=Hs.145567 /len=536            |
| 38313_at   | 2.81 | 1.91 | 2.25 | Cluster Incl. AB028985:Homo sapiens mRNA for KIAA1062 protein, partial cds /cds=(0,4589) /gb=AB028985 /gi=5689460 /ug=Hs.94806 /len=5285                |
| 39338_at   | 2.81 | 0.89 | 2.21 | Cluster Incl. AI201310:q71b11.x1 Homo sapiens cDNA, 3 end /clone=IMAGE-1755453 /clone_end=3 /gb=AI201310 /gi=3753916 /ug=Hs.119301 /len=655             |
| 35284_f_at | 2.83 | 1.00 | 1.57 | Cluster Incl. W28620:49c2 Homo sapiens cDNA /gb=W28620 /gi=1308568 /ug=Hs.5457 /len=865                                                                 |
| 37208_at   | 2.85 | 1.01 | 1.94 | Cluster Incl. AJ001612:Homo sapiens mRNA for L-3-phosphoserine-phosphatase homologue /cds=(161,379) /gb=AJ001612 /gi=2407908 /ug=Hs.76845 /len=8        |
| 37002_at   | 2.91 | 1.07 | 1.55 | Cluster Incl. D32143:Human mRNA for biliverdin-IXbeta reductase I /cds=(109,729) /gb=D32143 /gi=699602 /ug=Hs.76289 /len=824                            |
| 1953_at    | 2.92 | 0.75 | 1.98 | AF024710 /FEATURE= /DEFINITION=AF024710 Homo sapiens vascular endothelial growth factor (VEGF) mRNA, 3 UTR                                              |
| 41852_at   | 2.93 | 0.87 | 1.50 | Cluster Incl. U22377:Human Zn-15 related zinc finger protein (rf) mRNA, complete cds /cds=(12,5756) /gb=U22377 /gi=1218027 /ug=Hs.13321 /len=6229       |
| 32538_at   | 2.94 | 1.47 | 2.07 | Cluster Incl. S95936:transferrin [human, liver, mRNA, 2347 nt] /cds=(79,2175) /gb=S95936 /gi=248647 /ug=Hs.75155 /len=2347                              |
| 38825_at   | 2.95 | 0.52 | 5.91 | Cluster Incl. M64982:Human fibrinogen alpha chain gene, complete mRNAs /cds=(0,2600) /gb=M64982 /gi=458553 /ug=Hs.90765 /len=2601                       |
| 1962_at    | 2.95 | 0.97 | 1.32 | M14502 /FEATURE=mRNA /DEFINITION=HUMARGL Human liver arginase mRNA, complete cds                                                                        |
| 41531_at   | 2.97 | 1.04 | 2.41 | Cluster Incl. AI445461:tj34g07.x1 Homo sapiens cDNA, 3 end /clone=IMAGE-2143452 /clone_end=3 /gb=AI445461 /gi=4288374 /ug=Hs.3337 /len=775              |
| 34804_at   | 3.01 | 1.39 | 2.14 | Cluster Incl. AL049246:Homo sapiens mRNA; cDNA DKFZp564C053 (from clone DKFZp564C053) /cds=UNKNOWN /gb=AL049246 /gi=4499983 /ug=Hs.4248                 |
| 38970_s_at | 3.02 | 1.04 | 1.73 | Cluster Incl. AJ011896:Homo sapiens mRNA for HIV-1, Nef-associated factor 1 beta (Naf1 beta) /cds=(110,2017) /gb=AJ011896 /gi=3758820 /ug=Hs.109281 /   |
| 40425_at   | 3.03 | 0.96 | 1.19 | Cluster Incl. M57730:Human B61 mRNA, complete cds /cds=(73,690) /gb=M57730 /gi=179320 /ug=Hs.1624 /len=1480                                             |
| 37433_at   | 3.07 | 1.07 | 2.25 | Cluster Incl. AF077954:Homo sapiens protein inhibitor of activated STAT protein PIASx-beta mRNA, complete cds /cds=(0,1865) /gb=AF077954 /gi=3643114 /  |
| 32336_at   | 3.08 | 1.40 | 2.72 | Cluster Incl. X05236:Human fibroblast mRNA for aldolase A /cds=(146,1240) /gb=X05236 /gi=28596 /ug=Hs.183760 /len=1440                                  |
| 32963_s_at | 3.10 | 0.89 | 1.16 | Cluster Incl. W07549:32d11 Homo sapiens cDNA /gb=W07549 /gi=1307353 /ug=Hs.235634 /len=912                                                              |
| 40838_at   | 3.11 | 1.17 | 2.48 | Cluster Incl. AB011102:Homo sapiens mRNA for KIAA0530 protein, partial cds /cds=(0,4692) /gb=AB011102 /gi=3043583 /ug=Hs.173081 /len=6578               |
| 1764_s_at  | 3.11 | 0.87 | 1.16 | D85131 /FEATURE= /DEFINITION=D85131 Homo sapiens mRNA for Myc-associated zinc-finger protein of human islet, complete cds                               |
| 34378_at   | 3.17 | 0.80 | 1.91 | Cluster Incl. X97324:H.sapiens mRNA for adipophilin /cds=(0,1313) /gb=X97324 /gi=1806039 /ug=Hs.3416 /len=1314                                          |
| 36100_at   | 3.18 | 0.72 | 1.89 | Cluster Incl. AF022375:Homo sapiens vascular endothelial growth factor mRNA, complete cds /cds=(701,1276) /gb=AF022375 /gi=3719220 /ug=Hs.73793 /len    |
| AFFX-HUMTF | 3.19 | 0.88 | 2.73 | M11507 Human transferrin receptor mRNA, complete cds ( _5_ , _M_ , _3 represent transcript regions 5 prime, Middle, and 3 prime respectively)           |
| 892_at     | 3.24 | 1.02 | 2.14 | M90657 /FEATURE= /DEFINITION=HUML6A Human tumor antigen (L6) mRNA, complete cds                                                                         |
| 35780_at   | 3.25 | 0.75 | 0.92 | Cluster Incl. AF035292:Homo sapiens clone 23584 mRNA sequence /cds=UNKNOWN /gb=AF035292 /gi=2661046 /ug=Hs.6654 /len=1685                               |
| 35489_at   | 3.31 | 3.22 | 2.38 | Cluster Incl. M82962:Human N-benzoyl-L-tyrosyl-p-amino-benzoic acid hydrolase alpha subunit (PPH alpha) mRNA, complete cds /cds=(9,2249) /gb=M82962 /   |
| 35214_at   | 3.32 | 1.55 | 4.33 | Cluster Incl. AF061016:Homo sapiens UDP-glucose dehydrogenase (UGDH) mRNA, complete cds /cds=(78,1562) /gb=AF061016 /gi=3127126 /ug=Hs.28309 /          |
| 41360_at   | 3.32 | 1.34 | 2.22 | Cluster Incl. AA044787:zk74c11.r1 Homo sapiens cDNA, 5 end /clone=IMAGE-488564 /clone_end=5 /gb=AA044787 /gi=1523055 /ug=Hs.26703 /len=679              |
| 39122_at   | 3.41 | 1.14 | 2.55 | Cluster Incl. K03515:Human neuroleukin mRNA, complete cds /cds=(15,1691) /gb=K03515 /gi=189237 /ug=Hs.944 /len=1987                                     |
| 38975_at   | 3.41 | 1.11 | 1.88 | Cluster Incl. AF062534:Homo sapiens genethonin 1 mRNA, complete cds /cds=(127,1203) /gb=AF062534 /gi=3851521 /ug=Hs.109590 /len=2340                    |
| 33113_at   | 3.48 | 0.92 | 1.85 | Cluster Incl. U65093:Human msg1-related gene 1 (mrg1) mRNA, complete cds /cds=(199,840) /gb=U65093 /gi=1853998 /ug=Hs.82071 /len=899                    |
| 37680_at   | 3.56 | 0.68 | 1.46 | Cluster Incl. U81607:Homo sapiens gravin mRNA, complete cds /cds=(191,5536) /gb=U81607 /gi=2218076 /ug=Hs.788 /len=6596                                 |
| 35781_g_at | 3.57 | 0.87 | 1.11 | Cluster Incl. AF035292:Homo sapiens clone 23584 mRNA sequence /cds=UNKNOWN /gb=AF035292 /gi=2661046 /ug=Hs.6654 /len=1685                               |



|            |       |      |      |                                                                                                                                                                        |
|------------|-------|------|------|------------------------------------------------------------------------------------------------------------------------------------------------------------------------|
| 38637_at   | 3.59  | 0.30 | 0.98 | Cluster Incl. L16895:Human lysyl oxidase (LOX) gene, exon 7 /cds=(0,6) /gb=L16895 /gi=292923 /ug=Hs.102267 /len=2052                                                   |
| 36101_s_at | 3.60  | 0.79 | 1.40 | Cluster Incl. M63978:Human vascular endothelial growth factor gene /cds=(1038,1685) /gb=M63978 /gi=340214 /ug=Hs.73793 /len=1723                                       |
| 38465_at   | 3.66  | 1.00 | 2.01 | Cluster Incl. M37721:Human peptidylglycine alpha-amidating monooxygenase mRNA, complete cds /cds=(188,3112) /gb=M37721 /gi=189594 /ug=Hs.83920 /len=2052               |
| 38876_at   | 3.70  | 1.45 | 2.09 | Cluster Incl. AL080091:Homo sapiens mRNA; cDNA DKFZp564L0862 (from clone DKFZp564L0862) /cds=(0,831) /gb=AL080091 /gi=5262510 /ug=Hs.19404 /len=2052                   |
| 38411_at   | 3.74  | 1.14 | 1.71 | Cluster Incl. U90916:Human clone 23815 mRNA sequence /cds=UNKNOWN /gb=U90916 /gi=1913897 /ug=Hs.82845 /len=1868                                                        |
| 32001_s_at | 3.86  | 0.86 | 1.44 | Cluster Incl. M80482:Human subtilisin-like protein (PACE4) mRNA, complete cds /cds=(169,3078) /gb=M80482 /gi=189531 /ug=Hs.211938 /len=4403                            |
| 31850_at   | 3.89  | 1.31 | 4.76 | Cluster Incl. M90656:Human gamma-glutamylcysteine synthetase (GCS) mRNA, complete cds /cds=(92,2005) /gb=M90656 /gi=183038 /ug=Hs.151393 /len=2052                     |
| 32643_at   | 3.90  | 1.18 | 2.79 | Cluster Incl. L07956:Homo sapiens 1,4-alpha-glucan branching enzyme (HGBE) mRNA, complete cds /cds=(90,2198) /gb=L07956 /gi=184025 /ug=Hs.1691 /len=2052               |
| 40790_at   | 4.03  | 0.78 | 3.38 | Cluster Incl. AB004066:Homo sapiens mRNA for DEC1, complete cds /cds=(196,1434) /gb=AB004066 /gi=2308996 /ug=Hs.171825 /len=2922                                       |
| 35724_at   | 4.11  | 1.57 | 4.01 | Cluster Incl. Y07867:H.sapiens mRNA for Pirin, isolate 1 /cds=(204,1076) /gb=Y07867 /gi=1907075 /ug=Hs.38842 /len=1277                                                 |
| 37299_at   | 4.11  | 0.95 | 2.24 | Cluster Incl. J04501:Human muscle glycogen synthase mRNA, complete cds /cds=(160,2373) /gb=J04501 /gi=183354 /ug=Hs.772 /len=3531                                      |
| 41503_at   | 4.18  | 1.21 | 2.38 | Cluster Incl. AB020661:Homo sapiens mRNA for KIAA0854 protein, complete cds /cds=(304,2817) /gb=AB020661 /gi=4240196 /ug=Hs.30209 /len=4089                            |
| 39827_at   | 4.39  | 0.79 | 3.87 | Cluster Incl. AA522530:ni38d12.s1 Homo sapiens cDNA, 3 end /clone=IMAGE-979127 /clone_end=3 /gb=AA522530 /gi=2263242 /ug=Hs.111244 /len=891                            |
| 39551_at   | 4.42  | 1.19 | 2.47 | Cluster Incl. N98667:yy66d05.r1 Homo sapiens cDNA, 5 end /clone=IMAGE-278505 /clone_end=5 /gb=N98667 /gi=1270089 /ug=Hs.106826 /len=549                                |
| 39008_at   | 4.46  | 1.51 | 2.23 | Cluster Incl. M13699:Human ceruloplasmin (ferroxidase) mRNA, complete cds /cds=(0,3197) /gb=M13699 /gi=180255 /ug=Hs.111461 /len=3321                                  |
| 40448_at   | 4.51  | 1.27 | 2.36 | Cluster Incl. M92843:H.sapiens zinc finger transcriptional regulator mRNA, complete cds /cds=(59,1039) /gb=M92843 /gi=183442 /ug=Hs.1665 /len=1746                     |
| 36480_at   | 4.57  | 1.17 | 2.49 | Cluster Incl. X80497:H.sapiens PHKLA mRNA /cds=(126,3833) /gb=X80497 /gi=663009 /ug=Hs.54941 /len=4566                                                                 |
| 32664_at   | 4.62  | 0.77 | 1.93 | Cluster Incl. D37931:Human mRNA for RNase 4, complete cds /cds=(27,470) /gb=D37931 /gi=976228 /ug=Hs.169617 /len=996                                                   |
| 35785_at   | 4.67  | 0.95 | 3.12 | Cluster Incl. W28281:47e7 Homo sapiens cDNA /gb=W28281 /gi=1308436 /ug=Hs.6673 /len=882                                                                                |
| 37383_f_at | 4.71  | 1.39 | 2.40 | Cluster Incl. X58536:Human mRNA for HLA class I locus C heavy chain /cds=(15,1115) /gb=X58536 /gi=32234 /ug=Hs.77961 /len=1549                                         |
| 1103_at    | 4.73  | 0.85 | 1.68 | M11567 /FEATURE=mRNA /DEFINITION=HUMAGG Human angiogenin gene, complete cds, and three Alu repetitive sequences                                                        |
| 35686_s_at | 4.82  | 1.57 | 1.63 | Cluster Incl. Z24459:H.sapiens MTCP1 gene, exons 2A to 7 (and joined mRNA) /cds=(581,787) /gb=Z24459 /gi=2252491 /ug=Hs.3548 /len=1009                                 |
| 1519_at    | 4.89  | 0.94 | 2.88 | J04102 /FEATURE= /DEFINITION=HUMETS2A Human erythroblastosis virus oncogene homolog 2 (ets-2) mRNA, complete cds                                                       |
| 39365_i_at | 4.95  | 0.98 | 1.04 | Cluster Incl. Y18207:Homo sapiens mRNA for protein phosphatase 1 (PPP1R5) /cds=(91,1044) /gb=Y18207 /gi=3805818 /ug=Hs.12112 /len=1158                                 |
| 35194_at   | 5.05  | 0.98 | 6.27 | Cluster Incl. X53463:Human mRNA for glutathione peroxidase-like protein /cds=(51,623) /gb=X53463 /gi=31894 /ug=Hs.2704 /len=951                                        |
| 31488_s_at | 5.20  | 1.17 | 3.69 | Cluster Incl. S81916:phosphoglycerate kinase [alternatively spliced] [human, phosphoglycerate kinase deficient patient with episodes of muscl, mRNA Partial M          |
| 32210_at   | 5.39  | 1.07 | 2.79 | Cluster Incl. M83088:Human phosphoglucomutase 1 (PGM1) mRNA, complete cds /cds=(62,1750) /gb=M83088 /gi=189925 /ug=Hs.1869 /len=2320                                   |
| 33143_s_at | 5.41  | 1.23 | 2.96 | Cluster Incl. U81800:Homo sapiens monocarboxylate transporter (MCT3) mRNA, complete cds /cds=(62,1459) /gb=U81800 /gi=2463633 /ug=Hs.85838 /len=1459                   |
| 34786_at   | 5.55  | 1.06 | 4.66 | Cluster Incl. AB018285:Homo sapiens mRNA for KIAA0742 protein, partial cds /cds=(0,3712) /gb=AB018285 /gi=3882204 /ug=Hs.4096 /len=4309                                |
| 39366_at   | 5.73  | 0.93 | 1.65 | Cluster Incl. N36638:yx88f05.r1 Homo sapiens cDNA, 5 end /clone=IMAGE-268833 /clone_end=5 /gb=N36638 /gi=1157780 /ug=Hs.12112 /len=543                                 |
| 748_s_at   | 5.79  | 0.99 | 2.59 | D63940 /FEATURE=mRNA /DEFINITION=HUMHMXI1HL Human mRNA for Mxi1 protein, complete cds                                                                                  |
| 33802_at   | 6.03  | 0.51 | 3.85 | Cluster Incl. Z82244:bk286B10.2 (Heme Oxygenase 1 (HO-1, EC 1.14.99.3)) /cds=(82,948) /gb=Z82244 /gi=3191962 /ug=Hs.202833 /len=1558                                   |
| 33748_at   | 6.13  | 1.00 | 1.15 | Cluster Incl. D86976:Human mRNA for KIAA0223 gene, partial cds /cds=(0,3498) /gb=D86976 /gi=1504025 /ug=Hs.196914 /len=4121                                            |
| 38331_at   | 6.91  | 1.31 | 4.00 | Cluster Incl. Y07566:H.sapiens mRNA for RIT protein /cds=(145,804) /gb=Y07566 /gi=1702927 /ug=Hs.96038 /len=1093                                                       |
| 34342_s_at | 6.93  | 1.01 | 4.65 | Cluster Incl. AF052124:Homo sapiens clone 23810 osteopontin mRNA, complete cds /cds=(87,989) /gb=AF052124 /gi=3360431 /ug=Hs.313 /len=1504                             |
| 33642_s_at | 7.07  | 0.96 | 2.33 | Cluster Incl. U17986:Human GABA/noradrenaline transporter mRNA, complete cds /cds=(29,2227) /gb=U17986 /gi=602433 /ug=Hs.169240 /len=2425                              |
| 34795_at   | 7.11  | 0.80 | 5.58 | Cluster Incl. U84573:Homo sapiens lysyl hydroxylase isoform 2 (PLOD2) mRNA, complete cds /cds=(0,2213) /gb=U84573 /gi=2138313 /ug=Hs.41270 /len=3482                   |
| 35833_at   | 7.25  | 1.01 | 3.12 | Cluster Incl. AL080184:Homo sapiens mRNA; cDNA DKFZp434O071 (from clone DKFZp434O071) /cds=UNKNOWN /gb=AL080184 /gi=5262661 /ug=Hs.7089                                |
| 672_at     | 7.39  | 1.03 | 2.08 | J03764 /FEATURE=cds /DEFINITION=HUMPAIA Human, plasminogen activator inhibitor-1 gene, exons 2 to 9                                                                    |
| 33251_at   | 8.73  | 1.88 | 9.04 | Cluster Incl. AB018322:Homo sapiens mRNA for KIAA0779 protein, partial cds /cds=(0,962) /gb=AB018322 /gi=3882278 /ug=Hs.179507 /len=3743                               |
| 34390_at   | 8.76  | 1.10 | 3.91 | Cluster Incl. U90441:Human prollyl 4-hydroxylase alpha (II) subunit mRNA, complete cds /cds=(187,1794) /gb=U90441 /gi=2439984 /ug=Hs.3622 /len=2194                    |
| 39805_at   | 9.24  | 2.19 | 4.69 | Cluster Incl. AF070598:Homo sapiens clone 24410 ABC transporter mRNA, partial cds /cds=(0,1537) /gb=AF070598 /gi=3387976 /ug=Hs.107911 /len=1704                       |
| 39120_at   | 9.41  | 1.58 | 9.20 | Cluster Incl. AA224832:nc33b06.s1 Homo sapiens cDNA /clone=IMAGE-1009907 /gb=AA224832 /gi=1846120 /ug=Hs.94360 /len=447                                                |
| 32331_at   | 9.52  | 0.92 | 3.00 | Cluster Incl. X60673:Human AK3 mRNA for adenylyate kinase 3 /cds=UNKNOWN /gb=X60673 /gi=28576 /ug=Hs.182740 /len=1692                                                  |
| 37399_at   | 9.57  | 0.99 | 9.91 | Cluster Incl. D17793:Human mRNA for KIAA0119 gene, complete cds /cds=(51,1022) /gb=D17793 /gi=457407 /ug=Hs.78183 /len=1204                                            |
| 31508_at   | 9.93  | 1.79 | 8.89 | Cluster Incl. S73591:brain-expressed HHCPA78 homolog [human, HL-60 acute promyelocytic leukemia cells, mRNA, 2704 nt] /cds=(221,1396) /gb=S73591 /gi=1157780 /len=1396 |
| 1232_s_at  | 10.01 | 2.18 | 3.55 | M74587 /FEATURE=mRNA /DEFINITION=HUMIGFBP1A Human insulin-like growth factor binding protein (hIGFBP1) gene, complete cds                                              |

|            |        |       |        |                                                                                                                                                         |
|------------|--------|-------|--------|---------------------------------------------------------------------------------------------------------------------------------------------------------|
| 39072_at   | 10.35  | 1.62  | 7.06   | Cluster Incl. L07648:Human MXI1 mRNA, complete cds /cds=(208,894) /gb=L07648 /gi=506626 /ug=Hs.118630 /len=2400                                         |
| 38125_at   | 10.63  | 6.19  | 13.67  | Cluster Incl. M14083:Human beta-migrating plasminogen activator inhibitor I mRNA, 3 end /cds=(0,1151) /gb=M14083 /gi=189566 /ug=Hs.82085 /len=2937      |
| 36386_at   | 10.81  | 1.14  | 8.69   | Cluster Incl. L42450:Homo sapiens pyruvate dehydrogenase kinase isoenzyme 1 (PDK1) mRNA, complete cds /cds=(124,1434) /gb=L42450 /gi=1088280 /ug=       |
| 38379_at   | 11.24  | 1.00  | 3.60   | Cluster Incl. X76534:H.sapiens NMB mRNA /cds=(91,1773) /gb=X76534 /gi=666042 /ug=Hs.82226 /len=2656                                                     |
| 39436_at   | 11.61  | 1.00  | 5.56   | Cluster Incl. AF079221:Homo sapiens BCL2/adenovirus E1B 19kDa-interacting protein 3a mRNA, complete cds /cds=(82,741) /gb=AF079221 /gi=3342914 /ug      |
| 40926_at   | 12.05  | 1.27  | 5.83   | Cluster Incl. U36341:Human Xq28 cosmid, creatine transporter (SLC6A8) gene, complete cds, and CDM gene, partial cds /cds=(638,2545) /gb=U36341 /gi=10:  |
| 654_at     | 12.22  | 1.45  | 7.05   | L07648 /FEATURE= /DEFINITION=HUMMXI1A Human MXI1 mRNA, complete cds                                                                                     |
| 38010_at   | 13.15  | 1.18  | 8.44   | Cluster Incl. AF002697:Homo sapiens E1B 19K/Bcl-2-binding protein Nip3 mRNA, nuclear gene encoding mitochondrial protein, complete cds /cds=(126,710) / |
| 37037_at   | 13.37  | 1.19  | 11.07  | Cluster Incl. M24486:Human prolyl 4-hydroxylase alpha subunit mRNA, complete cds, clone PA-11 /cds=(118,1722) /gb=M24486 /gi=190785 /ug=Hs.76768 /le    |
| 40193_at   | 26.75  | 1.11  | 4.06   | Cluster Incl. X51956:Human ENO2 gene for neuron specific (gamma) enolase /cds=(222,1526) /gb=X51956 /gi=31164 /ug=Hs.146580 /len=2422                   |
| 2079_s_at  | 27.64  | 0.98  | 0.61   | M13970 /FEATURE=mRNA /DEFINITION=HUMGFI21 Human insulin-like growth factor (IGF-II) gene, exon 1 of 4                                                   |
| 34777_at   | 33.13  | 1.85  | 11.00  | Cluster Incl. D14874:Homo sapiens mRNA for adrenomedullin precursor, complete cds /cds=(156,713) /gb=D14874 /gi=455470 /ug=Hs.394 /len=1449             |
| 40309_at   | 39.37  | 2.20  | 20.29  | Cluster Incl. X66839:H.sapiens MaTu MN mRNA for p54/58N protein /cds=(42,1421) /gb=X66839 /gi=1000701 /ug=Hs.63287 /len=1552                            |
| 32805_at   | 64.02  | 0.86  | 97.92  | Cluster Incl. U05861:Human hepatic dihydrodiol dehydrogenase gene /cds=(26,997) /gb=U05861 /gi=487134 /ug=Hs.201967 /len=1222                           |
| 32392_s_at | 80.74  | 77.73 | 295.36 | Cluster Incl. M57951:Human bilirubin UDP-glucuronosyltransferase isozyme 2 mRNA, complete cds /cds=(29,1633) /gb=M57951 /gi=184474 /ug=Hs.233441 /l     |
| 36933_at   | 127.74 | 1.17  | 27.90  | Cluster Incl. D87953:Human mRNA for RTP, complete cds /cds=(122,1306) /gb=D87953 /gi=1596166 /ug=Hs.75789 /len=3014                                     |

| Probe Set  | Co   | TCDD | TCDD+Co | Descriptions                                                                                                                                               |
|------------|------|------|---------|------------------------------------------------------------------------------------------------------------------------------------------------------------|
| 742_at     | 0.10 | 0.08 | 0.08    | D49742 /FEATURE= /DEFINITION=HUMHGFAL Human mRNA for HGF activator like protein, complete cds                                                              |
| 39352_at   | 0.52 | 0.08 | 0.21    | Cluster Incl. S70585:thyroid-stimulating hormone alpha subunit [human, Genomic, 1327 nt 4 segments] /cds=(100,450) /gb=S70585 /gi=1683259 /ug=Hs.119689 /l |
| 34297_at   | 0.17 | 0.09 | 0.11    | Cluster Incl. U87460:Human putative endothelin receptor type B-like protein mRNA, complete cds /cds=(1778,3619) /gb=U87460 /gi=2076881 /ug=Hs.27747 /len=4 |
| 32570_at   | 0.17 | 0.13 | 0.17    | Cluster Incl. L76465:Homo sapiens NAD+-dependent 15 hydroxyprostaglandin dehydrogenase (PGDH) mRNA, complete cds /cds=(17,817) /gb=L76465 /gi=12039        |
| 33130_at   | 0.26 | 0.13 | 0.09    | Cluster Incl. AW001001.wr91d06.x1 Homo sapiens cDNA, 3 end /clone=IMAGE-2495051 /clone_end=3 /gb=AW001001 /gi=5847917 /ug=Hs.83465 /len=621                |
| 32112_s_at | 0.27 | 0.15 | 0.14    | Cluster Incl. AI800499:tc11f11.x1 Homo sapiens cDNA, 3 end /clone=IMAGE-2063565 /clone_end=3 /gb=AI800499 /gi=5365971 /ug=Hs.161002 /len=403               |
| 1970_s_at  | 0.40 | 0.16 | 0.18    | Z71929 /FEATURE=cds /DEFINITION=HSFGFR2MR H.sapiens FGFR2 mRNA                                                                                             |
| 32193_at   | 0.38 | 0.16 | 0.18    | Cluster Incl. AF030339:Homo sapiens receptor for viral semaphorin protein (VESPR) mRNA, complete cds /cds=(249,4955) /gb=AF030339 /gi=3176761 /ug=Hs.18    |
| 40374_at   | 0.44 | 0.16 | 0.24    | Cluster Incl. X83703:H.sapiens mRNA for cytokine inducible nuclear protein /cds=(249,1208) /gb=X83703 /gi=793840 /ug=Hs.74019 /len=1885                    |
| 32640_at   | 0.32 | 0.17 | 0.13    | Cluster Incl. M24283:Human major group rhinovirus receptor (HRV) mRNA, complete cds /cds=(71,1669) /gb=M24283 /gi=184532 /ug=Hs.168383 /len=3003           |
| 1363_at    | 0.28 | 0.17 | 0.08    | M87770 /FEATURE= /DEFINITION=HUMKSAMI Human fibroblast growth factor receptor (K-sam) mRNA, complete cds                                                   |
| 1143_s_at  | 0.29 | 0.17 | 0.17    | Fibroblast Growth Factor Receptor K-Sam, Alt. Splice 3, K-Sam III                                                                                          |
| 408_at     | 0.18 | 0.19 | 0.09    | X54489 /FEATURE=mRNA /DEFINITION=HSMGSAG Human gene for melanoma growth stimulatory activity (MGSA)                                                        |
| 1369_s_at  | 0.72 | 0.19 | 0.52    | M28130 /FEATURE=mRNA /DEFINITION=HUMIL8A Human interleukin 8 (IL8) gene, complete cds                                                                      |
| 32369_at   | 0.24 | 0.21 | 0.23    | Cluster Incl. M81349:H.sapiens serum amyloid A protein mRNA, complete cds /cds=(75,467) /gb=M81349 /gi=337749 /ug=Hs.1955 /len=614                         |
| 35372_r_at | 0.67 | 0.22 | 0.50    | Cluster Incl. M17017:Human beta-thromboglobulin-like protein mRNA, complete cds /cds=(90,389) /gb=M17017 /gi=179579 /ug=Hs.624 /len=1639                   |
| 36638_at   | 0.29 | 0.22 | 0.17    | Cluster Incl. X78947:H.sapiens mRNA for connective tissue growth factor /cds=(145,1194) /gb=X78947 /gi=474933 /ug=Hs.75511 /len=2312                       |
| 35025_at   | 0.32 | 0.25 | 0.29    | Cluster Incl. X78686:H.sapiens ENA-78 mRNA /cds=(106,450) /gb=X78686 /gi=471242 /ug=Hs.89714 /len=1145                                                     |
| 37019_at   | 1.82 | 0.25 | 0.64    | Cluster Incl. J00129:Human fibrinogen beta-chain mRNA, partial cds /cds=UNKNOWN /gb=J00129 /gi=182429 /ug=Hs.7645 /len=1883                                |
| 33436_at   | 0.34 | 0.25 | 0.17    | Cluster Incl. Z46629:Homo sapiens SOX9 mRNA /cds=(359,1888) /gb=Z46629 /gi=758102 /ug=Hs.2316 /len=3923                                                    |
| 37483_at   | 0.45 | 0.26 | 0.52    | Cluster Incl. AB018287:Homo sapiens mRNA for KIAA0744 protein, complete cds /cds=(150,1922) /gb=AB018287 /gi=3882208 /ug=Hs.116753 /len=4238               |
| 37322_s_at | 0.23 | 0.27 | 0.22    | Cluster Incl. X82460:H.sapiens mRNA for 15-hydroxy prostaglandin dehydrogenase /cds=(0,536) /gb=X82460 /gi=1164906 /ug=Hs.77348 /len=660                   |
| 37024_at   | 0.76 | 0.27 | 0.36    | Cluster Incl. AF010312:Homo sapiens Pig7 (PIG7) mRNA, complete cds /cds=(79,765) /gb=AF010312 /gi=2415299 /ug=Hs.76507 /len=1677                           |
| 32588_s_at | 0.40 | 0.28 | 0.23    | Cluster Incl. X78992:H.sapiens ERF-2 mRNA /cds=(66,1544) /gb=X78992 /gi=509777 /ug=Hs.78909 /len=1629                                                      |
| 40082_at   | 0.34 | 0.28 | 0.30    | Cluster Incl. D10040:Homo sapiens mRNA for long-chain acyl-CoA synthetase, complete cds /cds=(13,2109) /gb=D10040 /gi=219899 /ug=Hs.154890 /len=3634       |
| 1005_at    | 2.18 | 0.29 | 1.27    | X68277 /FEATURE=cds /DEFINITION=HSCL100 H.sapiens CL 100 mRNA for protein tyrosine phosphatase                                                             |
| 41246_at   | 0.70 | 0.30 | 0.88    | Cluster Incl. AI743134.wg87f07.x1 Homo sapiens cDNA, 3 end /clone=IMAGE-2372101 /clone_end=3 /gb=AI743134 /gi=5111422 /ug=Hs.21858 /len=853                |
| 38637_at   | 3.59 | 0.30 | 0.98    | Cluster Incl. L16895:Human lysyl oxidase (LOX) gene, exon 7 /cds=(0,6) /gb=L16895 /gi=292923 /ug=Hs.102267 /len=2052                                       |
| 38772_at   | 0.30 | 0.31 | 0.50    | Cluster Incl. Y11307:H.sapiens CYR61 mRNA /cds=(223,1368) /gb=Y11307 /gi=2791897 /ug=Hs.8867 /len=2052                                                     |
| 39581_at   | 1.20 | 0.31 | 0.63    | Cluster Incl. AA570193.nf38c11.s1 Homo sapiens cDNA /clone=IMAGE-916052 /gb=AA570193 /gi=2344173 /ug=Hs.2621 /len=450                                      |
| 39215_at   | 1.50 | 0.31 | 0.42    | Cluster Incl. AL021155:dJ934G17.3 (Brain Natriuretic Protein BNP) /cds=(232,636) /gb=AL021155 /gi=3171888 /ug=Hs.219140 /len=825                           |
| 35410_at   | 0.32 | 0.31 | 0.24    | Cluster Incl. U81234:Human chemokine alpha 3 (CKA-3) mRNA, complete cds /cds=(63,407) /gb=U81234 /gi=4098960 /ug=Hs.164021 /len=1528                       |
| 359_at     | 0.90 | 0.32 | 0.58    | Y10659 /FEATURE=cds /DEFINITION=HSIL13RA H.sapiens IL-13Ra mRNA                                                                                            |
| 31792_at   | 0.65 | 0.32 | 0.46    | Cluster Incl. M20560:Human lipocortin-III mRNA, complete cds /cds=(46,1017) /gb=M20560 /gi=186967 /ug=Hs.1378 /len=1339                                    |
| 34823_at   | 0.83 | 0.32 | 0.37    | Cluster Incl. X60708:Human pCHDP7 mRNA for liver dipeptidyl peptidase IV /cds=(75,2375) /gb=X60708 /gi=35335 /ug=Hs.44926 /len=3407                        |
| 35926_s_at | 0.51 | 0.33 | 0.28    | Cluster Incl. AF004230:Homo sapiens monocyte/macrophage Ig-related receptor MIR-7 (MIR cl-7) mRNA, complete cds /cds=(170,2125) /gb=AF004230 /gi=23431     |
| 32113_at   | 0.57 | 0.33 | 0.31    | Cluster Incl. U83115:Human non-lens beta gamma-crystallin like protein (AIM1) mRNA, partial cds /cds=(0,4913) /gb=U83115 /gi=2072424 /ug=Hs.161002 /len=67 |
| 38842_at   | 0.75 | 0.33 | 0.50    | Cluster Incl. AB023206:Homo sapiens mRNA for KIAA0989 protein, partial cds /cds=(0,2580) /gb=AB023206 /gi=4589621 /ug=Hs.92186 /len=4412                   |
| 37243_at   | 0.22 | 0.33 | 0.24    | Cluster Incl. X66533:H.sapiens soluble guanylate cyclase small subunit mRNA /cds=(88,1947) /gb=X66533 /gi=31685 /ug=Hs.77890 /len=2443                     |
| 41260_at   | 1.44 | 0.36 | 0.51    | Cluster Incl. U59321:Human DEAD-box protein p72 (P72) mRNA, complete cds /cds=(0,1952) /gb=U59321 /gi=1592564 /ug=Hs.227342 /len=2010                      |
| 41536_at   | 1.27 | 0.36 | 0.92    | Cluster Incl. AL022726:Human DNA sequence from clone 625H18 on chromosome 6p22.2-23. Contains the gene for ID4 Helix-loop-helix DNA binding protein and    |
| 37236_at   | 0.62 | 0.36 | 0.29    | Cluster Incl. M11437:Human kininogen gene /cds=(0,1934) /gb=M11437 /gi=186752 /ug=Hs.77741 /len=1935                                                       |

|            |      |      |      |                                                                                                                                                                 |
|------------|------|------|------|-----------------------------------------------------------------------------------------------------------------------------------------------------------------|
| 38178_at   | 0.60 | 0.36 | 0.26 | Cluster Incl. L40802:Homo sapiens 17-beta-hydroxysteroid dehydrogenase (17-HSD) gene /cds=(167,1330) /gb=L40802 /gi=1008837 /ug=Hs.155109 /len=1427             |
| 39760_at   | 0.56 | 0.37 | 0.39 | Cluster Incl. AL031781:dJ51J12.1.3 (human ortholog of mouse KH Domain RNA Binding protein QKI-7 (isoform 3)) /cds=(0,692) /gb=AL031781 /gi=4038570 /ug=H        |
| 33328_at   | 0.48 | 0.38 | 0.32 | Cluster Incl. W28612:49b3 Homo sapiens cDNA /gb=W28612 /gi=1308560 /ug=Hs.184724 /len=809                                                                       |
| 35362_at   | 0.39 | 0.38 | 0.29 | Cluster Incl. AB018342:Homo sapiens mRNA for KIAA0799 protein, partial cds /cds=(0,2138) /gb=AB018342 /gi=3882318 /ug=Hs.61638 /len=5613                        |
| 753_at     | 0.48 | 0.38 | 0.41 | D86425 /FEATURE= /DEFINITION=D86425 Homo sapiens mRNA for osteonidogen, complete cds                                                                            |
| 39542_at   | 0.72 | 0.39 | 0.48 | Cluster Incl. AF059611:Homo sapiens nuclear matrix protein NRP/B (NRPB) mRNA, complete cds /cds=(399,2168) /gb=AF059611 /gi=3309572 /ug=Hs.104925 /le           |
| 41320_s_at | 0.27 | 0.39 | 0.40 | Cluster Incl. U69609:Human transcriptional repressor (GCF2) mRNA, complete cds /cds=(124,2382) /gb=U69609 /gi=3421044 /ug=Hs.239894 /len=3505                   |
| 40928_at   | 1.52 | 0.40 | 0.64 | Cluster Incl. W26496:30d2 Homo sapiens cDNA /gb=W26496 /gi=1307195 /ug=Hs.187991 /len=825                                                                       |
| 36622_at   | 1.48 | 0.40 | 0.65 | Cluster Incl. AI989422:ws25a09.x1 Homo sapiens cDNA, 3 end /clone=IMAGE-2498200 /clone_end=3 /gb=AI989422 /gi=5836345 /ug=Hs.75431 /len=785                     |
| 39452_s_at | 0.25 | 0.40 | 0.45 | Cluster Incl. AJ005694:Homo sapiens mRNA for short form of beta II spectrin, partial /cds=(0,248) /gb=AJ005694 /gi=3097075 /ug=Hs.166202 /len=294               |
| 35295_g_at | 1.03 | 0.41 | 0.64 | Cluster Incl. M25077:Human SS-A/Ro ribonucleoprotein autoantigen 60 kd subunit mRNA, complete cds /cds=(184,1761) /gb=M25077 /gi=387656 /ug=Hs.554 /len=959     |
| 41091_at   | 0.54 | 0.41 | 0.27 | Cluster Incl. U05237:Human fetal Alz-50-reactive clone 1 (FAC1) mRNA, complete cds /cds=(73,2505) /gb=U05237 /gi=1276427 /ug=Hs.99872 /len=2673                 |
| 2057_g_at  | 0.37 | 0.42 | 0.36 | M34641 /FEATURE= /DEFINITION=HUMFGF1A Human fibroblast growth factor (FGF) receptor-1 mRNA, complete cds                                                        |
| 34886_at   | 0.88 | 0.42 | 0.99 | Cluster Incl. L02320:Human radixin mRNA, complete cds /cds=(30,1781) /gb=L02320 /gi=307365 /ug=Hs.5100 /len=2022                                                |
| 40114_at   | 0.77 | 0.43 | 0.38 | Cluster Incl. J00077:Human alpha-fetoprotein (AFP) mRNA, complete cds /cds=(47,1876) /gb=J00077 /gi=4008148 /ug=Hs.155421 /len=2032                             |
| 40954_at   | 1.38 | 0.44 | 0.36 | Cluster Incl. H94881:yu57f07.s1 Homo sapiens cDNA, 3 end /clone=IMAGE-230245 /clone_end=3 /gb=H94881 /gi=1102514 /ug=Hs.19520 /len=480                          |
| 39545_at   | 0.44 | 0.44 | 0.25 | Cluster Incl. U22398:Human Cdk-inhibitor p57KIP2 (KIP2) mRNA, complete cds /cds=(260,1210) /gb=U22398 /gi=790247 /ug=Hs.106070 /len=1511                        |
| 41713_at   | 0.49 | 0.44 | 0.47 | Cluster Incl. U09848:Human zinc finger protein (ZNF139) mRNA, partial cds /cds=(0,977) /gb=U09848 /gi=495567 /ug=Hs.132390 /len=3505                            |
| 38765_at   | 0.98 | 0.44 | 0.54 | Cluster Incl. AB028449:Homo sapiens mRNA for Helicase-MOI, complete cds /cds=(182,5956) /gb=AB028449 /gi=5019619 /ug=Hs.87889 /len=7037                         |
| 1787_at    | 0.38 | 0.44 | 0.18 | U22398 /FEATURE= /DEFINITION=HSU22398 Human Cdk-inhibitor p57KIP2 (KIP2) mRNA, complete cds                                                                     |
| 34031_i_at | 0.67 | 0.44 | 0.44 | Cluster Incl. U90268:Human Krit1 mRNA, complete cds /cds=(25,1614) /gb=U90268 /gi=2149601 /ug=Hs.93810 /len=1986                                                |
| 37951_at   | 0.87 | 0.44 | 0.61 | Cluster Incl. AF035119:Homo sapiens deleted in liver cancer-1 (DLC-1) mRNA, complete cds /cds=(324,3599) /gb=AF035119 /gi=2654197 /ug=Hs.8700 /len=3819         |
| 31843_at   | 0.26 | 0.45 | 0.28 | Cluster Incl. AB020639:Homo sapiens mRNA for KIAA0832 protein, complete cds /cds=(154,1530) /gb=AB020639 /gi=4240152 /ug=Hs.151017 /len=5216                    |
| 41126_at   | 0.89 | 0.45 | 0.86 | Cluster Incl. AA978353:qk40b07.s1 Homo sapiens cDNA, 3 end /clone=IMAGE-1588789 /clone_end=3 /gb=AA978353 /gi=3153962 /ug=Hs.174203 /len=545                    |
| 34666_at   | 0.49 | 0.45 | 0.40 | Cluster Incl. X07834:Human mRNA for manganese superoxide dismutase (EC 1.15.1.1) /cds=(4,672) /gb=X07834 /gi=36517 /ug=Hs.233578 /len=1026                      |
| 34202_at   | 0.59 | 0.45 | 0.44 | Cluster Incl. AL050071:Homo sapiens mRNA; cDNA DKFZp566B0846 (from clone DKFZp566B0846) /cds=(0,1225) /gb=AL050071 /gi=4884302 /ug=Hs.21201 /len=1225           |
| 40367_at   | 0.81 | 0.45 | 0.55 | Cluster Incl. M22489:Human bone morphogenetic protein 2A (BMP-2A) mRNA /cds=(323,1513) /gb=M22489 /gi=179501 /ug=Hs.73853 /len=1547                             |
| 34022_at   | 0.32 | 0.46 | 0.48 | Cluster Incl. M36821:Human cytokine (GRO-gamma) mRNA, complete cds /cds=(77,397) /gb=M36821 /gi=183632 /ug=Hs.89690 /len=1064                                   |
| 34818_at   | 0.57 | 0.46 | 0.50 | Cluster Incl. X96381:H.sapiens erm gene, exon 2,3,4,5 (and joined CDS) /cds=(223,1755) /gb=X96381 /gi=1418781 /ug=Hs.43697 /len=4071                            |
| 36744_at   | 1.16 | 0.46 | 0.93 | Cluster Incl. S58544:75 kda infertility-related sperm protein [human, testis, mRNA Partial, 2427 nt] /cds=(1,1587) /gb=S58544 /gi=299702 /ug=Hs.62608 /len=2413 |
| 40853_at   | 0.17 | 0.46 | 0.12 | Cluster Incl. AI478147:tm34f06.x1 Homo sapiens cDNA, 3 end /clone=IMAGE-2160035 /clone_end=3 /gb=AI478147 /gi=4371373 /ug=Hs.173540 /len=637                    |
| 159_at     | 0.61 | 0.46 | 0.58 | U43142 /FEATURE= /DEFINITION=HSU43142 Human vascular endothelial growth factor related protein VRP mRNA, complete cds                                           |
| 37234_at   | 0.55 | 0.46 | 0.22 | Cluster Incl. K02566:Human alpha-2-thiol proteinase inhibitor mRNA, complete coding sequence /cds=(49,1332) /gb=K02566 /gi=177889 /ug=Hs.77741 /len=1493        |
| 40463_at   | 0.85 | 0.47 | 0.49 | Cluster Incl. U70322:Human transportin (TRN) mRNA, complete cds /cds=(93,2765) /gb=U70322 /gi=1613833 /ug=Hs.168075 /len=3039                                   |
| 37188_at   | 0.64 | 0.47 | 0.55 | Cluster Incl. X92720:H.sapiens mRNA for phosphoenolpyruvate carboxykinase /cds=(66,1988) /gb=X92720 /gi=1403049 /ug=Hs.75812 /len=2147                          |
| 33849_at   | 1.26 | 0.47 | 1.13 | Cluster Incl. U02020:Human pre-B cell enhancing factor (PBEF) mRNA, complete cds /cds=(27,1502) /gb=U02020 /gi=404012 /ug=Hs.239138 /len=2376                   |
| 36636_at   | 1.03 | 0.47 | 0.80 | Cluster Incl. M12267:Human ornithine aminotransferase mRNA, complete cds /cds=(54,1373) /gb=M12267 /gi=189328 /ug=Hs.75485 /len=2013                            |
| 37235_g_at | 0.55 | 0.47 | 0.28 | Cluster Incl. K02566:Human alpha-2-thiol proteinase inhibitor mRNA, complete coding sequence /cds=(49,1332) /gb=K02566 /gi=177889 /ug=Hs.77741 /len=1493        |
| 41124_r_at | 1.00 | 0.47 | 0.58 | Cluster Incl. L35594:Human autotaxin mRNA, complete cds /cds=(49,2796) /gb=L35594 /gi=537905 /ug=Hs.174185 /len=3231                                            |
| 41429_at   | 0.56 | 0.48 | 0.48 | Cluster Incl. M65254:Protein phosphatase 2A 65 kDa regulatory subunit-beta mRNA, complete cds /cds=(0,1727) /gb=M65254 /gi=189429 /ug=Hs.108705 /len=22:1727    |
| 1013_at    | 0.94 | 0.48 | 0.84 | U59913 /FEATURE= /DEFINITION=HSU59913 Human chromosome 5 Mad homolog Smad5 mRNA, complete cds                                                                   |
| 32531_at   | 0.75 | 0.48 | 0.67 | Cluster Incl. X52947:Human mRNA for cardiac gap junction protein /cds=(157,1305) /gb=X52947 /gi=29916 /ug=Hs.74471 /len=3038                                    |
| 404_at     | 0.39 | 0.48 | 0.35 | X52425 /FEATURE=mRNA /DEFINITION=HSIL4R Human IL-4-R mRNA for the interleukin 4 receptor                                                                        |



|            |      |      |      |                                                                                                                                                             |
|------------|------|------|------|-------------------------------------------------------------------------------------------------------------------------------------------------------------|
| 34354_at   | 0.76 | 0.48 | 0.63 | Cluster Incl. M80634:Human keratinocyte growth factor receptor mRNA, complete cds /cds=(418,2886) /gb=M80634 /gi=186740 /ug=Hs.31989 /len=3106              |
| 38545_at   | 2.48 | 0.48 | 1.07 | Cluster Incl. M31682:Human testicular inhibin beta-B-subunit mRNA, 3 end /cds=(0,1162) /gb=M31682 /gi=186422 /ug=Hs.1735 /len=2689                          |
| 38420_at   | 0.69 | 0.49 | 0.43 | Cluster Incl. Y14690:Homo sapiens mRNA for procollagen alpha 2(V) /cds=(138,4628) /gb=Y14690 /gi=2370201 /ug=Hs.82985 /len=4629                             |
| 41123_s_at | 1.06 | 0.49 | 0.59 | Cluster Incl. L35594:Human autotaxin mRNA, complete cds /cds=(49,2796) /gb=L35594 /gi=537905 /ug=Hs.174185 /len=3231                                        |
| 350_at     | 0.88 | 0.49 | 0.80 | D28118 /FEATURE= /DEFINITION=HUMDB1 Human mRNA for DB1, complete cds                                                                                        |
| 33399_at   | 0.52 | 0.49 | 0.59 | Cluster Incl. AA142942:z143c04.s1 Homo sapiens cDNA, 3 end /clone=IMAGE-504678 /clone_end=3 /gb=AA142942 /gi=1712320 /ug=Hs.227146 /len=604                 |
| 39417_at   | 1.01 | 0.49 | 0.60 | Cluster Incl. AB028951:Homo sapiens mRNA for KIAA1028 protein, partial cds /cds=(0,1127) /gb=AB028951 /gi=5689392 /ug=Hs.129836 /len=5685                   |
| 33377_at   | 0.74 | 0.49 | 0.47 | Cluster Incl. X03168:Human mRNA for S-protein /cds=(61,1497) /gb=X03168 /gi=36574 /ug=Hs.2257 /len=1582                                                     |
| 40899_at   | 0.77 | 0.49 | 0.50 | Cluster Incl. Y00503:Human mRNA for keratin 19 /cds=(32,1234) /gb=Y00503 /gi=34038 /ug=Hs.182265 /len=1360                                                  |
| 40754_at   | 0.50 | 0.49 | 0.52 | Cluster Incl. Z30093:H.sapiens mRNA for basic transcription factor 2, 34 kD subunit /cds=(0,911) /gb=Z30093 /gi=1039317 /ug=Hs.90304 /len=912               |
| 32252_at   | 0.60 | 0.49 | 0.36 | Cluster Incl. D00096:Homo sapiens mRNA for prealbumin, complete cds /cds=(26,469) /gb=D00096 /gi=2951758 /ug=Hs.194366 /len=615                             |
| 479_at     | 1.13 | 0.49 | 0.89 | U53446 /FEATURE= /DEFINITION=HSU53446 Human mitogen-responsive phosphoprotein DOC-2 mRNA, complete cds                                                      |
| 33753_at   | 0.50 | 0.50 | 0.59 | Cluster Incl. AB014566:Homo sapiens mRNA for KIAA0666 protein, partial cds /cds=(0,3259) /gb=AB014566 /gi=3327145 /ug=Hs.197751 /len=4153                   |
| 32249_at   | 0.85 | 0.50 | 0.51 | Cluster Incl. M65292:Human factor H homologue mRNA, complete cds /cds=(77,1069) /gb=M65292 /gi=183762 /ug=Hs.194272 /len=1266                               |
| 33193_at   | 0.62 | 0.50 | 0.55 | Cluster Incl. AW052084:wy86f07.x1 Homo sapiens cDNA, 3 end /clone=IMAGE-2555461 /clone_end=3 /gb=AW052084 /gi=5914443 /ug=Hs.9398 /len=586                  |
| 38403_at   | 0.88 | 0.51 | 0.65 | Cluster Incl. X77196:H.sapiens mRNA for lysosome-associated membrane protein-2 /cds=(137,1369) /gb=X77196 /gi=704462 /ug=Hs.8262 /len=1868                  |
| 40140_at   | 0.66 | 0.51 | 0.62 | Cluster Incl. D76444:Homo sapiens hkf-1 mRNA, complete cds /cds=(922,2979) /gb=D76444 /gi=1945614 /ug=Hs.155968 /len=3423                                   |
| 37816_at   | 0.87 | 0.51 | 0.57 | Cluster Incl. M57729:Human complement component C5 mRNA, complete cds /cds=(12,5042) /gb=M57729 /gi=179982 /ug=Hs.1281 /len=5444                            |
| 33802_at   | 6.03 | 0.51 | 3.85 | Cluster Incl. Z82244:bK286B10.2 (Heme Oxygenase 1 (HO-1, EC 1.14.99.3)) /cds=(82,948) /gb=Z82244 /gi=3191962 /ug=Hs.202833 /len=1558                        |
| 38825_at   | 2.95 | 0.52 | 5.91 | Cluster Incl. M64982:Human fibrinogen alpha chain gene, complete mRNAs /cds=(0,2600) /gb=M64982 /gi=458553 /ug=Hs.90765 /len=2601                           |
| 34091_s_at | 0.75 | 0.52 | 0.47 | Cluster Incl. Z19554:H.sapiens vimentin gene /cds=(122,1522) /gb=Z19554 /gi=37851 /ug=Hs.2064 /len=1851                                                     |
| 903_at     | 0.52 | 0.52 | 0.40 | L42373 /FEATURE=mRNA /DEFINITION=HUMPP2A Homo sapiens phosphatase 2A B56-alpha (PP2A) mRNA, complete cds                                                    |
| 38916_at   | 0.22 | 0.52 | 0.32 | Cluster Incl. U46023:Human Xq28 mRNA, complete cds /cds=(283,2388) /gb=U46023 /gi=1378037 /ug=Hs.20136 /len=4599                                            |
| 37604_at   | 1.26 | 0.52 | 0.99 | Cluster Incl. U44111:Human histamine N-methyltransferase (HNMT) gene /cds=(252,1130) /gb=U44111 /gi=1236890 /ug=Hs.81182 /len=1667                          |
| 36671_at   | 0.74 | 0.52 | 0.81 | Cluster Incl. M27396:Human asparagine synthetase mRNA, complete cds /cds=(178,1863) /gb=M27396 /gi=179099 /ug=Hs.75692 /len=1992                            |
| 41544_at   | 0.44 | 0.53 | 0.57 | Cluster Incl. AF059617:Homo sapiens serum-inducible kinase mRNA, complete cds /cds=(300,2357) /gb=AF059617 /gi=3075508 /ug=Hs.3838 /len=2957                |
| 36800_at   | 0.41 | 0.53 | 0.35 | Cluster Incl. M99564:Homo sapiens (clone DN10mel) P protein mRNA, complete cds /cds=(52,2568) /gb=M99564 /gi=190284 /ug=Hs.82027 /len=3070                  |
| 33218_at   | 1.86 | 0.53 | 0.85 | Cluster Incl. M11730:Human tyrosine kinase-type receptor (HER2) mRNA, complete cds /cds=(150,3917) /gb=M11730 /gi=183986 /ug=Hs.173664 /len=4530            |
| 37338_at   | 0.87 | 0.53 | 0.75 | Cluster Incl. D61391:Human mRNA for phosphoribosylpyrophosphate synthetase-associated protein 39, complete cds /cds=(49,1119) /gb=D61391 /gi=1381026 /ug=   |
| 37827_r_at | 0.74 | 0.54 | 0.87 | Cluster Incl. AJ237839:Homo sapiens mRNA for hypothetical protein /cds=(85,6981) /gb=AJ237839 /gi=4741548 /ug=Hs.129781 /len=7288                           |
| 39382_at   | 0.68 | 0.54 | 0.43 | Cluster Incl. AB011089:Homo sapiens mRNA for KIAA0517 protein, partial cds /cds=(0,2380) /gb=AB011089 /gi=3043557 /ug=Hs.12372 /len=6740                    |
| 36262_at   | 1.22 | 0.54 | 0.82 | Cluster Incl. Z12173:H.sapiens GNS mRNA encoding glucosamine-6-sulphatase /cds=(87,1745) /gb=Z12173 /gi=31866 /ug=Hs.2703 /len=2379                         |
| 41743_i_at | 1.03 | 0.54 | 0.72 | Cluster Incl. AF061034:Homo sapiens FIP2 alternatively translated mRNA, complete cds /cds=UNKNOWN /gb=AF061034 /gi=3127082 /ug=Hs.182236 /len=2116          |
| 33701_at   | 0.55 | 0.54 | 0.39 | Cluster Incl. U49897:Homo sapiens phenylalanine hydroxylase (PAH) mRNA, complete cds /cds=(472,1830) /gb=U49897 /gi=2462721 /ug=Hs.1870 /len=2680           |
| 40385_at   | 0.46 | 0.54 | 0.48 | Cluster Incl. U64197:Homo sapiens chemokine exodus-1 mRNA, complete cds /cds=(42,329) /gb=U64197 /gi=1778716 /ug=Hs.75498 /len=821                          |
| 34853_at   | 1.01 | 0.55 | 0.75 | Cluster Incl. AB007865:Homo sapiens KIAA0405 mRNA, complete cds /cds=(1124,3106) /gb=AB007865 /gi=2662090 /ug=Hs.48998 /len=7527                            |
| 36780_at   | 0.79 | 0.55 | 0.50 | Cluster Incl. M25915:Human complement cytolysis inhibitor (CLI) mRNA, complete cds /cds=(198,1544) /gb=M25915 /gi=180619 /ug=Hs.75106 /len=1651             |
| 34367_at   | 1.06 | 0.55 | 0.78 | Cluster Incl. AF006043:Homo sapiens 3-phosphoglycerate dehydrogenase mRNA, complete cds /cds=(692,2293) /gb=AF006043 /gi=2674061 /ug=Hs.3343 /len=2689      |
| 34162_at   | 1.19 | 0.55 | 0.76 | Cluster Incl. D84111:Homo sapiens mRNA for RBP-MS/type 5, partial cds /cds=(0,297) /gb=D84111 /gi=1669554 /ug=Hs.234754 /len=778                            |
| 491_at     | 0.50 | 0.55 | 0.54 | U46116 /FEATURE=mRNA /DEFINITION=HSPTPRG28 Human receptor tyrosine phosphatase gamma (PTPRG) gene, exon 30 and complete cds                                 |
| 37319_at   | 0.43 | 0.55 | 0.23 | Cluster Incl. M35878:Human insulin-like growth factor-binding protein-3 gene, complete cds, clone HL1006d /cds=(132,1007) /gb=M35878 /gi=184522 /ug=Hs.7732 |
| 1530_g_at  | 0.65 | 0.56 | 0.60 | U50534 /FEATURE= /DEFINITION=HSU50534 Human BRCA2 region, mRNA sequence CG003                                                                               |
| 38506_at   | 1.28 | 0.56 | 0.93 | Cluster Incl. X58840:Human mRNA for variant hepatic nuclear factor 1 (vHNF1) /cds=(194,1867) /gb=X58840 /gi=414047 /ug=Hs.169853 /len=2816                  |

|            |      |      |      |                                                                                                                                                            |
|------------|------|------|------|------------------------------------------------------------------------------------------------------------------------------------------------------------|
| 38694_at   | 0.90 | 0.56 | 0.98 | Cluster Incl. AB018281:Homo sapiens mRNA for KIAA0738 protein, complete cds /cds=(133,2898) /gb=AB018281 /gi=3882196 /ug=Hs.107479 /len=4076               |
| 40394_at   | 0.53 | 0.56 | 0.46 | Cluster Incl. L17128:Homo sapiens (clone H4/H16) gamma-glutamic carboxylase mRNA, complete cds /cds=(155,2431) /gb=L17128 /gi=1220308 /ug=Hs.77719 /le     |
| 1842_at    | 0.76 | 0.56 | 0.48 | Oncogene TIs/Chop, Fusion Activated                                                                                                                        |
| 31897_at   | 0.61 | 0.56 | 0.64 | Cluster Incl. U53445:Human ovarian cancer downregulated myosin heavy chain homolog (Doc1) mRNA, complete cds /cds=(134,2392) /gb=U53445 /gi=1297318 /l     |
| 37375_at   | 0.72 | 0.56 | 0.60 | Cluster Incl. AB014538:Homo sapiens mRNA for KIAA0638 protein, partial cds /cds=(0,3706) /gb=AB014538 /gi=3327089 /ug=Hs.77864 /len=4915                   |
| 38631_at   | 0.35 | 0.57 | 0.34 | Cluster Incl. M92357:Homo sapiens B94 protein mRNA, complete cds /cds=(131,2095) /gb=M92357 /gi=306463 /ug=Hs.101382 /len=4180                             |
| 39420_at   | 0.78 | 0.57 | 0.49 | Cluster Incl. S62138:TLS/CHOP=hybrid gene {translocation breakpoint} [human, myxoid liposarcomas cells, mRNA Mutant, 1682 nt] /cds=(78,1466) /gb=S62138 /g |
| 40841_at   | 0.42 | 0.57 | 0.44 | Cluster Incl. AF049910:Homo sapiens TACC1 (TACC1) mRNA, complete cds /cds=(320,2737) /gb=AF049910 /gi=3435156 /ug=Hs.173159 /len=7735                      |
| 39134_at   | 0.65 | 0.57 | 0.36 | Cluster Incl. AJ006973:Homo sapiens mRNA for TOM1 protein /cds=(61,1539) /gb=AJ006973 /gi=3319952 /ug=Hs.9482 /len=2310                                    |
| 1723_g_at  | 0.65 | 0.57 | 0.56 | S61953 /FEATURE= /DEFINITION=S61953 c-erbB3=receptor tyrosine kinase {alternatively spliced} [human, gastric cancer cell line MNK45, mRNA, 1042 nt]        |
| 38822_at   | 0.72 | 0.57 | 0.71 | Cluster Incl. AB011420:Homo sapiens mRNA for DRAK1, complete cds /cds=(117,1361) /gb=AB011420 /gi=3834353 /ug=Hs.9075 /len=2641                            |
| 32628_at   | 0.93 | 0.57 | 0.58 | Cluster Incl. D28118:Human mRNA for DB1, complete cds /cds=(41,1591) /gb=D28118 /gi=529640 /ug=Hs.167558 /len=2306                                         |
| 41742_s_at | 0.98 | 0.57 | 0.70 | Cluster Incl. AF061034:Homo sapiens FIP2 alternatively translated mRNA, complete cds /cds=UNKNOWN /gb=AF061034 /gi=3127082 /ug=Hs.182236 /len=2116         |
| 41424_at   | 0.54 | 0.57 | 0.32 | Cluster Incl. L48516:Homo sapiens paraoxonase 3 (PON3) mRNA, 3 end of cds /cds=(0,1025) /gb=L48516 /gi=1333633 /ug=Hs.107966 /len=1038                     |
| 1452_at    | 0.53 | 0.57 | 0.52 | U24576 /FEATURE= /DEFINITION=U24576 Homo sapiens breast tumor autoantigen (LMO4) mRNA, complete cds                                                        |
| 36690_at   | 0.94 | 0.57 | 0.86 | Cluster Incl. M10901:Human glucocorticoid receptor alpha mRNA, complete cds /cds=(132,2465) /gb=M10901 /gi=183032 /ug=Hs.75772 /len=4788                   |
| 37544_at   | 1.10 | 0.58 | 0.74 | Cluster Incl. X64318:H.sapiens E4BP4 gene /cds=(213,1601) /gb=X64318 /gi=30955 /ug=Hs.79334 /len=1904                                                      |
| 36584_at   | 0.87 | 0.58 | 0.50 | Cluster Incl. X07173:Human mRNA for second protein of inter-alpha-trypsin inhibitor complex /cds=(63,2903) /gb=X07173 /gi=33984 /ug=Hs.75285 /len=3089     |
| 41419_at   | 0.96 | 0.58 | 1.20 | Cluster Incl. AL080142:Homo sapiens mRNA; cDNA DKFZp434N103 (from clone DKFZp434N103) /cds=UNKNOWN /gb=AL080142 /gi=5262589 /ug=Hs.107056 /                |
| 35486_at   | 0.79 | 0.59 | 0.67 | Cluster Incl. AF087693:Homo sapiens vcl1 mRNA, complete cds /cds=(162,863) /gb=AF087693 /gi=3687898 /ug=Hs.178215 /len=1176                                |
| 31886_at   | 0.70 | 0.59 | 0.52 | Cluster Incl. X55740:Human placental cDNA coding for 5nucleotidase (EC 3.1.3.5) /cds=(49,1773) /gb=X55740 /gi=23896 /ug=Hs.153952 /len=3547                |
| 38049_g_at | 1.02 | 0.59 | 0.78 | Cluster Incl. D84110:Homo sapiens mRNA for RBP-MS/type 4, complete cds /cds=(566,1156) /gb=D84110 /gi=1669552 /ug=Hs.80248 /len=1594                       |
| 39733_at   | 0.96 | 0.59 | 0.77 | Cluster Incl. AF055001:Homo sapiens clone 24560 unknown mRNA, complete cds /cds=(95,1270) /gb=AF055001 /gi=3005718 /ug=Hs.146393 /len=1862                 |
| 31829_r_at | 0.73 | 0.59 | 1.39 | Cluster Incl. AF027515:Homo sapiens trans-golgi network glycoprotein 48 (TGN) mRNA, complete cds /cds=(62,1423) /gb=AF027515 /gi=2772909 /ug=Hs.14894 /    |
| 1529_at    | 0.73 | 0.59 | 0.68 | U50534 /FEATURE= /DEFINITION=HSU50534 Human BRCA2 region, mRNA sequence CG003                                                                              |
| 40876_at   | 0.63 | 0.59 | 0.59 | Cluster Incl. U31525:Human glycogenin mRNA, complete cds /cds=(127,1128) /gb=U31525 /gi=976399 /ug=Hs.174071 /len=1827                                     |
| 32043_at   | 2.25 | 0.59 | 1.99 | Cluster Incl. AF098462:Homo sapiens stanniocalcin-related protein mRNA, complete cds /cds=(134,1042) /gb=AF098462 /gi=4050037 /ug=Hs.155223 /len=2380      |
| 34411_at   | 0.91 | 0.59 | 0.75 | Cluster Incl. Y10387:H.sapiens mRNA for PAPS synthetase /cds=(36,1910) /gb=Y10387 /gi=2673861 /ug=Hs.3833 /len=2493                                        |
| 40607_at   | 0.98 | 0.60 | 0.82 | Cluster Incl. U97105:Homo sapiens N2A3 mRNA, complete cds /cds=(1336,3054) /gb=U97105 /gi=2967518 /ug=Hs.173381 /len=5407                                  |
| 39298_at   | 0.70 | 0.60 | 0.73 | Cluster Incl. AB022918:Homo sapiens mRNA for alpha2,3-sialyltransferase ST3Gal VI, complete cds /cds=(258,1253) /gb=AB022918 /gi=4827246 /ug=Hs.239547     |
| 34890_at   | 1.27 | 0.60 | 0.77 | Cluster Incl. L09235:Human vacuolar ATPase (isoform VA68) mRNA, complete cds /cds=(15,1868) /gb=L09235 /gi=291867 /ug=Hs.5119 /len=1924                    |
| 40091_at   | 1.06 | 0.60 | 0.88 | Cluster Incl. U00115:Human zinc-finger protein (bcl-6) mRNA, complete cds /cds=(327,2447) /gb=U00115 /gi=392426 /ug=Hs.155024 /len=3524                    |
| 41778_at   | 0.79 | 0.60 | 0.81 | Cluster Incl. U53347:Human neutral amino acid transporter B mRNA, complete cds /cds=(619,2244) /gb=U53347 /gi=1478280 /ug=Hs.183556 /len=2867              |
| 38993_r_at | 0.75 | 0.60 | 0.85 | Cluster Incl. W27522:32a12 Homo sapiens cDNA /gb=W27522 /gi=1307326 /ug=Hs.110771 /len=968                                                                 |
| 2089_s_at  | 0.82 | 0.60 | 0.53 | H06628 /FEATURE= /DEFINITION=H06628 y182g03.r1 Soares infant brain 1NIB Homo sapiens cDNA clone IMAGE:44708 5 similar to gb:M34309 ERBB-3 REC              |
| 33787_at   | 1.38 | 0.60 | 1.08 | Cluster Incl. AB011109:Homo sapiens mRNA for KIAA0537 protein, complete cds /cds=(1380,3365) /gb=AB011109 /gi=3043597 /ug=Hs.200598 /len=6828              |
| 32034_at   | 0.83 | 0.60 | 0.59 | Cluster Incl. AF041259:Homo sapiens breast cancer putative transcription factor (ZABC1) mRNA, complete cds /cds=(271,3417) /gb=AF041259 /gi=3335396 /ug=H  |
| 35414_s_at | 0.70 | 0.60 | 0.62 | Cluster Incl. U77914:Human soluble protein Jagged mRNA, partial cds /cds=(0,791) /gb=U77914 /gi=1684889 /ug=Hs.166065 /len=1589                            |
| 36962_at   | 0.91 | 0.60 | 0.65 | Cluster Incl. U24105:Homo sapiens coatomer protein (COPA) mRNA, complete cds /cds=(466,4140) /gb=U24105 /gi=1638873 /ug=Hs.75887 /len=4692                 |
| 41772_at   | 0.46 | 0.60 | 0.49 | Cluster Incl. M68840:Human monoamine oxidase A (MAOA) mRNA, complete cds /cds=(73,1656) /gb=M68840 /gi=187352 /ug=Hs.183109 /len=1949                      |
| 37001_at   | 1.09 | 0.60 | 0.64 | Cluster Incl. M23254:Human Ca2-activated neutral protease large subunit (CANP) mRNA, complete cds /cds=(130,2232) /gb=M23254 /gi=511636 /ug=Hs.76288 /l    |
| 38013_at   | 1.53 | 0.60 | 0.89 | Cluster Incl. AL096842:Homo sapiens mRNA; cDNA DKFZp586D1519 (from clone DKFZp586D1519) /cds=(0,1517) /gb=AL096842 /gi=5524930 /ug=Hs.7946 /len=           |
| 38394_at   | 0.51 | 0.61 | 0.65 | Cluster Incl. D42047:Human mRNA for KIAA0089 gene, partial cds /cds=(0,1236) /gb=D42047 /gi=577306 /ug=Hs.82432 /len=4043                                  |



|            |      |      |      |                                                                                                                                                            |
|------------|------|------|------|------------------------------------------------------------------------------------------------------------------------------------------------------------|
| 40936_at   | 0.95 | 0.61 | 1.34 | Cluster Incl. AI651806:wb55f10.x1 Homo sapiens cDNA, 3 end /clone=IMAGE-2309611 /clone_end=3 /gb=AI651806 /gi=4735797 /ug=Hs.19280 /len=609                |
| 37755_at   | 0.78 | 0.61 | 0.58 | Cluster Incl. AB023169:Homo sapiens mRNA for KIAA0952 protein, complete cds /cds=(359,1927) /gb=AB023169 /gi=4589547 /ug=Hs.7935 /len=4856                 |
| 36635_at   | 0.74 | 0.61 | 0.73 | Cluster Incl. AB023173:Homo sapiens mRNA for KIAA0956 protein, partial cds /cds=(0,2020) /gb=AB023173 /gi=4589555 /ug=Hs.75478 /len=5542                   |
| 31872_at   | 1.01 | 0.61 | 0.89 | Cluster Incl. X79201:H.sapiens mRNA for SYT /cds=(3,1178) /gb=X79201 /gi=531105 /ug=Hs.153221 /len=2919                                                    |
| 37058_at   | 1.02 | 0.61 | 0.67 | Cluster Incl. Y00317:Human mRNA for liver microsomal UDP-glucuronosyltransferase (UDPGT) /cds=(37,1623) /gb=Y00317 /gi=37588 /ug=Hs.89691 /len=2093        |
| 31830_s_at | 0.83 | 0.61 | 0.46 | Cluster Incl. Y13492:Homo sapiens mRNA for smoothelin-B /cds=(219,2972) /gb=Y13492 /gi=4884416 /ug=Hs.149098 /len=3130                                     |
| 41710_at   | 1.38 | 0.61 | 0.86 | Cluster Incl. AL079277:Homo sapiens mRNA full length insert cDNA clone EUROIMAGE 293605 /cds=(0,806) /gb=AL079277 /gi=5102581 /ug=Hs.12969 /len=141        |
| 1272_at    | 1.33 | 0.61 | 1.02 | L19161 /FEATURE= /DEFINITION=HUMIEF2G Human translation initiation factor eIF-2 gamma subunit mRNA, complete cds                                           |
| 34986_at   | 0.71 | 0.62 | 0.67 | Cluster Incl. AF030455:Homo sapiens epithelial V-like antigen precursor (EVA) mRNA, complete cds /cds=(119,766) /gb=AF030455 /gi=3169829 /ug=Hs.151602 /le |
| 38354_at   | 0.62 | 0.62 | 0.58 | Cluster Incl. X52560:Human gene for nuclear factor NF-IL6 /cds=(0,1037) /gb=X52560 /gi=35035 /ug=Hs.99029 /len=1038                                        |
| 40964_at   | 2.02 | 0.62 | 1.73 | Cluster Incl. Z46376:H.sapiens HK2 mRNA for hexokinase II /cds=(1490,4243) /gb=Z46376 /gi=587201 /ug=Hs.198427 /len=5292                                   |
| 1747_at    | 0.64 | 0.62 | 0.62 | AD000092 /FEATURE=cds#2 /DEFINITION=CH19HHR23 Homo sapiens DNA from chromosome 19p13.2 cosmids R31240, R30272 and R28549 containing the E                  |
| 32626_at   | 1.40 | 0.62 | 0.84 | Cluster Incl. M90516:Human glutamine-fructose-6-phosphate amidotransferase (GFAT) mRNA, complete cds /cds=(122,2167) /gb=M90516 /gi=183081 /ug=Hs.167      |
| 343_s_at   | 0.63 | 0.62 | 0.41 | D12485 /FEATURE=cds#1 /DEFINITION=HUMNPP Human mRNA for nucleotide pyrophosphatase, complete cds                                                           |
| 1113_at    | 0.72 | 0.62 | 0.74 | M22489 /FEATURE= /DEFINITION=HUMBMP2A Human bone morphogenetic protein 2A (BMP-2A) mRNA                                                                    |
| 32787_at   | 0.69 | 0.62 | 0.64 | Cluster Incl. M34309:Human epidermal growth factor receptor (HER3) mRNA, complete cds /cds=(198,4226) /gb=M34309 /gi=183990 /ug=Hs.199067 /len=4975        |
| 36091_at   | 0.59 | 0.62 | 0.49 | Cluster Incl. AF051323:Homo sapiens Src-associated adaptor protein (SAPS) mRNA, complete cds /cds=(172,1251) /gb=AF051323 /gi=4091777 /ug=Hs.52644 /le     |
| 1585_at    | 0.73 | 0.62 | 0.46 | M34309 /FEATURE= /DEFINITION=HUMHER3A Human epidermal growth factor receptor (HER3) mRNA, complete cds                                                     |
| 35576_f_at | 0.61 | 0.62 | 0.55 | Cluster Incl. AL009179:dJ97D16.4 (Histone H2B) /cds=(25,405) /gb=AL009179 /gi=3217024 /ug=Hs.137594 /len=488                                               |
| 34776_at   | 0.52 | 0.62 | 0.49 | Cluster Incl. W27541:32c12 Homo sapiens cDNA /gb=W27541 /gi=1307345 /ug=Hs.3903 /len=982                                                                   |
| 342_at     | 0.51 | 0.62 | 0.42 | D12485 /FEATURE= /DEFINITION=HUMNPP Human mRNA for nucleotide pyrophosphatase, complete cds                                                                |
| 39012_g_at | 0.59 | 0.63 | 0.57 | Cluster Incl. X99906:Homo sapiens mRNA for alpha endosulfine /cds=(125,490) /gb=X99906 /gi=2764973 /ug=Hs.111680 /len=749                                  |
| 608_at     | 0.74 | 0.63 | 0.43 | M12529 /FEATURE=mRNA /DEFINITION=HUMAPOE Human apolipoprotein E mRNA, complete cds                                                                         |
| 41466_s_at | 1.50 | 0.63 | 0.67 | Cluster Incl. L04282:Human CACCC box-binding protein mRNA, complete cds /cds=(390,1754) /gb=L04282 /gi=388318 /ug=Hs.112180 /len=2378                      |
| 33446_at   | 0.46 | 0.63 | 0.42 | Cluster Incl. W26407:29b8 Homo sapiens cDNA /gb=W26407 /gi=1307106 /ug=Hs.233806 /len=885                                                                  |
| 34797_at   | 0.65 | 0.63 | 0.60 | Cluster Incl. AF014402:Homo sapiens type-2 phosphatidic acid phosphatase alpha-1 (PAP2-a1) mRNA, complete cds /cds=(341,1195) /gb=AF014402 /gi=3123847     |
| 36423_at   | 0.67 | 0.63 | 0.61 | Cluster Incl. W47047:zc38g10.r1 Homo sapiens cDNA, 5 end /clone=IMAGE-324642 /clone_end=5 /gb=W47047 /gi=1331686 /ug=Hs.166194 /len=441                    |
| 40464_g_at | 0.78 | 0.63 | 0.53 | Cluster Incl. U70322:Human transportin (TRN) mRNA, complete cds /cds=(93,2765) /gb=U70322 /gi=1613833 /ug=Hs.168075 /len=3039                              |
| 40621_at   | 0.60 | 0.63 | 0.77 | Cluster Incl. U63809:Homo sapiens prostate apoptosis response protein par-4 mRNA, complete cds /cds=(238,1266) /gb=U63809 /gi=3282204 /ug=Hs.176090 /len   |
| 36175_s_at | 1.11 | 0.63 | 1.00 | Cluster Incl. AL023584:Human DNA sequence from clone 67K17 on chromosome 6q24.1-24.3. Contains the HIVP2 (Schnurri-2) gene for HIV type 1 Enhancer-bir     |
| 32854_at   | 0.67 | 0.63 | 0.61 | Cluster Incl. AB014596:Homo sapiens mRNA for KIAA0696 protein, partial cds /cds=(0,1653) /gb=AB014596 /gi=3327205 /ug=Hs.21229 /len=4230                   |
| 37152_at   | 0.73 | 0.63 | 0.61 | Cluster Incl. L07592:Human peroxisome proliferator activated receptor mRNA, complete cds /cds=(337,1662) /gb=L07592 /gi=190229 /ug=Hs.106415 /len=3301     |
| 39330_s_at | 0.93 | 0.63 | 0.61 | Cluster Incl. M95178:Human non-muscle alpha-actinin mRNA, complete cds /cds=(111,2789) /gb=M95178 /gi=178051 /ug=Hs.119000 /len=3081                       |
| 32179_s_at | 0.74 | 0.63 | 0.71 | Cluster Incl. Y09568:Homo sapiens mRNA for SNAP23B protein, complete CDS /cds=(0,476) /gb=Y09568 /gi=1924943 /ug=Hs.184376 /len=477                        |
| 32550_r_at | 0.72 | 0.63 | 0.48 | Cluster Incl. Y11525:H.sapiens mRNA for CCAAT/enhancer binding protein alpha /cds=(149,1222) /gb=Y11525 /gi=1877204 /ug=Hs.76171 /len=2526                 |
| 39764_at   | 1.01 | 0.63 | 1.06 | Cluster Incl. Z22534:H.sapiens ALK-2 mRNA /cds=(103,1632) /gb=Z22534 /gi=402184 /ug=Hs.150402 /len=2715                                                    |
| 41109_at   | 1.01 | 0.63 | 0.76 | Cluster Incl. M31452:Human proline-rich protein (PRP) mRNA, complete cds /cds=(138,1931) /gb=M31452 /gi=190501 /ug=Hs.1012 /len=2178                       |
| 33370_r_at | 0.56 | 0.63 | 0.71 | Cluster Incl. U60205:Human methyl sterol oxidase (ERG25) mRNA, complete cds /cds=(26,907) /gb=U60205 /gi=1408205 /ug=Hs.223018 /len=1751                   |
| 32587_at   | 0.56 | 0.63 | 0.57 | Cluster Incl. U07802:Human Tis11d gene, complete cds /cds=(291,1739) /gb=U07802 /gi=984508 /ug=Hs.78909 /len=3655                                          |
| 32819_at   | 0.66 | 0.63 | 0.54 | Cluster Incl. AJ223352:Homo sapiens mRNA for for histone H2B, clone pjG4-5-14 /cds=(16,396) /gb=AJ223352 /gi=3255996 /ug=Hs.20418 /len=793                 |
| 40139_at   | 0.61 | 0.63 | 0.61 | Cluster Incl. U88966:Human protein rapamycin associated protein (FRAP2) gene, complete cds /cds=(79,7725) /gb=U88966 /gi=3282238 /ug=Hs.155952 /len=867    |
| 41225_at   | 1.18 | 0.64 | 0.91 | Cluster Incl. AL049417:Homo sapiens mRNA; cDNA DKFp586O1919 (from clone DKFp586O1919) /cds=UNKNOWN /gb=AL049417 /gi=4500198 /ug=Hs.18104                   |
| 39696_at   | 0.83 | 0.64 | 0.68 | Cluster Incl. AB028974:Homo sapiens mRNA for KIAA1051 protein, partial cds /cds=(0,1029) /gb=AB028974 /gi=5689438 /ug=Hs.137476 /len=6188                  |

|            |      |      |      |                                                                                                                                                            |
|------------|------|------|------|------------------------------------------------------------------------------------------------------------------------------------------------------------|
| 32529_at   | 0.66 | 0.64 | 0.45 | Cluster Incl. X69910:H.sapiens p63 mRNA for transmembrane protein /cds=(84,1889) /gb=X69910 /gi=297407 /ug=Hs.74368 /len=2898                              |
| 33811_at   | 1.66 | 0.64 | 1.33 | Cluster Incl. AI761567:wg66a05.x1 Homo sapiens cDNA, 3 end /clone=IMAGE-2370032 /clone_end=3 /gb=AI761567 /gi=5177234 /ug=Hs.203955 /len=564               |
| 2056_at    | 0.61 | 0.64 | 0.56 | M34641 /FEATURE= /DEFINITION=HUMFGF1A Human fibroblast growth factor (FGF) receptor-1 mRNA, complete cds                                                   |
| 195_s_at   | 0.84 | 0.64 | 0.78 | U28014 /FEATURE= /DEFINITION=HSU28014 Human cysteine protease (ICRel-II) mRNA, complete cds                                                                |
| 38823_s_at | 0.91 | 0.64 | 0.65 | Cluster Incl. AI961743:wt66f12.x1 Homo sapiens cDNA, 3 end /clone=IMAGE-2512463 /clone_end=3 /gb=AI961743 /gi=5754456 /ug=Hs.9075 /len=694                 |
| 32078_at   | 0.67 | 0.64 | 0.73 | Cluster Incl. D42055:Human mRNA for KIAA0093 gene, partial cds /cds=(0,2784) /gb=D42055 /gi=577312 /ug=Hs.1565 /len=5749                                   |
| 38286_at   | 0.72 | 0.64 | 0.67 | Cluster Incl. AB028994:Homo sapiens mRNA for KIAA1071 protein, partial cds /cds=(0,1421) /gb=AB028994 /gi=5689478 /ug=Hs.9271 /len=5061                    |
| 115_at     | 0.67 | 0.64 | 0.86 | X14787 /FEATURE=cds /DEFINITION=HSTS Human mRNA for thrombospondin                                                                                         |
| 38519_at   | 0.52 | 0.64 | 0.33 | Cluster Incl. U68233:Human farnesol receptor HRR-1 (HRR-1) mRNA, complete cds /cds=(353,1771) /gb=U68233 /gi=1546083 /ug=Hs.171683 /len=2148               |
| 738_at     | 0.79 | 0.65 | 0.67 | D38524 /FEATURE= /DEFINITION=HUM5N Human mRNA for 5'-nucleotidase                                                                                          |
| 41770_at   | 0.62 | 0.65 | 0.60 | Cluster Incl. AA420624:nc61c12.r1 Homo sapiens cDNA /clone=IMAGE-745750 /gb=AA420624 /gi=2094502 /ug=Hs.183109 /len=533                                    |
| 1615_at    | 0.93 | 0.65 | 0.64 | Z23115 /FEATURE=cds /DEFINITION=HSBCLXL H.sapiens bcl-xL mRNA                                                                                              |
| 39306_at   | 0.79 | 0.65 | 0.72 | Cluster Incl. AF052514:Homo sapiens thymus specific serine peptidase mRNA, complete cds /cds=(12,1556) /gb=AF052514 /gi=3510662 /ug=Hs.239778 /len=269     |
| 35314_at   | 0.71 | 0.65 | 0.64 | Cluster Incl. D63880:Human mRNA for KIAA0159 gene, complete cds /cds=(799,5004) /gb=D63880 /gi=961451 /ug=Hs.5719 /len=5547                                |
| 37187_at   | 0.50 | 0.65 | 0.40 | Cluster Incl. M36820:Human cytokine (GRO-beta) mRNA, complete cds /cds=(74,397) /gb=M36820 /gi=183628 /ug=Hs.75765 /len=1110                               |
| 38676_at   | 0.67 | 0.65 | 0.83 | Cluster Incl. AA059408:z196e07.r1 Homo sapiens cDNA, 5 end /clone=IMAGE-512484 /clone_end=5 /gb=AA059408 /gi=1553311 /ug=Hs.106369 /len=688                |
| 37391_at   | 1.48 | 0.65 | 1.16 | Cluster Incl. X12451:Human mRNA for pro-cathepsin L (major excreted protein MEP) /cds=(288,1289) /gb=X12451 /gi=29714 /ug=Hs.78056 /len=1575               |
| 32164_at   | 0.70 | 0.65 | 0.62 | Cluster Incl. S79639:EXT1=putative tumour suppressor/hereditary multiple exostoses candidate gene [human, placenta, mRNA, 3183 nt] /cds=(651,2891) /gb=S79 |
| 35338_at   | 0.94 | 0.65 | 0.66 | Cluster Incl. X17094:Human fur mRNA for furin /cds=(216,2600) /gb=X17094 /gi=31477 /ug=Hs.59242 /len=4180                                                  |
| 160_at     | 0.65 | 0.66 | 0.59 | U43899 /FEATURE= /DEFINITION=HSU43899 Human signal transducing adaptor molecule STAM mRNA, complete cds                                                    |
| 1458_at    | 0.76 | 0.66 | 0.68 | M64572 /FEATURE= /DEFINITION=HUMCAP Human protein tyrosine phosphatase mRNA, complete cds                                                                  |
| 37374_at   | 1.20 | 0.66 | 0.73 | Cluster Incl. M82809:Human annexin IV (ANX4) mRNA, complete cds /cds=(73,1038) /gb=M82809 /gi=178698 /ug=Hs.77840 /len=1976                                |
| 39967_at   | 0.61 | 0.66 | 0.54 | Cluster Incl. AB019527:Homo sapiens mRNA for LDOC1 protein, complete cds /cds=(104,544) /gb=AB019527 /gi=3869126 /ug=Hs.45231 /len=1370                    |
| 275_at     | 0.88 | 0.66 | 0.61 | L05147 /FEATURE= /DEFINITION=HUMDSPHS Human dual specificity phosphatase tyrosine/serine mRNA, complete cds                                                |
| 35343_at   | 0.48 | 0.66 | 0.52 | Cluster Incl. M37400:Human cytosolic aspartate aminotransferase mRNA, complete cds /cds=(24,1265) /gb=M37400 /gi=179066 /ug=Hs.597 /len=1941               |
| 476_s_at   | 1.01 | 0.66 | 0.68 | U50079 /FEATURE= /DEFINITION=HSU50079 Human histone deacetylase HD1 mRNA, complete cds                                                                     |
| 33891_at   | 0.74 | 0.66 | 0.80 | Cluster Incl. AL080061:Homo sapiens mRNA; cDNA DKFp564H182 (from clone DKFp564H182) /cds=UNKNOWN /gb=AL080061 /gi=5262465 /ug=Hs.25035 /le                 |
| 40966_at   | 0.55 | 0.66 | 0.55 | Cluster Incl. AF099989:Homo sapiens Ste-20 related kinase SPAK mRNA, complete cds /cds=(173,1816) /gb=AF099989 /gi=3851170 /ug=Hs.199263 /len=3293         |
| 2034_s_at  | 1.33 | 1.50 | 0.92 | U10906 /FEATURE= /DEFINITION=HSU10906 Human cyclin-dependent kinase inhibitor p27kip1 mRNA, complete cds                                                   |
| 33898_at   | 0.95 | 1.50 | 0.88 | Cluster Incl. AF015308:Homo sapiens nucleolar protein (MSP58) mRNA, complete cds /cds=(116,1504) /gb=AF015308 /gi=2384716 /ug=Hs.25313 /len=1844           |
| 38990_at   | 1.26 | 1.50 | 1.27 | Cluster Incl. AL031178:Human DNA sequence from clone 341E18 on chromosome 6p11.2-12.3. Contains a Serine/Threonine Protein Kinase gene (presumptive is     |
| 31844_at   | 1.34 | 1.50 | 1.47 | Cluster Incl. AF000573:Homo sapiens homogentisate 1,2-dioxygenase gene, complete cds /cds=(167,1504) /gb=AF000573 /gi=2130646 /ug=Hs.15113 /len=1715       |
| 38773_at   | 1.45 | 1.51 | 1.84 | Cluster Incl. AB003151:Homo sapiens DNA, chromosome 21q22.2, PAC clone 25P16 complete sequence, encoding carbonyl reductase and carbonyl reductase 3       |
| 37632_s_at | 0.62 | 1.51 | 1.07 | Cluster Incl. X98260:H.sapiens mRNA for M-phase phosphoprotein, mpp11 /cds=(0,1750) /gb=X98260 /gi=1770453 /ug=Hs.82254 /len=1845                          |
| 39008_at   | 4.46 | 1.51 | 2.23 | Cluster Incl. M13699:Human ceruloplasmin (ferroxidase) mRNA, complete cds /cds=(0,3197) /gb=M13699 /gi=180255 /ug=Hs.111461 /len=3321                      |
| 40879_at   | 1.11 | 1.51 | 1.32 | Cluster Incl. AB014599:Homo sapiens mRNA for KIAA0699 protein, partial cds /cds=(0,2544) /gb=AB014599 /gi=3327211 /ug=Hs.17411 /len=6329                   |
| 39089_at   | 1.00 | 1.51 | 0.75 | Cluster Incl. Y07604:H.sapiens mRNA for nucleoside-diphosphate kinase /cds=(11,574) /gb=Y07604 /gi=1945761 /ug=Hs.9235 /len=879                            |
| 942_at     | 1.39 | 1.52 | 1.15 | D31815 /FEATURE= /DEFINITION=HUMSMP30 Human mRNA for SMP-30 (senescence marker protein-30), complete cds                                                   |
| 40837_at   | 2.47 | 1.52 | 1.43 | Cluster Incl. M99436:Human transducin-like enhancer protein (TLE2) mRNA, complete cds /cds=(25,2256) /gb=M99436 /gi=307511 /ug=Hs.173063 /len=2271         |
| 39860_at   | 0.90 | 1.52 | 0.82 | Cluster Incl. U05040:Human FUSE binding protein mRNA, complete cds /cds=(26,1960) /gb=U05040 /gi=460151 /ug=Hs.118962 /len=2325                            |
| 941_at     | 1.13 | 1.52 | 1.03 | D29012 /FEATURE= /DEFINITION=HUMPSY Human mRNA for proteasome subunit Y, complete cds                                                                      |
| 449_at     | 1.02 | 1.52 | 1.13 | U66469 /FEATURE= /DEFINITION=HSU66469 Human cell growth regulator CGR19 mRNA, complete cds                                                                 |
| 37555_at   | 0.65 | 1.52 | 0.85 | Cluster Incl. X95263:H.sapiens mRNA for PWP2 protein /cds=(31,2790) /gb=X95263 /gi=1438061 /ug=Hs.79380 /len=3201                                          |

|            |      |      |      |                                                                                                                                                             |
|------------|------|------|------|-------------------------------------------------------------------------------------------------------------------------------------------------------------|
| 1206_at    | 1.01 | 1.53 | 0.88 | X66364 /FEATURE=cds /DEFINITION=HSSTHPKE H.sapiens mRNA PSSALRE for serine/threonine protein kinase                                                         |
| 38042_at   | 0.71 | 1.53 | 0.89 | Cluster Incl. X03674:Human mRNA for glucose-6-phosphate dehydrogenase (G6PD) /cds=(470,2017) /gb=X03674 /gi=31542 /ug=Hs.80206 /len=2625                    |
| 40133_s_at | 1.17 | 1.53 | 0.98 | Cluster Incl. W28944:54h12 Homo sapiens cDNA /gb=W28944 /gi=1308955 /ug=Hs.155742 /len=748                                                                  |
| 39091_at   | 1.05 | 1.53 | 1.21 | Cluster Incl. AF070523:Homo sapiens JWA protein mRNA, complete cds /cds=(115,681) /gb=AF070523 /gi=3764088 /ug=Hs.92384 /len=2114                           |
| 40576_f_at | 1.40 | 1.53 | 1.57 | Cluster Incl. D89678:Homo sapiens mRNA for A+U-rich element RNA binding factor, complete cds /cds=(57,872) /gb=D89678 /gi=3218539 /ug=Hs.170311 /len=24     |
| 34731_at   | 0.82 | 1.53 | 0.97 | Cluster Incl. D80007:Human mRNA for KIAA0185 gene, partial cds /cds=(0,5655) /gb=D80007 /gi=1136429 /ug=Hs.239499 /len=5823                                 |
| 35834_at   | 1.07 | 1.53 | 0.99 | Cluster Incl. X59766:H.sapiens mRNA for Zn-alpha2-glycoprotein /cds=(10,918) /gb=X59766 /gi=38025 /ug=Hs.71 /len=1184                                       |
| 41654_at   | 1.23 | 1.54 | 1.37 | Cluster Incl. X02994:Human mRNA for adenosine deaminase (adenosine aminohydrolase, EC 3.5.4.4) /cds=(95,1186) /gb=X02994 /gi=28379 /ug=Hs.1217 /len=14      |
| 35764_at   | 1.38 | 1.54 | 1.75 | Cluster Incl. Y15164:Homo sapiens mRNA for protein encoded by cxorf5 (71-7A) gene /cds=(311,3349) /gb=Y15164 /gi=3451165 /ug=Hs.6483 /len=3593              |
| 39387_at   | 0.68 | 1.54 | 0.90 | Cluster Incl. U34044:Human selenium donor protein (selD) mRNA, complete cds /cds=(267,1418) /gb=U34044 /gi=1000283 /ug=Hs.124027 /len=1672                  |
| 411_i_at   | 1.00 | 1.55 | 0.95 | X57351 /FEATURE=cds /DEFINITION=HS18D Human 1-8D gene from interferon-inducible gene family                                                                 |
| 41600_at   | 0.94 | 1.55 | 1.46 | Cluster Incl. U59435:Human cell cycle protein p38-2G4 homolog (hG4-1) mRNA, complete cds /cds=(97,1281) /gb=U59435 /gi=2697004 /ug=Hs.5181 /len=1697        |
| 864_at     | 1.09 | 1.55 | 1.67 | U07664 /FEATURE=expanded_cds /DEFINITION=HSHB9HB2 Human HB9 homeobox gene, exons 2 and 3 and complete cds                                                   |
| 35214_at   | 3.32 | 1.55 | 4.33 | Cluster Incl. AF061016:Homo sapiens UDP-glucose dehydrogenase (UGDH) mRNA, complete cds /cds=(78,1562) /gb=AF061016 /gi=3127126 /ug=Hs.28309 /len=          |
| 31842_at   | 0.86 | 1.55 | 0.92 | Cluster Incl. AF038195:Homo sapiens clone 23661 unknown protein mRNA, complete cds /cds=(75,1334) /gb=AF038195 /gi=2795915 /ug=Hs.150922 /len=1391          |
| 39425_at   | 2.46 | 1.55 | 3.24 | Cluster Incl. X91247:H.sapiens mRNA for thioredoxin reductase /cds=(439,1932) /gb=X91247 /gi=1237037 /ug=Hs.13046 /len=3826                                 |
| 32102_at   | 0.83 | 1.55 | 1.70 | Cluster Incl. AB018273:Homo sapiens mRNA for KIAA0730 protein, partial cds /cds=(0,3014) /gb=AB018273 /gi=3882180 /ug=Hs.159492 /len=4318                   |
| 39965_at   | 0.97 | 1.55 | 1.17 | Cluster Incl. AI570572:tm78c02.x1 Homo sapiens cDNA, 3 end /clone=IMAGE-2164226 /clone_end=3 /gb=AI570572 /gi=4533946 /ug=Hs.45002 /len=813                 |
| 39119_s_at | 1.23 | 1.56 | 1.24 | Cluster Incl. AA631972:fmfc39 Homo sapiens cDNA /clone=CR7-5 /gb=AA631972 /gi=2554583 /ug=Hs.943 /len=896                                                   |
| 38671_at   | 1.33 | 1.56 | 2.15 | Cluster Incl. AB014520:Homo sapiens mRNA for KIAA0620 protein, partial cds /cds=(0,5957) /gb=AB014520 /gi=3327053 /ug=Hs.105958 /len=6754                   |
| 38840_s_at | 1.69 | 1.56 | 1.81 | Cluster Incl. L10678:Human profilin II mRNA, complete cds /cds=(13,435) /gb=L10678 /gi=190387 /ug=Hs.91747 /len=1693                                        |
| 33250_at   | 0.73 | 1.57 | 0.76 | Cluster Incl. AL031228:dJ1033B10.2 (WD40 protein BING4 (similar to S. cerevisiae YER082C, M. sexta MNG10 and C. elegans F28D1.1) /cds=(65,1897) /gb=AL0     |
| 39709_at   | 1.02 | 1.57 | 0.90 | Cluster Incl. U67171:Human selenoprotein W (selW) mRNA, complete cds /cds=(61,324) /gb=U67171 /gi=2326174 /ug=Hs.14231 /len=739                             |
| 35724_at   | 4.11 | 1.57 | 4.01 | Cluster Incl. Y07867:H.sapiens mRNA for Pirin, isolate 1 /cds=(204,1076) /gb=Y07867 /gi=1907075 /ug=Hs.38842 /len=1277                                      |
| 37267_at   | 1.30 | 1.57 | 1.07 | Cluster Incl. Z50115:H.sapiens mRNA for thimet oligopeptidase (metalloproteinase) /cds=(127,2196) /gb=Z50115 /gi=1030054 /ug=Hs.78769 /len=2515             |
| 35800_at   | 0.66 | 1.57 | 0.65 | Cluster Incl. D63391:Human mRNA for platelet activating factor acetylhydrolase IB gamma-subunit, complete cds /cds=(113,808) /gb=D63391 /gi=1122218 /ug=Hs  |
| 41408_at   | 1.00 | 1.57 | 1.39 | Cluster Incl. AF042169:Homo sapiens putative ATP-dependent mitochondrial RNA helicase (SUV3) mRNA, nuclear gene encoding mitochondrial protein, complete    |
| 1121_g_at  | 1.35 | 1.57 | 1.47 | J05459 /FEATURE=mRNA /DEFINITION=HUMGSTM3A Human glutathione transferase M3 (GSTM3) mRNA, complete cds                                                      |
| 34728_g_at | 1.31 | 1.57 | 1.20 | Cluster Incl. AI800578:wg12b07.x1 Homo sapiens cDNA, 3 end /clone=IMAGE-2364853 /clone_end=3 /gb=AI800578 /gi=5366138 /ug=Hs.239474 /len=598                |
| 32028_at   | 1.55 | 1.57 | 1.31 | Cluster Incl. U85773:Human phosphomannomutase (PMM2) mRNA, complete cds /cds=(48,788) /gb=U85773 /gi=2218086 /ug=Hs.154695 /len=2285                        |
| 39037_at   | 2.11 | 1.58 | 2.01 | Cluster Incl. L13773:Human AF-4 mRNA, complete cds /cds=(420,4052) /gb=L13773 /gi=306446 /ug=Hs.114765 /len=9379                                            |
| 40695_at   | 1.10 | 1.58 | 1.55 | Cluster Incl. J05272:Human IMP dehydrogenase type 1 mRNA complete cds /cds=(600,2144) /gb=J05272 /gi=186393 /ug=Hs.850 /len=2858                            |
| 38484_at   | 0.67 | 1.58 | 0.84 | Cluster Incl. D21267:Homo sapiens mRNA, complete cds /cds=(205,825) /gb=D21267 /gi=2373387 /ug=Hs.84389 /len=2046                                           |
| 38030_at   | 1.36 | 1.58 | 1.58 | Cluster Incl. AB002330:Human mRNA for KIAA0332 gene, partial cds /cds=(0,3087) /gb=AB002330 /gi=2224604 /ug=Hs.7976 /len=6823                               |
| 39951_at   | 1.51 | 1.58 | 2.01 | Cluster Incl. L20826:Human I-plastin mRNA, complete cds /cds=(97,1986) /gb=L20826 /gi=405229 /ug=Hs.430 /len=3639                                           |
| 40855_at   | 1.44 | 1.58 | 1.66 | Cluster Incl. AB028976:Homo sapiens mRNA for KIAA1053 protein, partial cds /cds=(0,1528) /gb=AB028976 /gi=5689442 /ug=Hs.173571 /len=5896                   |
| 40549_at   | 1.08 | 1.60 | 1.09 | Cluster Incl. L04658:Homo sapiens gene sequence /cds=UNKNOWN /gb=L04658 /gi=183068 /ug=Hs.166071 /len=1089                                                  |
| 40409_at   | 1.39 | 1.60 | 1.84 | Cluster Incl. U46689:Human microsomal aldehyde dehydrogenase (ALD10) mRNA, complete cds /cds=(449,1906) /gb=U46689 /gi=1870243 /ug=Hs.159608 /len=3         |
| 35174_i_at | 1.13 | 1.61 | 1.87 | Cluster Incl. X70940:H.sapiens mRNA for elongation factor 1 alpha-2 /cds=(83,1474) /gb=X70940 /gi=38455 /ug=Hs.2642 /len=1755                               |
| 303_at     | 0.96 | 1.61 | 1.33 | Guanine Nucleotide Exchange Factor 1                                                                                                                        |
| 41784_at   | 1.04 | 1.61 | 1.10 | Cluster Incl. AL080186:Homo sapiens mRNA; cDNA DKFZp564B0769 (from clone DKFZp564B0769) /cds=(0,900) /gb=AL080186 /gi=5262664 /ug=Hs.18368 /len=            |
| 1826_at    | 2.04 | 1.61 | 1.33 | M12174 /FEATURE= /DEFINITION=HUMRHOA Human ras-related rho mRNA (clone 6), partial cds                                                                      |
| 37104_at   | 1.17 | 1.61 | 1.26 | Cluster Incl. L40904:H. sapiens peroxisome proliferator activated receptor gamma, complete cds /cds=(172,1608) /gb=L40904 /gi=722619 /ug=Hs.100724 /len=181 |



|            |       |      |      |                                                                                                                                                                 |
|------------|-------|------|------|-----------------------------------------------------------------------------------------------------------------------------------------------------------------|
| 34696_at   | 0.86  | 1.62 | 1.27 | Cluster Incl. U66669:Homo sapiens 3-hydroxyisobutyryl-coenzyme A hydrolase mRNA, complete cds /cds=(63,1208) /gb=U66669 /gi=3320119 /ug=Hs.236642 /len=2400     |
| 39072_at   | 10.35 | 1.62 | 7.06 | Cluster Incl. L07648:Human MXI1 mRNA, complete cds /cds=(208,894) /gb=L07648 /gi=506626 /ug=Hs.118630 /len=2400                                                 |
| 35808_at   | 1.44  | 1.63 | 1.34 | Cluster Incl. AL031681:dJ862K6.2.2 (splicing factor, arginine/serine-rich 6 (SRP55-2)(isoform 2)) /cds=(106,513) /gb=AL031681 /gi=4775633 /ug=Hs.6891 /len=3957 |
| 1997_s_at  | 0.79  | 1.63 | 0.69 | U19599 /FEATURE= /DEFINITION=HSU19599 Human (BAX delta) mRNA, complete cds                                                                                      |
| 41460_at   | 0.88  | 1.63 | 1.12 | Cluster Incl. AF080561:Homo sapiens SYT interacting protein SIP mRNA, complete cds /cds=(80,2089) /gb=AF080561 /gi=3746786 /ug=Hs.11170 /len=2766               |
| 39884_g_at | 0.73  | 1.63 | 1.34 | Cluster Incl. AF091078:Homo sapiens clone 559 unknown mRNA, complete sequence /cds=(151,528) /gb=AF091078 /gi=3859993 /ug=Hs.125819 /len=1014                   |
| 38891_at   | 1.43  | 1.63 | 1.33 | Cluster Incl. X91148:H.sapiens mRNA for microsomal triglyceride transfer protein /cds=(24,1577) /gb=X91148 /gi=1217638 /ug=Hs.195799 /len=3860                  |
| 40756_at   | 1.09  | 1.63 | 1.29 | Cluster Incl. AF081280:Homo sapiens nucleoplasmin-3 (NPM3) mRNA, complete cds /cds=(11,547) /gb=AF081280 /gi=3415120 /ug=Hs.90691 /len=865                      |
| 38642_at   | 0.82  | 1.64 | 0.95 | Cluster Incl. Y10183:H.sapiens mRNA for MEMD protein /cds=(0,1748) /gb=Y10183 /gi=3183974 /ug=Hs.10247 /len=4193                                                |
| 41448_at   | 1.02  | 1.64 | 1.32 | Cluster Incl. AC004080:Homo sapiens PAC clone DJ0170019 from 7p15-p21 /cds=(0,1247) /gb=AC004080 /gi=2822164 /ug=Hs.110637 /len=1248                            |
| 1890_at    | 1.58  | 1.64 | 1.95 | AB000584 /FEATURE= /DEFINITION=AB000584 Homo sapiens mRNA for TGF-beta superfamily protein, complete cds                                                        |
| 39729_at   | 1.18  | 1.64 | 0.94 | Cluster Incl. L19185:Human natural killer cell enhancing factor (NKEFB) mRNA, complete cds /cds=(124,720) /gb=L19185 /gi=440307 /ug=Hs.146354 /len=980          |
| 38889_at   | 0.81  | 1.64 | 0.74 | Cluster Incl. AF104304:Homo sapiens Smad anchor for receptor activation (SARA) mRNA, complete cds /cds=(438,4409) /gb=AF104304 /gi=4092766 /ug=Hs.1947          |
| 38036_at   | 0.77  | 1.64 | 1.32 | Cluster Incl. L35035:Homo sapiens ribose 5-phosphate isomerase (RPI) mRNA /cds=UNKNOWN /gb=L35035 /gi=836672 /ug=Hs.79886 /len=1128                             |
| 38365_at   | 0.77  | 1.64 | 2.29 | Cluster Incl. AF026086:Homo sapiens peroxisome biogenesis disorder protein 1 (PEX1) mRNA, complete cds /cds=(60,3911) /gb=AF026086 /gi=2655140 /ug=Hs.1947      |
| 1373_at    | 1.30  | 1.65 | 1.50 | M31523 /FEATURE= /DEFINITION=HUMTFAA Human transcription factor (E2A) mRNA, complete cds                                                                        |
| 40789_at   | 1.81  | 1.65 | 1.84 | Cluster Incl. U54645:Human adenylate kinase 2B (adk2b) gene, complete cds /cds=(3,701) /gb=U54645 /gi=1710886 /ug=Hs.171811 /len=2105                           |
| 33791_at   | 1.89  | 1.65 | 2.21 | Cluster Incl. Y15227:Homo sapiens mRNA for leukemia associated gene 1 /cds=(267,485) /gb=Y15227 /gi=2664278 /ug=Hs.20149 /len=981                               |
| 32706_at   | 0.70  | 1.65 | 1.25 | Cluster Incl. X89887:Homo sapiens mRNA for WD repeat protein (HIRA) /cds=(220,3273) /gb=X89887 /gi=3928218 /ug=Hs.172350 /len=4018                              |
| 40497_at   | 1.28  | 1.65 | 1.04 | Cluster Incl. AF040707:Homo sapiens candidate tumor suppressor gene 21 protein isoform I mRNA, complete cds /cds=(63,1205) /gb=AF040707 /gi=3688794 /ug=Hs.1947 |
| 41758_at   | 1.01  | 1.65 | 1.24 | Cluster Incl. AL096879:Novel human mRNA similar to C. elegans gene WP-CE18674, TR-Q19985 /cds=(4,1125) /gb=AL096879 /gi=5596704 /ug=Hs.182626 /len=2400         |
| 524_at     | 1.18  | 1.66 | 1.87 | U13695 /FEATURE=cds /DEFINITION=HSU13695 Human homolog of yeast mutL (hPMS1) gene, complete cds                                                                 |
| 1374_g_at  | 1.82  | 1.66 | 1.47 | M31523 /FEATURE= /DEFINITION=HUMTFAA Human transcription factor (E2A) mRNA, complete cds                                                                        |
| 38994_at   | 1.13  | 1.66 | 1.08 | Cluster Incl. AF037989:Homo sapiens STAT-induced STAT inhibitor-2 mRNA, complete cds /cds=(317,913) /gb=AF037989 /gi=3265032 /ug=Hs.110776 /len=1937            |
| 36106_at   | 1.29  | 1.67 | 1.01 | Cluster Incl. X01388:Human mRNA for pre-apolipoprotein CIII /cds=(71,370) /gb=X01388 /gi=28727 /ug=Hs.73849 /len=558                                            |
| 38295_at   | 1.00  | 1.67 | 0.77 | Cluster Incl. X59842:Human PBX2 mRNA /cds=UNKNOWN /gb=X59842 /gi=35312 /ug=Hs.93728 /len=3236                                                                   |
| 40813_at   | 0.85  | 1.67 | 1.14 | Cluster Incl. AI768188:wg82b12.x1 Homo sapiens cDNA, 3 end /clone=IMAGE-2371583 /clone_end=3 /gb=AI768188 /gi=5234697 /ug=Hs.172455 /len=558                    |
| 38634_at   | 0.67  | 1.67 | 0.72 | Cluster Incl. M11433:Human cellular retinol-binding protein mRNA, complete cds /cds=(125,532) /gb=M11433 /gi=190947 /ug=Hs.101850 /len=716                      |
| 41154_r_at | 1.05  | 1.67 | 1.41 | Cluster Incl. AF102803:untitled /cds=(2,2722) /gb=AF102803 /gi=4092760 /ug=Hs.178452 /len=3668                                                                  |
| 402_s_at   | 1.56  | 1.68 | 1.34 | X69819 /FEATURE=cds /DEFINITION=HSCAM3RN H.sapiens ICAM-3 mRNA                                                                                                  |
| 38540_at   | 0.98  | 1.68 | 0.99 | Cluster Incl. AF043938:Homo sapiens Ras-related protein M-Ras/R-Ras3 mRNA, complete cds /cds=(103,729) /gb=AF043938 /gi=4105177 /ug=Hs.173161 /len=1014         |
| 34358_at   | 1.06  | 1.68 | 0.80 | Cluster Incl. Z49254:H.sapiens L23-related mRNA /cds=(54,515) /gb=Z49254 /gi=1478199 /ug=Hs.3254 /len=700                                                       |
| 35415_at   | 1.13  | 1.68 | 1.06 | Cluster Incl. X12901:Human mRNA for villin /cds=(24,2507) /gb=X12901 /gi=37842 /ug=Hs.166068 /len=2690                                                          |
| 37240_at   | 1.01  | 1.69 | 0.94 | Cluster Incl. U18937:Human histidyl-tRNA synthetase homolog (HO3) mRNA, complete cds /cds=(149,1669) /gb=U18937 /gi=899108 /ug=Hs.77798 /len=2423               |
| 41809_at   | 0.99  | 1.69 | 1.39 | Cluster Incl. AI656421:tt50h10.x1 Homo sapiens cDNA, 3 end /clone=IMAGE-2244259 /clone_end=3 /gb=AI656421 /gi=4740400 /ug=Hs.5671 /len=566                      |
| 38763_at   | 0.88  | 1.69 | 1.30 | Cluster Incl. L29254:Human (clone P1-5) L-idoitol-2 dehydrogenase gene /cds=(137,1210) /gb=L29254 /gi=808013 /ug=Hs.878 /len=2519                               |
| 34407_at   | 1.27  | 1.69 | 1.01 | Cluster Incl. U77594:Human tazarotene-induced gene 2 (TIG2) mRNA, complete cds /cds=(96,587) /gb=U77594 /gi=1848263 /ug=Hs.37682 /len=708                       |
| 41073_at   | 2.21  | 1.69 | 2.20 | Cluster Incl. AI743745:wg53d06.x1 Homo sapiens cDNA, 3 end /clone=IMAGE-2368811 /clone_end=3 /gb=AI743745 /gi=5112033 /ug=Hs.98384 /len=553                     |
| 38501_s_at | 1.29  | 1.70 | 1.68 | Cluster Incl. U37139:Human beta 3-endonexin mRNA, long form and short form, complete cds /cds=(130,465) /gb=U37139 /gi=1065438 /ug=Hs.169420 /len=897           |
| 41850_s_at | 1.03  | 1.70 | 1.21 | Cluster Incl. U63825:Human hepatitis delta antigen interacting protein A (dipA) mRNA, complete cds /cds=(28,636) /gb=U63825 /gi=1488313 /ug=Hs.66713 /len=810   |
| 32798_at   | 1.32  | 1.70 | 1.53 | Cluster Incl. AF043105:Homo sapiens glutathione S-transferase mu 3 (GSTM3) gene, complete cds /cds=(16,693) /gb=AF043105 /gi=3169541 /ug=Hs.2006 /len=1014      |
| 1768_s_at  | 0.68  | 1.71 | 1.18 | X59932 /FEATURE=mRNA /DEFINITION=HSCSRCKIN Human mRNA for C-SRC-kinase                                                                                          |
| 33373_at   | 1.09  | 1.71 | 1.36 | Cluster Incl. AL049951:Homo sapiens mRNA; cDNA DKFp564O0122 (from clone DKFp564O0122) /cds=UNKNOWN /gb=AL049951 /gi=4884198 /ug=Hs.22370                        |

|            |       |      |       |                                                                                                                                                                |
|------------|-------|------|-------|----------------------------------------------------------------------------------------------------------------------------------------------------------------|
| 1104_s_at  | 0.93  | 1.71 | 0.92  | M11717 /FEATURE=mRNA /DEFINITION=HUMHSP70D Human heat shock protein (hsp 70) gene, complete cds                                                                |
| 37966_at   | 1.06  | 1.72 | 1.55  | Cluster Incl. AA187563:zp66g11.r1 Homo sapiens cDNA, 5 end /clone=IMAGE-625220 /clone_end=5 /gb=AA187563 /gi=1773781 /ug=Hs.8836 /len=531                      |
| 38376_at   | 2.02  | 1.73 | 1.28  | Cluster Incl. L46590:Homo sapiens very long chain acyl-CoA dehydrogenase gene, exons 1-20, complete cds /cds=(88,2055) /gb=L46590 /gi=1008851 /ug=Hs.822       |
| 41191_at   | 1.31  | 1.73 | 2.12  | Cluster Incl. AB023209:Homo sapiens mRNA for KIAA0992 protein, partial cds /cds=(0,2318) /gb=AB023209 /gi=4589627 /ug=Hs.180347 /len=4347                      |
| 38223_at   | 1.30  | 1.73 | 1.19  | Cluster Incl. AB024057:Homo sapiens mRNA for vascular Rab-GAP/TBC-containing protein, complete cds /cds=(1117,3810) /gb=AB024057 /gi=4514652 /ug=Hs.1          |
| 34428_at   | 1.87  | 1.73 | 1.74  | Cluster Incl. D50312:Human mRNA for uKATP-1, complete cds /cds=(270,1544) /gb=D50312 /gi=1109633 /ug=Hs.102308 /len=1747                                       |
| 36135_at   | 0.64  | 1.75 | 1.13  | Cluster Incl. U86602:Human nucleolar protein p40 mRNA, complete cds /cds=(142,1062) /gb=U86602 /gi=1835785 /ug=Hs.74407 /len=1325                              |
| 41122_at   | 1.03  | 1.76 | 1.37  | Cluster Incl. AB011173:Homo sapiens mRNA for KIAA0601 protein, partial cds /cds=(0,2660) /gb=AB011173 /gi=3043725 /ug=Hs.174174 /len=2985                      |
| 36070_at   | 2.02  | 1.77 | 2.34  | Cluster Incl. AL049389:Homo sapiens mRNA; cDNA DKFpZp586O0118 (from clone DKFpZp586O0118) /cds=UNKNOWN /gb=AL049389 /gi=4500182 /ug=Hs.50081                   |
| 38586_at   | 0.60  | 1.77 | 0.32  | Cluster Incl. M10050:Human liver fatty acid binding protein (FABP) mRNA, complete cds /cds=(42,425) /gb=M10050 /gi=182355 /ug=Hs.182167 /len=489               |
| 35809_g_at | 1.42  | 1.78 | 1.30  | Cluster Incl. AL031681:dJ862K6.2.2 (splicing factor, arginine/serine-rich 6 (SRP55-2)(isoform 2)) /cds=(106,513) /gb=AL031681 /gi=4775633 /ug=Hs.6891 /len=395 |
| 35710_s_at | 1.09  | 1.79 | 1.24  | Cluster Incl. U95006:Human D9 splice variant A mRNA, complete cds /cds=(3,194) /gb=U95006 /gi=2071992 /ug=Hs.37616 /len=697                                    |
| 39787_at   | 0.90  | 1.79 | 0.97  | Cluster Incl. AB029821:Homo sapiens mRNA for phosphatidylethanolamine N-methyltransferase, complete cds /cds=(180,779) /gb=AB029821 /gi=5459515 /ug=Hs         |
| 40078_at   | 1.33  | 1.80 | 2.92  | Cluster Incl. AF015287:Homo sapiens serine protease mRNA, complete cds /cds=(104,1255) /gb=AF015287 /gi=4102714 /ug=Hs.154737 /len=1631                        |
| 37628_at   | 0.90  | 1.80 | 1.08  | Cluster Incl. M69177:Human monoamine oxidase B (MAOB) mRNA, complete cds /cds=(77,1639) /gb=M69177 /gi=187358 /ug=Hs.82163 /len=2491                           |
| 41831_at   | 1.19  | 1.81 | 1.34  | Cluster Incl. AF077820:Homo sapiens LDL receptor member LR3 mRNA, complete cds /cds=(88,4935) /gb=AF077820 /gi=3831747 /ug=Hs.6347 /len=5135                   |
| 39085_at   | 0.78  | 1.82 | 0.81  | Cluster Incl. M37984:Human slow twitch skeletal muscle/cardiac muscle troponin C gene, complete cds /cds=(27,512) /gb=M37984 /gi=339945 /ug=Hs.118845 /len     |
| 34246_at   | 1.11  | 1.84 | 2.06  | Cluster Incl. AA418437:zv92d11.r1 Homo sapiens cDNA, 5 end /clone=IMAGE-767253 /clone_end=5 /gb=AA418437 /gi=2080284 /ug=Hs.22283 /len=591                     |
| 40325_at   | 1.24  | 1.84 | 1.30  | Cluster Incl. AB014460:Homo sapiens TSC2, NTHL1/NTH1 and SLC9A3R2/E3KARP genes, partial and complete cds /cds=(43,957) /gb=AB014460 /gi=3550832 /l             |
| 34777_at   | 33.13 | 1.85 | 11.00 | Cluster Incl. D14874:Homo sapiens mRNA for adrenomedullin precursor, complete cds /cds=(156,713) /gb=D14874 /gi=455470 /ug=Hs.394 /len=1449                    |
| 34445_at   | 0.99  | 1.85 | 1.36  | Cluster Incl. AB007940:Homo sapiens mRNA for KIAA0471 protein, complete cds /cds=(412,1524) /gb=AB007940 /gi=3413903 /ug=Hs.107325 /len=6834                   |
| 34898_at   | 0.57  | 1.85 | 1.93  | Cluster Incl. M30704:Human amphiregulin (AR) mRNA, complete cds, clones lambda-AR1 and lambda-AR2 /cds=(209,967) /gb=M30704 /gi=179039 /ug=Hs.1257             |
| 39249_at   | 1.20  | 1.85 | 2.26  | Cluster Incl. AB001325:Human AQP3 gene for aquaporin 3 (water channel), partial cds /cds=(60,938) /gb=AB001325 /gi=1854373 /ug=Hs.234642 /len=1442             |
| 38789_at   | 1.80  | 1.86 | 2.34  | Cluster Incl. L12711:Homo sapiens transketolase (tk) mRNA, complete cds /cds=(98,1969) /gb=L12711 /gi=388890 /ug=Hs.89643 /len=2069                            |
| 33123_at   | 1.38  | 1.86 | 1.23  | Cluster Incl. L10379:Human (clone CTG-B45d) mRNA sequence /cds=UNKNOWN /gb=L10379 /gi=307381 /ug=Hs.82508 /len=1725                                            |
| 37597_s_at | 0.92  | 1.87 | 1.60  | Cluster Incl. AF055006:Homo sapiens clone 24666 sec6 homolog mRNA, partial cds /cds=(0,1417) /gb=AF055006 /gi=3005726 /ug=Hs.8088 /len=1805                    |
| 1693_s_at  | 1.00  | 1.88 | 1.12  | D11139 /FEATURE=exons#1-4 /DEFINITION=HUMTIMP Human gene for tissue inhibitor of metalloproteinases, partial sequence                                          |
| 168_at     | 0.97  | 1.88 | 1.64  | U50196 /FEATURE= /DEFINITION=HSU50196 Human adenosine kinase mRNA, complete cds                                                                                |
| 35669_at   | 1.53  | 1.88 | 1.42  | Cluster Incl. AB014533:Homo sapiens mRNA for KIAA0633 protein, partial cds /cds=(0,3951) /gb=AB014533 /gi=3327079 /ug=Hs.33010 /len=5289                       |
| 34875_r_at | 1.38  | 1.88 | 1.89  | Cluster Incl. D86958:Human mRNA for KIAA0203 gene, complete cds /cds=(515,5290) /gb=D86958 /gi=1503989 /ug=Hs.50421 /len=6614                                  |
| 33251_at   | 8.73  | 1.88 | 9.04  | Cluster Incl. AB018322:Homo sapiens mRNA for KIAA0779 protein, partial cds /cds=(0,962) /gb=AB018322 /gi=3882278 /ug=Hs.179507 /len=3743                       |
| 38459_g_at | 0.91  | 1.89 | 1.29  | Cluster Incl. L39945:Human cytochrome b5 (CYB5) gene /cds=(120,548) /gb=L39945 /gi=703082 /ug=Hs.83834 /len=836                                                |
| 35303_at   | 0.50  | 1.89 | 1.10  | Cluster Incl. U96876:Homo sapiens insulin induced protein 1 (INSIG1) gene, complete cds /cds=(414,1247) /gb=U96876 /gi=2358268 /ug=Hs.56205 /len=2587          |
| 39070_at   | 1.86  | 1.90 | 2.00  | Cluster Incl. U03057:Human actin bundling protein (HSN) mRNA, complete cds /cds=(111,1592) /gb=U03057 /gi=458027 /ug=Hs.118400 /len=2767                       |
| 39084_at   | 1.01  | 1.90 | 1.01  | Cluster Incl. X56832:H.sapiens ENO3 gene for muscle specific enolase /cds=(108,1412) /gb=X56832 /gi=31166 /ug=Hs.118804 /len=1493                              |
| 38669_at   | 1.09  | 1.90 | 1.32  | Cluster Incl. D86959:Human mRNA for KIAA0204 gene, complete cds /cds=(511,3969) /gb=D86959 /gi=1503991 /ug=Hs.105751 /len=5988                                 |
| 38313_at   | 2.81  | 1.91 | 2.25  | Cluster Incl. AB028985:Homo sapiens mRNA for KIAA1062 protein, partial cds /cds=(0,4589) /gb=AB028985 /gi=5689460 /ug=Hs.94806 /len=5285                       |
| 34687_at   | 1.61  | 1.91 | 2.12  | Cluster Incl. AF052167:Homo sapiens clone 24749 and 24750 mRNA sequences /cds=UNKNOWN /gb=AF052167 /gi=3360478 /ug=Hs.235685 /len=1496                         |
| 36466_at   | 2.15  | 1.92 | 2.33  | Cluster Incl. U26742:Human dystrobrevin-delta mRNA, complete cds /cds=(324,1448) /gb=U26742 /gi=1255988 /ug=Hs.54435 /len=1707                                 |
| 384_at     | 0.88  | 1.98 | 0.90  | X71874 /FEATURE=cds#1 /DEFINITION=HSPROSCHY H.sapiens genes for proteasome-like subunit (MECL-1), chymotrypsin-like protease (CTRL-1) and protein              |
| 34813_at   | 1.23  | 1.98 | 1.71  | Cluster Incl. AL079283:Homo sapiens mRNA full length insert cDNA clone EUROIMAGE 39515 /cds=UNKNOWN /gb=AL079283 /gi=5102744 /ug=Hs.4310 /len=14               |
| 31888_s_at | 1.07  | 1.99 | 2.31  | Cluster Incl. AF001294:Homo sapiens IPL (IPL) mRNA, complete cds /cds=(56,514) /gb=AF001294 /gi=2150049 /ug=Hs.154036 /len=760                                 |
| 38513_at   | 0.82  | 2.04 | 1.43  | Cluster Incl. D31765:Human mRNA for KIAA0061 gene, partial cds /cds=(0,2713) /gb=D31765 /gi=498155 /ug=Hs.170114 /len=4276                                     |

|            |       |       |        |                                                                                                                                                          |
|------------|-------|-------|--------|----------------------------------------------------------------------------------------------------------------------------------------------------------|
| 31824_at   | 2.38  | 2.07  | 4.70   | Cluster Incl. AL049699:dJ747H23.1 (malic enzyme 1, soluble (NADP-dependent malic enzyme, malate oxidoreductase, EC 1.1.1.40)) /cds=(0,1014) /gb=AL049699 |
| 32944_at   | 1.54  | 2.09  | 1.73   | Cluster Incl. AF040990:Homo sapiens roundabout 1 (robo1) mRNA, complete cds /cds=(0,4955) /gb=AF040990 /gi=2804783 /ug=Hs.230104 /len=4956               |
| 907_at     | 1.20  | 2.15  | 1.66   | M13792 /FEATURE=cds /DEFINITION=HUMADAG Human adenosine deaminase (ADA) gene, complete cds                                                               |
| 1633_g_at  | 1.68  | 2.15  | 1.78   | U77735 /FEATURE= /DEFINITION=HSU77735 Human pim-2 protooncogene homolog pim-2h mRNA, complete cds                                                        |
| 36498_at   | 1.28  | 2.16  | 1.25   | Cluster Incl. AI936759:wp69b12.x1 Homo sapiens cDNA, 3 end /clone=IMAGE-2467007 /clone_end=3 /gb=AI936759 /gi=5675629 /ug=Hs.57600 /len=742              |
| 1232_s_at  | 10.01 | 2.18  | 3.55   | M74587 /FEATURE=mRNA /DEFINITION=HUMIGFBP1A Human insulin-like growth factor binding protein (IGFBP1) gene, complete cds                                 |
| 39805_at   | 9.24  | 2.19  | 4.69   | Cluster Incl. AF070598:Homo sapiens clone 24410 ABC transporter mRNA, partial cds /cds=(0,1537) /gb=AF070598 /gi=3387976 /ug=Hs.107911 /len=1704         |
| 41505_r_at | 0.83  | 2.19  | 0.93   | Cluster Incl. AF055376:Homo sapiens short form transcription factor C-MAF (c-maf) mRNA, complete cds /cds=(807,1928) /gb=AF055376 /gi=3335147 /ug=Hs.302 |
| 33121_g_at | 0.70  | 2.20  | 1.00   | Cluster Incl. AF045229:Homo sapiens regulator of G protein signaling 10 mRNA, complete cds /cds=(132,635) /gb=AF045229 /gi=2906029 /ug=Hs.82280 /len=753 |
| 40309_at   | 39.37 | 2.20  | 20.29  | Cluster Incl. X66839:H.sapiens MaTu MN mRNA for p54/58N protein /cds=(42,1421) /gb=X66839 /gi=1000701 /ug=Hs.63287 /len=1552                             |
| 38458_at   | 1.02  | 2.21  | 1.08   | Cluster Incl. L39945:Human cytochrome b5 (CYB5) gene /cds=(120,548) /gb=L39945 /gi=703082 /ug=Hs.83834 /len=836                                          |
| 37961_at   | 0.39  | 2.23  | 0.95   | Cluster Incl. U90907:Human clone 23907 mRNA sequence /cds=UNKNOWN /gb=U90907 /gi=1913886 /ug=Hs.88051 /len=1655                                          |
| 37567_at   | 0.82  | 2.23  | 0.89   | Cluster Incl. X98834:H.sapiens mRNA for zinc finger protein, Hsa12 /cds=UNKNOWN /gb=X98834 /gi=1806112 /ug=Hs.79971 /len=4836                            |
| 38968_at   | 1.78  | 2.23  | 2.67   | Cluster Incl. AB005047:Homo sapiens mRNA for SH3 binding protein, complete cds /cds=(63,1340) /gb=AB005047 /gi=3116213 /ug=Hs.109150 /len=2570           |
| AFFX-M2783 | 0.39  | 2.26  | 2.11   | M27830 Human 28S ribosomal RNA gene, complete cds ( _5, _M, _3 represent transcript regions 5 prime, Middle, and 3 prime respectively)                   |
| 31496_g_at | 1.52  | 2.28  | 1.06   | Cluster Incl. D63789:Homo sapiens DNA for SCM-1beta precursor, complete cds /cds=(21,365) /gb=D63789 /gi=1754608 /ug=Hs.174228 /len=485                  |
| 38607_at   | 1.57  | 2.29  | 1.92   | Cluster Incl. AF027204:Homo sapiens putative tetraspan transmembrane protein L6H (TM4SF5) mRNA, complete cds /cds=(32,625) /gb=AF027204 /gi=2587053 /    |
| 37890_at   | 0.98  | 2.29  | 1.32   | Cluster Incl. X69398:H.sapiens mRNA for OA3 antigenic surface determinant /cds=(106,1077) /gb=X69398 /gi=396175 /ug=Hs.82685 /len=1285                   |
| 40398_s_at | 0.89  | 2.35  | 0.92   | Cluster Incl. AI743406:wg92g12.x1 Homo sapiens cDNA, 3 end /clone=IMAGE-2372614 /clone_end=3 /gb=AI743406 /gi=5111694 /ug=Hs.77858 /len=498              |
| 41781_at   | 0.69  | 2.37  | 1.23   | Cluster Incl. U22815:Human LAR-interacting protein 1a mRNA, complete cds /cds=(229,3786) /gb=U22815 /gi=930340 /ug=Hs.183648 /len=3976                   |
| 34585_at   | 1.00  | 2.37  | 1.48   | Cluster Incl. L07919:Human homeodomain protein DLX-2 mRNA, 3 end /cds=(0,735) /gb=L07919 /gi=306709 /ug=Hs.419 /len=1840                                 |
| 873_at     | 1.52  | 2.37  | 1.66   | M26679 /FEATURE=expanded_cds /DEFINITION=HUMHOX13G Homo sapiens homeobox protein (HOX-1.3) gene, complete cds                                            |
| 39969_at   | 0.63  | 2.48  | 0.63   | Cluster Incl. AA255502:zr85b06.r1 Homo sapiens cDNA, 5 end /clone=IMAGE-682451 /clone_end=5 /gb=AA255502 /gi=1892406 /ug=Hs.46423 /len=348               |
| 37117_at   | 1.15  | 2.49  | 1.72   | Cluster Incl. Z83838:Human DNA sequence from PAC 127B20 on chromosome 22q11.2-qter, contains gene for GTPase-activating protein similar to rhoGAP protei |
| 36742_at   | 0.83  | 2.62  | 1.21   | Cluster Incl. U34249:Human putative zinc finger protein (ZNFB7) mRNA, complete cds /cds=(493,1890) /gb=U34249 /gi=4096653 /ug=Hs.59015 /len=2236         |
| 37312_at   | 2.01  | 2.92  | 2.81   | Cluster Incl. D50917:Human mRNA for KIAA0127 gene, complete cds /cds=(297,1241) /gb=D50917 /gi=1469176 /ug=Hs.77293 /len=5544                            |
| 41504_s_at | 0.88  | 3.12  | 1.18   | Cluster Incl. AF055376:Homo sapiens short form transcription factor C-MAF (c-maf) mRNA, complete cds /cds=(807,1928) /gb=AF055376 /gi=3335147 /ug=Hs.302 |
| 34678_at   | 1.02  | 4.10  | 6.25   | Cluster Incl. AL096713:Homo sapiens mRNA; cDNA DKFZp564E1616 (from clone DKFZp564E1616) /cds=UNKNOWN /gb=AL096713 /gi=5419845 /ug=Hs.234680              |
| 37608_g_at | 1.09  | 4.20  | 1.00   | Cluster Incl. AJ005168:Homo sapiens KHK gene, exons 4-8 /cds=(0,552) /gb=AJ005168 /gi=3169013 /ug=Hs.81454 /len=763                                      |
| 38606_at   | 1.12  | 4.64  | 0.98   | Cluster Incl. U32989:Human tryptophan oxygenase (TDO) mRNA, complete cds /cds=(64,1284) /gb=U32989 /gi=993045 /ug=Hs.183671 /len=1692                    |
| 36876_at   | 1.28  | 4.69  | 1.97   | Cluster Incl. M55150:Human fumarylacetoacetate hydrolase mRNA, complete cds /cds=(56,1315) /gb=M55150 /gi=182392 /ug=Hs.73875 /len=1447                  |
| 39411_at   | 1.95  | 5.31  | 5.20   | Cluster Incl. AL080156:Homo sapiens mRNA; cDNA DKFZp434J214 (from clone DKFZp434J214) /cds=(0,1081) /gb=AL080156 /gi=5262614 /ug=Hs.12813 /len=21        |
| 34951_at   | 2.41  | 5.35  | 1.96   | Cluster Incl. D10923:Human mRNA for HM74 /cds=(60,1223) /gb=D10923 /gi=219866 /ug=Hs.137555 /len=2041                                                    |
| 39248_at   | 1.53  | 6.19  | 5.46   | Cluster Incl. N74607:za55a01.s1 Homo sapiens cDNA, 3 end /clone=IMAGE-296424 /clone_end=3 /gb=N74607 /gi=1231892 /ug=Hs.234642 /len=487                  |
| 38125_at   | 10.63 | 6.19  | 13.67  | Cluster Incl. M14083:Human beta-migrating plasminogen activator inhibitor I mRNA, 3 end /cds=(0,1151) /gb=M14083 /gi=189566 /ug=Hs.82085 /len=2937       |
| 38038_at   | 0.43  | 7.23  | 2.80   | Cluster Incl. U21128:Human lumican mRNA, complete cds /cds=(84,1100) /gb=U21128 /gi=699576 /ug=Hs.79914 /len=1717                                        |
| 32945_i_at | 1.01  | 8.79  | 3.42   | Cluster Incl. X15422:Human mRNA for mannose-binding protein C /cds=(65,811) /gb=X15422 /gi=34486 /ug=Hs.2314 /len=3568                                   |
| 859_at     | 1.02  | 11.06 | 1.47   | U03688 /FEATURE= /DEFINITION=HSU03688 Human dioxin-inducible cytochrome P450 (CYP1B1) mRNA, complete cds                                                 |
| 33260_at   | 1.74  | 11.39 | 6.85   | Cluster Incl. L13857:Human guanine nucleotide exchange factor mRNA, complete cds /cds=(0,4001) /gb=L13857 /gi=306777 /ug=Hs.180029 /len=4002             |
| 40071_at   | 1.02  | 12.43 | 1.64   | Cluster Incl. U03688:Human dioxin-inducible cytochrome P450 (CYP1B1) mRNA, complete cds /cds=(346,1977) /gb=U03688 /gi=501030 /ug=Hs.154654 /len=510.    |
| 32392_s_at | 80.74 | 77.73 | 295.36 | Cluster Incl. M57951:Human bilirubin UDP-glucuronosyltransferase isozyme 2 mRNA, complete cds /cds=(29,1633) /gb=M57951 /gi=184474 /ug=Hs.233441 /len=2  |
| 1024_at    | 0.57  | 85.48 | 49.13  | X02612 /FEATURE=expanded_cds /DEFINITION=HSCYP450 Human gene for cytochrome P(1)-450                                                                     |
| 1025_g_at  | 0.17  | 99.58 | 64.78  | X02612 /FEATURE=expanded_cds /DEFINITION=HSCYP450 Human gene for cytochrome P(1)-450                                                                     |



|          |      |        |       |                                                                                                                                               |
|----------|------|--------|-------|-----------------------------------------------------------------------------------------------------------------------------------------------|
| 36767_at | 0.40 | 125.16 | 77.95 | Cluster Incl. K03191:Human cytochrome P-1-450 (TCDD-inducible) mRNA, complete cds /cds=(86,1624) /gb=K03191 /gi=181275 /ug=Hs.72912 /len=2565 |
|----------|------|--------|-------|-----------------------------------------------------------------------------------------------------------------------------------------------|

**Table 7. GO Data for Genes in Table 2**

| GENE_ID | ABBREVIATION | UNIGENE # | GO_NUMBER  | DESCRIPTION                                            |
|---------|--------------|-----------|------------|--------------------------------------------------------|
| 180453  | ACADVL       | 437178    | GO:0003995 | acyl-CoA dehydrogenase activity                        |
| 180453  | ACADVL       | 437178    | GO:0004466 | long-chain-acyl-CoA dehydrogenase activity             |
| 180453  | ACADVL       | 437178    | GO:0005739 | mitochondrion                                          |
| 180453  | ACADVL       | 437178    | GO:0006118 | electron transport                                     |
| 180453  | ACADVL       | 437178    | GO:0006629 | lipid metabolism                                       |
| 180453  | ACADVL       | 437178    | GO:0006631 | fatty acid metabolism                                  |
| 180453  | ACADVL       | 437178    | GO:0006635 | fatty acid beta-oxidation                              |
| 180453  | ACADVL       | 437178    | GO:0015980 | energy derivation by oxidation of organic compounds    |
| 180453  | ACADVL       | 437178    | GO:0016491 | oxidoreductase                                         |
| 163907  | ADM          | 441047    | GO:0005179 | hormone                                                |
| 163907  | ADM          | 441047    | GO:0005615 | extracellular space                                    |
| 163907  | ADM          | 441047    | GO:0005625 | soluble fraction                                       |
| 163907  | ADM          | 441047    | GO:0006171 | cAMP biosynthesis                                      |
| 163907  | ADM          | 441047    | GO:0006701 | progesterone biosynthesis                              |
| 163907  | ADM          | 441047    | GO:0007165 | signal transduction                                    |
| 163907  | ADM          | 441047    | GO:0007267 | cell-cell signaling                                    |
| 163907  | ADM          | 441047    | GO:0007565 | pregnancy                                              |
| 163907  | ADM          | 441047    | GO:0007588 | excretion                                              |
| 163907  | ADM          | 441047    | GO:0008015 | circulation                                            |
| 163907  | ADM          | 441047    | GO:0009611 | response to wounding                                   |
| 69693   | ANXA3        | 480042    | GO:0005509 | calcium ion binding                                    |
| 69693   | ANXA3        | 480042    | GO:0005544 | calcium-dependent phospholipid binding                 |
| 69693   | ANXA3        | 480042    | GO:0005737 | cytoplasm                                              |
| 69693   | ANXA3        | 480042    | GO:0007165 | signal transduction                                    |
| 69693   | ANXA3        | 480042    | GO:0008486 | diphosphoinositol-polyphosphate diphosphatase activity |
| 69693   | ANXA3        | 480042    | GO:0019834 | phospholipase A2 inhibitor activity                    |
| 124781  | CA9          | 63287     | GO:0004089 | carbonate dehydratase                                  |
| 124781  | CA9          | 63287     | GO:0005634 | nucleus                                                |
| 124781  | CA9          | 63287     | GO:0006730 | one-carbon compound metabolism                         |
| 124781  | CA9          | 63287     | GO:0008270 | zinc binding                                           |
| 124781  | CA9          | 63287     | GO:0016020 | membrane                                               |
| 124781  | CA9          | 63287     | GO:0016021 | integral membrane protein                              |
| 124781  | CA9          | 63287     | GO:0016829 | lyase                                                  |
| 124781  | CA9          | 63287     | GO:0046872 | metal ion binding                                      |
| 92427   | Car9         | 283682    | GO:0004089 | carbonate dehydratase                                  |
| 92427   | Car9         | 283682    | GO:0006730 | one-carbon compound metabolism                         |
| 92427   | Car9         | 283682    | GO:0008270 | zinc binding                                           |
| 92427   | Car9         | 283682    | GO:0016020 | membrane                                               |
| 92427   | Car9         | 283682    | GO:0016021 | integral membrane protein                              |
| 92427   | Car9         | 283682    | GO:0016829 | lyase                                                  |
| 92427   | Car9         | 283682    | GO:0046872 | metal ion binding                                      |
| 132425  | CCL20        | 75498     | GO:0005615 | extracellular space                                    |
| 132425  | CCL20        | 75498     | GO:0006935 | chemotaxis                                             |
| 132425  | CCL20        | 75498     | GO:0006954 | inflammatory response                                  |
| 132425  | CCL20        | 75498     | GO:0007165 | signal transduction                                    |
| 132425  | CCL20        | 75498     | GO:0007267 | cell-cell signaling                                    |
| 132425  | CCL20        | 75498     | GO:0008009 | chemokine activity                                     |
| 132425  | CCL20        | 75498     | GO:0019735 | antimicrobial humoral response (sensu Vertebrata)      |
| 132425  | CCL20        | 75498     | GO:0042742 | defense response to bacteria                           |
| 132425  | CCL20        | 75498     | GO:0050896 | response to stimulus                                   |
| 112684  | CDKN1C       | 106070    | GO:0000079 | regulation of CDK activity                             |
| 112684  | CDKN1C       | 106070    | GO:0000080 | G1 phase of mitotic cell cycle                         |
| 112684  | CDKN1C       | 106070    | GO:0004861 | cyclin-dependent protein kinase inhibitor              |
| 112684  | CDKN1C       | 106070    | GO:0005515 | protein binding                                        |
| 112684  | CDKN1C       | 106070    | GO:0005634 | nucleus                                                |
| 112684  | CDKN1C       | 106070    | GO:0007049 | cell cycle                                             |
| 112684  | CDKN1C       | 106070    | GO:0007050 | cell cycle arrest                                      |
| 112684  | CDKN1C       | 106070    | GO:0008285 | negative regulation of cell proliferation              |
| 89141   | CGA          | 119689    | GO:0005179 | hormone                                                |
| 89141   | CGA          | 119689    | GO:0005576 | extracellular                                          |
| 89141   | CGA          | 119689    | GO:0005625 | soluble fraction                                       |
| 89141   | CGA          | 119689    | GO:0007165 | signal transduction                                    |
| 89141   | CGA          | 119689    | GO:0007267 | cell-cell signaling                                    |

|        |          |        |            |                                                          |
|--------|----------|--------|------------|----------------------------------------------------------|
| 103215 | CP       | 558314 | GO:0004322 | ferroxidase activity                                     |
| 103215 | CP       | 558314 | GO:0005375 | copper ion transporter activity                          |
| 103215 | CP       | 558314 | GO:0005507 | copper binding                                           |
| 103215 | CP       | 558314 | GO:0005615 | extracellular space                                      |
| 103215 | CP       | 558314 | GO:0006811 | ion transport                                            |
| 103215 | CP       | 558314 | GO:0006825 | copper ion transport                                     |
| 103215 | CP       | 558314 | GO:0006878 | copper ion homeostasis                                   |
| 103215 | CP       | 558314 | GO:0006879 | iron homeostasis                                         |
| 103215 | CP       | 558314 | GO:0016491 | oxidoreductase                                           |
| 103215 | CP       | 558314 | GO:0046872 | metal ion binding                                        |
| 185279 | CYP1A1   | 72912  | GO:0005506 | iron binding                                             |
| 185279 | CYP1A1   | 72912  | GO:0005783 | endoplasmic reticulum                                    |
| 185279 | CYP1A1   | 72912  | GO:0005792 | microsome                                                |
| 185279 | CYP1A1   | 72912  | GO:0006118 | electron transport                                       |
| 185279 | CYP1A1   | 72912  | GO:0016020 | membrane                                                 |
| 185279 | CYP1A1   | 72912  | GO:0016712 | oxidoreductase                                           |
| 185279 | CYP1A1   | 72912  | GO:0019825 | oxygen binding                                           |
| 185279 | CYP1A1   | 72912  | GO:0020037 | heme binding                                             |
| 185279 | CYP1A1   | 72912  | GO:0046872 | metal ion binding                                        |
| 185279 | CYP1A1   | 72912  | GO:0050381 | unspecific monooxygenase activity                        |
| 73428  | EBNA1BP2 | 346868 | GO:0005624 | membrane fraction                                        |
| 73428  | EBNA1BP2 | 346868 | GO:0005634 | nucleus                                                  |
| 73428  | EBNA1BP2 | 346868 | GO:0007046 | ribosome biogenesis                                      |
| 89776  | FABP1    | 380135 | GO:0005319 | lipid transporter                                        |
| 89776  | FABP1    | 380135 | GO:0005737 | cytoplasm                                                |
| 89776  | FABP1    | 380135 | GO:0006631 | fatty acid metabolism                                    |
| 89776  | FABP1    | 380135 | GO:0006810 | transport                                                |
| 89776  | FABP1    | 380135 | GO:0007267 | cell-cell signaling                                      |
| 89776  | FABP1    | 380135 | GO:0008289 | lipid binding                                            |
| 89776  | FABP1    | 380135 | GO:0009887 | organogenesis                                            |
| 178660 | FGA      | 351593 | GO:0005515 | protein binding                                          |
| 178660 | FGA      | 351593 | GO:0005576 | extracellular                                            |
| 178660 | FGA      | 351593 | GO:0005577 | fibrinogen complex                                       |
| 178660 | FGA      | 351593 | GO:0005625 | soluble fraction                                         |
| 178660 | FGA      | 351593 | GO:0007596 | blood coagulation                                        |
| 178660 | FGA      | 351593 | GO:0008217 | blood pressure regulation                                |
| 178660 | FGA      | 351593 | GO:0008284 | positive regulation of cell proliferation                |
| 66061  | FGB      | 300774 | GO:0005576 | extracellular                                            |
| 66061  | FGB      | 300774 | GO:0005577 | fibrinogen complex                                       |
| 66061  | FGB      | 300774 | GO:0005625 | soluble fraction                                         |
| 66061  | FGB      | 300774 | GO:0007596 | blood coagulation                                        |
| 66061  | FGB      | 300774 | GO:0008217 | blood pressure regulation                                |
| 66061  | FGB      | 300774 | GO:0008284 | positive regulation of cell proliferation                |
| 87549  | FGB      | 593400 | GO:0005576 | extracellular                                            |
| 87549  | FGB      | 593400 | GO:0005577 | fibrinogen complex                                       |
| 87549  | FGB      | 593400 | GO:0005625 | soluble fraction                                         |
| 87549  | FGB      | 593400 | GO:0007596 | blood coagulation                                        |
| 87549  | FGB      | 593400 | GO:0008217 | blood pressure regulation                                |
| 87549  | FGB      | 593400 | GO:0008284 | positive regulation of cell proliferation                |
| 85358  | FSCN1    | 118400 | GO:0008283 | cell proliferation                                       |
| 85358  | FSCN1    | 118400 | GO:0015629 | actin cytoskeleton                                       |
| 85358  | FSCN1    | 118400 | GO:0030036 | actin cytoskeleton organization and biogenesis           |
| 85358  | FSCN1    | 118400 | GO:0030674 | protein binding, bridging                                |
| 85358  | FSCN1    | 118400 | GO:0051015 | actin filament binding                                   |
| 85358  | FSCN1    | 118400 | GO:0051017 | actin filament bundle formation                          |
| 88035  | HMOX1    | 517581 | GO:0004392 | heme oxygenase (decyclizing) activity                    |
| 88035  | HMOX1    | 517581 | GO:0004871 | signal transducer                                        |
| 88035  | HMOX1    | 517581 | GO:0005506 | iron binding                                             |
| 88035  | HMOX1    | 517581 | GO:0005624 | membrane fraction                                        |
| 88035  | HMOX1    | 517581 | GO:0005783 | endoplasmic reticulum                                    |
| 88035  | HMOX1    | 517581 | GO:0005792 | microsome                                                |
| 88035  | HMOX1    | 517581 | GO:0006788 | heme oxidation                                           |
| 88035  | HMOX1    | 517581 | GO:0016491 | oxidoreductase                                           |
| 88035  | HMOX1    | 517581 | GO:0043123 | positive regulation of I-kappaB kinase/NF-kappaB cascade |
| 88035  | HMOX1    | 517581 | GO:0046872 | metal ion binding                                        |

|        |         |        |            |                                                                      |
|--------|---------|--------|------------|----------------------------------------------------------------------|
| 169362 | HSD17B2 | 162795 | GO:0004303 | estradiol 17-beta-dehydrogenase activity                             |
| 169362 | HSD17B2 | 162795 | GO:0005789 | endoplasmic reticulum membrane                                       |
| 169362 | HSD17B2 | 162795 | GO:0006703 | estrogen biosynthesis                                                |
| 169362 | HSD17B2 | 162795 | GO:0008152 | metabolism                                                           |
| 169362 | HSD17B2 | 162795 | GO:0016020 | membrane                                                             |
| 169362 | HSD17B2 | 162795 | GO:0016021 | integral membrane protein                                            |
| 169362 | HSD17B2 | 162795 | GO:0016491 | oxidoreductase                                                       |
| 133499 | IGFBP1  | 401316 | GO:0001558 | regulation of cell growth                                            |
| 133499 | IGFBP1  | 401316 | GO:0005520 | insulin-like growth factor binding                                   |
| 133499 | IGFBP1  | 401316 | GO:0005576 | extracellular                                                        |
| 133499 | IGFBP1  | 401316 | GO:0005615 | extracellular space                                                  |
| 133499 | IGFBP1  | 401316 | GO:0007165 | signal transduction                                                  |
| 129751 | IGFBP3  | 450230 | GO:0001558 | regulation of cell growth                                            |
| 129751 | IGFBP3  | 450230 | GO:0005520 | insulin-like growth factor binding                                   |
| 129751 | IGFBP3  | 450230 | GO:0005576 | extracellular                                                        |
| 129751 | IGFBP3  | 450230 | GO:0008160 | protein tyrosine phosphatase activator                               |
| 129751 | IGFBP3  | 450230 | GO:0009968 | negative regulation of signal transduction                           |
| 129751 | IGFBP3  | 450230 | GO:0043065 | positive regulation of apoptosis                                     |
| 129751 | IGFBP3  | 450230 | GO:0045663 | positive regulation of myoblast differentiation                      |
| 129751 | IGFBP3  | 450230 | GO:0046872 | metal ion binding                                                    |
| 136415 | INHBB   | 1735   | GO:0001541 | ovarian follicle development                                         |
| 136415 | INHBB   | 1735   | GO:0005125 | cytokine                                                             |
| 136415 | INHBB   | 1735   | GO:0005179 | hormone                                                              |
| 136415 | INHBB   | 1735   | GO:0005576 | extracellular                                                        |
| 136415 | INHBB   | 1735   | GO:0006952 | defense response                                                     |
| 136415 | INHBB   | 1735   | GO:0008083 | growth factor                                                        |
| 136415 | INHBB   | 1735   | GO:0009605 | response to external stimulus                                        |
| 136415 | INHBB   | 1735   | GO:0030154 | cell differentiation                                                 |
| 136415 | INHBB   | 1735   | GO:0040007 | growth                                                               |
| 136415 | INHBB   | 1735   | GO:0042803 | protein homodimerization activity                                    |
| 136415 | INHBB   | 1735   | GO:0046789 | host cell surface receptor binding                                   |
| 136415 | INHBB   | 1735   | GO:0046881 | positive regulation of follicle-stimulating hormone secretion        |
| 136415 | INHBB   | 1735   | GO:0046882 | negative regulation of follicle-stimulating hormone secretion        |
| 136415 | INHBB   | 1735   | GO:0048178 | negative regulation of hepatocyte growth factor biosynthesis         |
| 123131 | INSIG1  | 520819 | GO:0008152 | metabolism                                                           |
| 123131 | INSIG1  | 520819 | GO:0008283 | cell proliferation                                                   |
| 123131 | INSIG1  | 520819 | GO:0016020 | membrane                                                             |
| 123131 | INSIG1  | 520819 | GO:0016021 | integral membrane protein                                            |
| 70750  | KNG1    | 77741  | GO:0004869 | cysteine protease inhibitor                                          |
| 70750  | KNG1    | 77741  | GO:0005102 | receptor binding                                                     |
| 70750  | KNG1    | 77741  | GO:0005576 | extracellular                                                        |
| 70750  | KNG1    | 77741  | GO:0006939 | smooth muscle contraction                                            |
| 70750  | KNG1    | 77741  | GO:0006954 | inflammatory response                                                |
| 70750  | KNG1    | 77741  | GO:0007162 | negative regulation of cell adhesion                                 |
| 70750  | KNG1    | 77741  | GO:0007596 | blood coagulation                                                    |
| 70750  | KNG1    | 77741  | GO:0008201 | heparin binding                                                      |
| 70750  | KNG1    | 77741  | GO:0008270 | zinc binding                                                         |
| 70750  | KNG1    | 77741  | GO:0030146 | diuresis                                                             |
| 70750  | KNG1    | 77741  | GO:0030147 | natriuresis                                                          |
| 70750  | KNG1    | 77741  | GO:0030195 | negative regulation of blood coagulation                             |
| 70750  | KNG1    | 77741  | GO:0042311 | vasodilation                                                         |
| 70750  | KNG1    | 77741  | GO:0043065 | positive regulation of apoptosis                                     |
| 186185 | LOX     | 102267 | GO:0004720 | protein-lysine 6-oxidase activity                                    |
| 186185 | LOX     | 102267 | GO:0005507 | copper binding                                                       |
| 186185 | LOX     | 102267 | GO:0005578 | extracellular matrix                                                 |
| 186185 | LOX     | 102267 | GO:0006464 | protein modification                                                 |
| 186185 | LOX     | 102267 | GO:0007169 | transmembrane receptor protein tyrosine kinase signaling pathway     |
| 186185 | LOX     | 102267 | GO:0016491 | oxidoreductase                                                       |
| 186185 | LOX     | 102267 | GO:0046872 | metal ion binding                                                    |
| 153784 | ME1     | 21160  | GO:0004473 | malate dehydrogenase (oxaloacetate-decarboxylating) (NADP+) activity |
| 153784 | ME1     | 21160  | GO:0005829 | cytosol                                                              |
| 153784 | ME1     | 21160  | GO:0005975 | carbohydrate metabolism                                              |
| 153784 | ME1     | 21160  | GO:0006099 | tricarboxylic acid cycle                                             |
| 153784 | ME1     | 21160  | GO:0006108 | malate metabolism                                                    |
| 153784 | ME1     | 21160  | GO:0016491 | oxidoreductase                                                       |



|        |        |        |            |                                                          |
|--------|--------|--------|------------|----------------------------------------------------------|
| 153784 | ME1    | 21160  | GO:0046872 | metal ion binding                                        |
| 153784 | ME1    | 21160  | GO:0051287 | NAD binding                                              |
| 196563 | MXI1   | 501023 | GO:0003677 | DNA binding                                              |
| 196563 | MXI1   | 501023 | GO:0003714 | transcription corepressor activity                       |
| 196563 | MXI1   | 501023 | GO:0005634 | nucleus                                                  |
| 196563 | MXI1   | 501023 | GO:0006355 | regulation of transcription                              |
| 196563 | MXI1   | 501023 | GO:0008285 | negative regulation of cell proliferation                |
| 196563 | MXI1   | 501023 | GO:0030528 | transcription regulator                                  |
| 196563 | MXI1   | 501023 | GO:0042994 | cytoplasmic sequestering of transcription factor         |
| 196563 | MXI1   | 501023 | GO:0045449 | regulation of transcription                              |
| 67839  | NR1H4  | 282735 | GO:0003700 | transcription factor                                     |
| 67839  | NR1H4  | 282735 | GO:0003707 | steroid hormone receptor                                 |
| 67839  | NR1H4  | 282735 | GO:0003713 | transcription coactivator activity                       |
| 67839  | NR1H4  | 282735 | GO:0003714 | transcription corepressor activity                       |
| 67839  | NR1H4  | 282735 | GO:0005634 | nucleus                                                  |
| 67839  | NR1H4  | 282735 | GO:0006350 | transcription                                            |
| 67839  | NR1H4  | 282735 | GO:0006355 | regulation of transcription                              |
| 67839  | NR1H4  | 282735 | GO:0007165 | signal transduction                                      |
| 67839  | NR1H4  | 282735 | GO:0008203 | cholesterol metabolism                                   |
| 67839  | NR1H4  | 282735 | GO:0008206 | bile acid metabolism                                     |
| 67839  | NR1H4  | 282735 | GO:0008270 | zinc binding                                             |
| 67839  | NR1H4  | 282735 | GO:0043565 | sequence-specific DNA binding                            |
| 67839  | NR1H4  | 282735 | GO:0046872 | metal ion binding                                        |
| 78504  | PAH    | 524672 | GO:0004497 | monooxygenase                                            |
| 78504  | PAH    | 524672 | GO:0004505 | phenylalanine 4-monooxygenase activity                   |
| 78504  | PAH    | 524672 | GO:0005506 | iron binding                                             |
| 78504  | PAH    | 524672 | GO:0006559 | L-phenylalanine catabolism                               |
| 78504  | PAH    | 524672 | GO:0008152 | metabolism                                               |
| 78504  | PAH    | 524672 | GO:0008652 | amino acid biosynthesis                                  |
| 78504  | PAH    | 524672 | GO:0009072 | aromatic amino acid family metabolism                    |
| 78504  | PAH    | 524672 | GO:0016597 | amino acid binding                                       |
| 78504  | PAH    | 524672 | GO:0046872 | metal ion binding                                        |
| 112707 | PCK2   | 75812  | GO:0000166 | nucleotide binding                                       |
| 112707 | PCK2   | 75812  | GO:0000166 | nucleotide binding                                       |
| 112707 | PCK2   | 75812  | GO:0004611 | phosphoenolpyruvate carboxykinase                        |
| 112707 | PCK2   | 75812  | GO:0004613 | phosphoenolpyruvate carboxykinase (GTP)                  |
| 112707 | PCK2   | 75812  | GO:0005525 | GTP binding                                              |
| 112707 | PCK2   | 75812  | GO:0005739 | mitochondrion                                            |
| 112707 | PCK2   | 75812  | GO:0006094 | gluconeogenesis                                          |
| 112707 | PCK2   | 75812  | GO:0016829 | lyase                                                    |
| 112707 | PCK2   | 75812  | GO:0030145 | manganese binding                                        |
| 91330  | PON3   | 440967 | GO:0004064 | arylesterase activity                                    |
| 91330  | PON3   | 440967 | GO:0005576 | extracellular                                            |
| 91330  | PON3   | 440967 | GO:0009605 | response to external stimulus                            |
| 91330  | PON3   | 440967 | GO:0016787 | hydrolase                                                |
| 172657 | SOS1   | 278733 | GO:0003677 | DNA binding                                              |
| 172657 | SOS1   | 278733 | GO:0005088 | Ras guanyl-nucleotide exchange factor activity           |
| 172657 | SOS1   | 278733 | GO:0005089 | Rho guanyl-nucleotide exchange factor activity           |
| 172657 | SOS1   | 278733 | GO:0005100 | Rho GTPase activator activity                            |
| 172657 | SOS1   | 278733 | GO:0005515 | protein binding                                          |
| 172657 | SOS1   | 278733 | GO:0005622 | intracellular                                            |
| 172657 | SOS1   | 278733 | GO:0007265 | Ras protein signal transduction                          |
| 172657 | SOS1   | 278733 | GO:0035023 | regulation of Rho protein signal transduction            |
| 102390 | SOX9   | 592098 | GO:0001501 | skeletal development                                     |
| 102390 | SOX9   | 592098 | GO:0001502 | cartilage condensation                                   |
| 102390 | SOX9   | 592098 | GO:0003677 | DNA binding                                              |
| 102390 | SOX9   | 592098 | GO:0003704 | specific RNA polymerase II transcription factor activity |
| 102390 | SOX9   | 592098 | GO:0005634 | nucleus                                                  |
| 102390 | SOX9   | 592098 | GO:0006350 | transcription                                            |
| 102390 | SOX9   | 592098 | GO:0006357 | regulation of transcription from Pol II promoter         |
| 131252 | TKT    | 89643  | GO:0004802 | transketolase activity                                   |
| 131252 | TKT    | 89643  | GO:0005509 | calcium ion binding                                      |
| 131252 | TKT    | 89643  | GO:0016740 | transferase                                              |
| 100780 | TXNRD1 | 567352 | GO:0004791 | thioredoxin reductase (NADPH)                            |
| 100780 | TXNRD1 | 567352 | GO:0005737 | cytoplasm                                                |

|        |        |        |            |                                                                |
|--------|--------|--------|------------|----------------------------------------------------------------|
| 100780 | TXNRD1 | 567352 | GO:0006118 | electron transport                                             |
| 100780 | TXNRD1 | 567352 | GO:0007165 | signal transduction                                            |
| 100780 | TXNRD1 | 567352 | GO:0008430 | selenium binding                                               |
| 100780 | TXNRD1 | 567352 | GO:0015036 | disulfide oxidoreductase                                       |
| 100780 | TXNRD1 | 567352 | GO:0016654 | oxidoreductase, acting on NADH or NADPH, disulfide as acceptor |
| 100780 | TXNRD1 | 567352 | GO:0050660 | FAD binding                                                    |
| 191159 | UGT1A1 | 124112 | GO:0005783 | endoplasmic reticulum                                          |
| 191159 | UGT1A1 | 124112 | GO:0005792 | microsome                                                      |
| 191159 | UGT1A1 | 124112 | GO:0006789 | bilirubin conjugation                                          |
| 191159 | UGT1A1 | 124112 | GO:0007586 | digestion                                                      |
| 191159 | UGT1A1 | 124112 | GO:0008152 | metabolism                                                     |
| 191159 | UGT1A1 | 124112 | GO:0008210 | estrogen metabolism                                            |
| 191159 | UGT1A1 | 124112 | GO:0015020 | glucuronosyltransferase                                        |
| 191159 | UGT1A1 | 124112 | GO:0016020 | membrane                                                       |
| 191159 | UGT1A1 | 124112 | GO:0016021 | integral membrane protein                                      |

**Table 8. PWM analysis of DREs identified in Figure 4**

| RefSeq    | Gene Abbrev. | DRE Score | HRE Score | Sequence             |
|-----------|--------------|-----------|-----------|----------------------|
| NM_000018 | ACADVL       | 0.831     | 0.794     | caggagaGCGTGgctaggt  |
|           |              | 0.836     | 0.816     | gaggggaGCGTGggagggga |
| NM_000076 | CDKN1C       | 0.820     | 0.844     | tgtgctGCGTGgtgtgt    |
|           |              | 0.849     | 0.864     | tgtgtgtGCGTGcgtgtgt  |
|           |              | 0.854     | 0.863     | tgtgtgtGCGTGcgcgcac  |
| NM_000096 | CP           | 0.826     | 0.785     | ctctataGCGTGctgtgtc  |
|           |              | 0.831     | 0.800     | ggtgactGCGTGacaattc  |
| NM_000346 | SOX9         | 0.824     | 0.799     | gtgtccgGCGTGaagagcg  |
| NM_000499 | CYP1A1       | 0.818     | 0.789     | tgacagtGCGTGatctcag  |
|           |              | 0.836     | 0.797     | cgcagtgGCGTGatctcgg  |
|           |              | 0.865     | 0.781     | ccccctcGCGTGactcga   |
|           |              | 0.916     | 0.813     | tgtatttGCGTGcctagct  |
|           |              | 0.924     | 0.841     | ctagcttGCGTGcgcggc   |
|           |              | 0.928     | 0.810     | aggcgttGCGTGagaagga  |
|           |              | 0.954     | 0.803     | ccggctcGCGTGagaagcg  |
| NM_000596 | IGFBP1       | 0.892     | 0.813     | tcaggggaGCGTGccatgct |
|           |              | 0.895     | 0.831     | gctcctaGCGTGcggcgct  |
| NM_000598 | IGFBP3       | 0.842     | 0.847     | gctccggGCGTGcgcacga  |
|           |              | 0.854     | 0.806     | ccaagcaGCGTGccccggt  |
| NM_000893 | KNG 1        | 0.857     | 0.807     | tacaggtGCGTGccaccac  |
| NM_001124 | ADM          | 0.866     | 0.810     | cggtctaGCGTGtcgggcc  |
| NM_002133 | HMOX1        | 0.822     | 0.819     | ctggaatGCGTGggacact  |
|           |              | 0.861     | 0.809     | ggccctgGCGTGggaggaa  |
|           |              | 0.884     | 0.773     | tgagtttGCGTGtatagat  |
| NM_002193 | INHBB        | 0.853     | 0.783     | ccaagttGCGTGgaccgc   |
|           |              | 0.893     | 0.823     | aaggcgtGCGTGagaggaa  |
|           |              | 0.895     | 0.850     | aggaggtGCGTGccaggcc  |
| NM_002395 | ME1          | 0.834     | 0.864     | ggggcggGCGTGggtggcg  |
|           |              | 0.844     | 0.845     | gcaccgcGCGTGcggcccg  |
|           |              | 0.857     | 0.825     | cgagccgGCGTGtgaggag  |
| NM_003088 | FSCN1        | 0.876     | 0.864     | ggaggggGCGTGcggggccg |
| NM_003330 | TXNRD1       | 0.818     | 0.794     | cttcgtgGCGTGtcgggtt  |
| NM_004563 | PCK2         | 0.853     | 0.850     | ctggagtGCGTGcagtggc  |
| NM_004591 | CCL20        | 0.828     | 0.786     | ggcagtaGCGTGatctcgg  |
| NM_005139 | ANXA3        | 0.838     | 0.813     | cccagctGCGTGggtgggg  |
| NM_005542 | INSIG1       | 0.826     | 0.814     | ggcgggtGCGTGtgccac   |
|           |              | 0.829     | 0.781     | ccaccacGCGTGtcatct   |
|           |              | 0.851     | 0.829     | ccagaccGCGTGcggacgg  |
|           |              | 0.855     | 0.851     | cggggcccGCGTGccccgca |
|           |              | 0.891     | 0.781     | ggctgttGCGTGacatgtg  |
| NM_005633 | SOS1         | 0.847     | 0.813     | cgccgtgGCGTGaggctcc  |
|           |              | 0.847     | 0.815     | atacattGCGTGctctggg  |
|           |              | 0.848     | 0.837     | cttggtgGCGTGcgcctgt  |
| NM_005962 | MXI1         | 0.818     | 0.835     | gttgaggGCGTGccatgtg  |
|           |              | 0.818     | 0.798     | tgacagtGCGTGatctcgg  |
| NM_006824 | EBNA1BP2     | 0.878     | 0.874     | gggacgtGCGTGcggcgg   |
| NM_007120 | UGT1A1       | 0.848     | 0.790     | tgaggtgGCGTGaacatgg  |

**Table 9. PWM analysis of HREs identified in Figure 4**

| RefSeq    | Gene Abbrev. | DRE Score           | HRE Score | Sequence             |
|-----------|--------------|---------------------|-----------|----------------------|
| NM_000018 | ACADVL       | 0.816               | 0.836     | gaaggggaCGTGgagggga  |
|           |              | 0.827               | 0.806     | gaagctggCGTGcaagagc  |
|           |              | 0.862               |           | ttccaacACGTGaacacac  |
|           |              | 0.891               |           | ttctcacACGTGcacaatg  |
|           |              | 0.899               |           | ttgtttACGTGttggaag   |
|           |              | 0.905               |           | attgtgcACGTGgagatg   |
|           |              | 0.935               |           | cgccaggACGTGggcgtgc  |
|           |              | 0.823               | 0.810     | cgactctCGTGtgcagg    |
|           |              | 0.844               | 0.820     | ttgttcgCGTGtgtgtg    |
|           |              | 0.863               | 0.854     | ttgtgtCGTGcgcgcac    |
| 0.864     | 0.849        | ttgtgtCGTGcgttgt    |           |                      |
| 0.893     |              | cacagacACGTGccaccac |           |                      |
| 0.893     |              | ggcggtACGTGaacccgc  |           |                      |
| 0.901     |              | tgacaggACGTGaacatgc |           |                      |
| 0.908     |              | tcctgggACGTGgagttt  |           |                      |
| 0.912     |              | agctcggACGTGaccgct  |           |                      |
| 0.917     |              | ttgtggcACGTGtctgtg  |           |                      |
| NM_000096 | CP           | 0.815               | 0.784     | attacagCGTGgaccaat   |
|           |              | 0.820               | 0.749     | tagccagCGTGtggcgg    |
|           |              | 0.856               |           | taattttACGTGaaattat  |
|           |              | 0.874               |           | gcagagaACGTGtctaat   |
|           |              | 0.907               |           | agctctACGTGaccacac   |
|           |              | 0.908               |           | taagtaaACGTGtccatg   |
| NM_000277 | PAH          | 0.820               | 0.786     | attacagCGTGagtcacc   |
|           |              | 0.824               | 0.777     | gggcccCGTGtgtactc    |
|           |              | 0.882               |           | accatgcACGTGgagagcg  |
|           |              | 0.902               |           | agagggcACGTGaacgctg  |
|           |              | 0.907               |           | aaacagcACGTGggcctga  |
|           |              | 0.909               |           | gctctccACGTGcatggt   |
|           |              | 0.917               |           | agcgttcACGTGccctcta  |
|           |              | 0.929               |           | caqccccACGTGctgtttg  |
|           |              | 0.837               | 0.807     | ttgagcgcCGTGagggagt  |
|           |              | 0.917               |           | cccttggACGTGttgccc   |
| 0.923     |              | gtccgggACGTGcaagagg |           |                      |
| 0.941     |              | gtccgggACGTGcttcgg  |           |                      |
| NM_000499 | CYP1A1       | 0.813               | 0.916     | ttgattCGTGcctact     |
|           |              | 0.814               | 0.782     | cagtcagCGTGcggcgc    |
|           |              | 0.821               | 0.771     | ttgcttcCGTGtgcctc    |
|           |              | 0.821               | 0.779     | attacagCGTGagccacc   |
|           |              | 0.836               | 0.810     | agcgtggCGTGcaatgc    |
|           |              | 0.841               | 0.924     | ctagcttCGTGcgcgcgc   |
|           |              | 0.842               | 0.761     | gcgcggcCGTGggtttg    |
|           |              | 0.899               |           | gtctgggACGTGgagagcc  |
| 0.918     |              | ggcttgcACGTGtggccac |           |                      |
| 0.926     |              | atccccgACGTGctcccca |           |                      |
| NM_000508 | FGA          | 0.867               |           | tttctaaACGTGaaagaat  |
|           |              | 0.912               |           | actgcagACGTGgaagct   |
|           |              | 0.813               | 0.892     | tcaggggaCGTGccatgct  |
| NM_000596 | IGFBP1       | 0.815               | 0.784     | attacagCGTGgaccaat   |
|           |              | 0.831               | 0.895     | gtctctcCGTGcgcgcct   |
|           |              | 0.915               |           | gagacagACGTGgagatc   |
|           |              | 0.916               |           | gagcctgACGTGgagaaat  |
|           |              | 0.828               | 0.802     | ctcggggCGTGcaagctg   |
|           |              | 0.847               | 0.842     | gctccggCGTGcgcacga   |
| NM_000598 | IGFBP3       | 0.866               |           | gactctcACGTGttgctac  |
|           |              | 0.899               |           | ttgcaacACGTGgagatct  |
|           |              | 0.925               |           | agcttctACGTGtgcctg   |
|           |              | 0.907               |           | tcataaACGTGcctggt    |
|           |              | 0.821               | 0.776     | tagcacaCGTGcttcaag   |
|           |              | 0.865               |           | gaaatcACGTGgcagcac   |
| 0.884     |              | ttgtgcccACGTGatttca |           |                      |
| NM_000940 | PON3         | 0.816               | 0.786     | gtaggagCGTGtgcgggc   |
|           |              | 0.946               |           | aggccagACGTGgagcgac  |
|           |              | 0.828               | 0.779     | ttgttccCGTGtgcgcc    |
|           |              | 0.885               |           | gactcttACGTGgggactc  |
| NM_001064 | TKT          | 0.889               |           | ttccagcACGTGgatgagt  |
|           |              | 0.893               |           | agctctcACGTGtccgct   |
|           |              | 0.896               |           | acaacaaACGTGagagagt  |
|           |              | 0.904               |           | ctcatccACGTGctgggag  |
|           |              | 0.906               |           | gggaaacACGTGgagcctc  |
|           |              | 0.822               | 0.780     | ggggcgcCGTGgattct    |
|           |              | 0.825               | 0.798     | ggagcgcCGTGcctgagg   |
|           |              | 0.888               |           | atcgtaaACGTGgagactg  |
|           |              | 0.889               |           | ttgtccaACGTGaatctac  |
|           |              | 0.891               |           | ttagcatACGTGgaagcgt  |
| NM_001216 | CA9          | 0.893               |           | gtgcaaaACGTGctagcg   |
|           |              | 0.813               | 0.766     | attatagCGTGgaccacc   |
|           |              | 0.825               | 0.791     | ttgtatgCGTGtccctgt   |
|           |              | 0.827               | 0.763     | ttgcccggCGTGtggcgg   |
|           |              | 0.886               |           | gcctccaACGTGacctagt  |
|           |              | 0.953               |           | gggctgtACGTGcatttga  |
| NM_001443 | FABP1        | 0.831               | 0.812     | acgggcaCGTGcagttgt   |
|           |              | 0.870               |           | accgctcACGTGacactag  |
|           |              | 0.878               |           | ttgttgcACGTGaccggtc  |
|           |              | 0.889               |           | ttgcagcaACGTGgatggag |
|           |              | 0.903               |           | aactgggACGTGaccaccat |
|           |              | 0.819               | 0.822     | ctggaatCGTGggacact   |
| NM_002133 | HMOX1        | 0.821               | 0.779     | attacagCGTGgaccacc   |
|           |              | 0.917               |           | ctggcccACGTGaccgcc   |
|           |              | 0.925               |           | gcgggtcACGTGggccagg  |
|           |              | 0.824               | 0.811     | agggtctCGTGgagtgat   |
|           |              | 0.827               | 0.814     | caagtggCGTGcacttgg   |
|           |              | 0.834               | 0.773     | gtctcagCGTGccccatg   |
| NM_002153 | HSD17B2      | 0.842               | 0.802     | ttgttgcCGTGtgtgtgc   |
|           |              | 0.862               |           | aaataatACGTGgtaaaga  |
|           |              | 0.883               |           | ctccagcACGTGttttgag  |
|           |              | 0.887               |           | ccaactcACGTGgagcag   |
|           |              | 0.893               |           | ggtttctACGTGgtaactg  |
|           |              | 0.894               |           | actgtgcACGTGgtgaaca  |
|           |              | 0.902               |           | gttccaccACGTGcaccgic |
|           |              | 0.907               |           | tcataaacACGTGctggagt |
|           |              | 0.908               |           | ttgactcACGTGgagttgg  |

| RefSeq    | Gene Abbrev. | DRE Score            | HRE Score | Sequence            |
|-----------|--------------|----------------------|-----------|---------------------|
| NM_002193 | INHBB        | 0.818                | 0.812     | gggtgggCGTGaagaagg  |
|           |              | 0.820                | 0.787     | agggcgaCGTGgacctc   |
|           |              | 0.823                | 0.893     | aagcgctCGTGgagagaa  |
|           |              | 0.826                | 0.788     | aaaaaaCGTGcgtgaga   |
|           |              | 0.850                | 0.895     | agggagtCGTGaacagcc  |
|           |              | 0.894                |           | accatataCGTGgacctc  |
|           |              | 0.907                |           | gggcccACGTGgtgggaa  |
|           |              | 0.908                |           | ttccaccACGTGggccccc |
|           |              | 0.871                |           | ttcatcaACGTGaacatgc |
|           |              | 0.875                |           | ttcattACGTGaacacac  |
| 0.877     |              | ttccctcACGTGatttgag  |           |                     |
| 0.885     |              | catgttcACGTGtatgaa   |           |                     |
| 0.888     |              | tcaaatACGTGgagggag   |           |                     |
| 0.896     |              | cttgacaACGTGgacctc   |           |                     |
| 0.896     |              | ctgtgcaACGTGctgggg   |           |                     |
| 0.909     |              | ttgctcggACGTGgacctc  |           |                     |
| 0.915     |              | agttcctACGTGcacaat   |           |                     |
| 0.915     |              | tttgcacaACGTGccagaaa |           |                     |
| 0.916     |              | attggaACGTGcaagcgg   |           |                     |
| 0.919     |              | gagggagACGTGgctcaca  |           |                     |
| NM_002395 | ME1          | 0.815                | 0.773     | attacagCGTGgaccaca  |
|           |              | 0.825                | 0.857     | cgagccgCGTGtaaggag  |
|           |              | 0.845                | 0.844     | ggaccgcCGTGcggccc   |
|           |              | 0.864                | 0.834     | ggggcggCGTGgagggcg  |
|           |              | 0.819                | 0.742     | ttgacggCGTGtggcgc   |
|           |              | 0.820                | 0.786     | attacagCGTGgagtcac  |
|           |              | 0.821                | 0.813     | cagggggCGTGgcttgtt  |
|           |              | 0.821                | 0.747     | attacagCGTGgaccacc  |
|           |              | 0.821                | 0.779     | attacagCGTGgaccacc  |
|           |              | 0.827                | 0.763     | ttgacggCGTGtggggcg  |
| 0.837     | 0.757        | agcccgCGTGtggctc     |           |                     |
| 0.837     | 0.801        | ggcaggCGTGcgggttc    |           |                     |
| 0.837     | 0.804        | ggtaggCGTGgaggggtg   |           |                     |
| 0.864     | 0.876        | ggagggCGTGcggggcg    |           |                     |
| NM_003330 | TXNRD1       | 0.820                | 0.760     | gcgcaggCGTGgctctc   |
|           |              | 0.857                |           | gacctcACGTGatgaca   |
|           |              | 0.894                |           | ctggccaACGTGttgaac  |
|           |              | 0.902                |           | gagggatACGTGtaaatg  |
|           |              | 0.906                |           | attcatACGTGgagttgt  |
|           |              | 0.911                |           | ttcatcACGTGgagttct  |
| NM_004563 | PCK2         | 0.819                | 0.782     | ttacagCGTGgaccacc   |
|           |              | 0.837                | 0.757     | agcccgCGTGtggctc    |
|           |              | 0.860                | 0.853     | ctggagCGTGcaatgac   |
|           |              | 0.855                | 0.814     | actaccgCGTGcaccacc  |
|           |              | 0.870                |           | ttcagaaACGTGgacctc  |
|           |              | 0.898                |           | ttcgttcACGTGgattct  |
| 0.902     |              | ctgacatACGTGatcttc   |           |                     |
| 0.906     |              | aatttgcACGTGagccctc  |           |                     |
| 0.924     |              | ggggctcACGTGcaattt   |           |                     |
| NM_004591 | CCL20        | 0.815                | 0.762     | ttcctggCGTGtggacc   |
|           |              | 0.825                | 0.751     | gggatggCGTGtggacc   |
|           |              | 0.880                |           | catgacaACGTGttgatt  |
|           |              | 0.901                |           | tacagggACGTGccaccac |
|           |              | 0.913                |           | agtagagACGTGgtttac  |
|           |              | 0.937                |           | ttgttgcACGTGgctttag |
| NM_005123 | NR1H4        | 0.820                | 0.782     | atgaccgCGTGgagtgata |
|           |              | 0.899                |           | gtttgttACGTGgagtagt |
|           |              | 0.909                |           | tacatgcACGTGgcccacc |
|           |              | 0.938                |           | ttggcgcACGTGcaatgag |
|           |              | 0.813                | 0.838     | cccagcCGTGggtgggg   |
|           |              | 0.866                |           | ctactaaACGTGttgacc  |
| 0.906     |              | tttactACGTGtctcgg    |           |                     |
| 0.913     |              | ttgactACGTGatctatg   |           |                     |
| 0.891     |              | ttgggcaACGTGgagaac   |           |                     |
| NM_005141 | FGB          | 0.814                | 0.826     | ggcgggCGTGtggccc    |
|           |              | 0.815                | 0.745     | agcccaCGTGgagctga   |
|           |              | 0.817                | 0.778     | gggggcaCGTGgagcctg  |
|           |              | 0.818                | 0.807     | gctcagCGTGgactcag   |
|           |              | 0.829                | 0.851     | cccagccCGTGcgggagg  |
|           |              | 0.836                | 0.813     | ttagatcaCGTGgagggag |
| 0.851     | 0.855        | ggggcccCGTGcccccca   |           |                     |
| 0.878     |              | cttgggaACGTGtaaatg   |           |                     |
| 0.897     |              | gctcactACGTGgacctc   |           |                     |
| 0.899     |              | cttagaaACGTGgactcag  |           |                     |
| 0.905     |              | caggttcACGTGatgccc   |           |                     |
| 0.906     |              | ccatagACGTGcgcacc    |           |                     |
| 0.912     |              | ccgcatcACGTGgacctc   |           |                     |
| NM_005633 | SOS1         | 0.813                | 0.847     | cccctgcCGTGgagcttc  |
|           |              | 0.813                | 0.773     | agccgcaCGTGtatctgg  |
|           |              | 0.815                | 0.847     | attacattCGTGtctggg  |
|           |              | 0.815                | 0.784     | attacagCGTGgaccacc  |
|           |              | 0.823                | 0.798     | actacagCGTGgaccacc  |
|           |              | 0.837                | 0.848     | cttgggCGTGgacctgt   |
|           |              | 0.895                |           | ctcagaaACGTGgagagc  |
|           |              | 0.896                |           | ggtaggcACGTGgagcgt  |
|           |              | 0.898                |           | aatgttACGTGgattatt  |
|           |              | 0.922                |           | cgctcactACGTGcctacc |
| 0.939     |              | agccggaACGTGgagcagc  |           |                     |
| 0.949     |              | gggaaagACGTGtggagg   |           |                     |
| NM_005962 | MX1          | 0.815                | 0.784     | attacagCGTGgaccacc  |
|           |              | 0.835                | 0.818     | gttggagCGTGgacctc   |
|           |              | 0.857                |           | cccagaaACGTGgagaca  |
|           |              | 0.819                | 0.763     | agccagcCGTGgagttag  |
|           |              | 0.874                | 0.878     | gggagctCGTGgagcagc  |
|           |              | 0.875                |           | acttccaACGTGgactcga |
| 0.886     |              | cgatcccACGTGgccaaca  |           |                     |
| 0.901     |              | tacagcACGTGcaccacc   |           |                     |
| 0.909     |              | cggtggcACGTGgagccac  |           |                     |
| 0.916     |              | gttggccACGTGgagcga   |           |                     |
| 0.937     |              | ttgttgcACGTGgctttag  |           |                     |
| 0.939     |              | ttgctcACGTGcaccacc   |           |                     |
| 0.958     |              | gttgggaACGTGcgttggc  |           |                     |
| NM_007120 | UGT1A1       | 0.836                | 0.772     | agccacaCGTGgagttga  |
|           |              | 0.874                |           | attgttACGTGgacattt  |
|           |              | 0.896                |           | ttcgttACGTGtctggca  |
